# Supplementary material for: Predictive and Prognostic Assessment Models for Tumor Deposit in Colorectal Cancer Patients With No Distant Metastasis
Source: Front Oncol. 2022 Feb 16;12:809277. doi: 10.3389/fonc.2022.809277 (PMC8888919; doi:10.3389/fonc.2022.809277)
Supplement: Supplementary file 1 [file DataSheet_1.xlsx]

## Sheet: colorectal
Patient ID	Marital status at diagnosis	Race recode (White, Black, Other)	Age recode	Sex	Year of diagnosis	Site recode ICD-O-3/WHO 2008	Grade (thru 2017)	Diagnostic Confirmation	ICD-O-3 Hist/behav, malignant	Combined Summary Stage (2004+)	Derived AJCC T, 6th ed (2004-2015)	Derived AJCC N, 6th ed (2004-2015)	Derived AJCC M, 6th ed (2004-2015)	CS site-specific factor 1 (2004-2017 varying by schema)	CS site-specific factor 4 (2004-2017 varying by schema)	CS tumor size (2004-2015)	Regional nodes examined (1988+)	Regional nodes positive (1988+)	Sequence number	RX Summ--Surg Prim Site (1998+)	RX Summ--Surg/Rad Seq	Radiation recode	Chemotherapy recode (yes, no/unk)	RX Summ--Systemic/Sur Seq	SEER cause-specific death classification	SEER other cause of death classification	Survival months	Vital status recode (study cutoff used)
839161	Married (including common law)	Other (American Indian/AK Native, Asian/Pacific Islander)	76	Male	2015	Cecum	Poorly differentiated; Grade III	Positive histology	8140/3: Adenocarcinoma, NOS	Regional	T4	N2	M0	999	990	33	15	9	One primary only	40	No radiation and/or cancer-directed surgery	None/Unknown	No/Unknown	No systemic therapy and/or surgical procedures	Dead (attributable to this cancer dx)	Alive or dead due to cancer	8	Dead
880621	Married (including common law)	White	65	Female	2015	Rectum	Moderately differentiated; Grade II	Positive histology	8140/3: Adenocarcinoma, NOS	Localized	T2	N0	M0	20	1	35	13	0	One primary only	30	Radiation prior to surgery	Beam radiation	Yes	Systemic therapy both before and after surgery	Alive or dead of other cause	Alive or dead due to cancer	46	Alive
889278	Single (never married)	White	80	Female	2013	Rectosigmoid Junction	Moderately differentiated; Grade II	Positive histology	8140/3: Adenocarcinoma, NOS	Localized	T2	N0	M0	999	0	40	30	0	One primary only	30	No radiation and/or cancer-directed surgery	None/Unknown	No/Unknown	No systemic therapy and/or surgical procedures	Alive or dead of other cause	Alive or dead due to cancer	67	Alive
956455	Widowed	White	85	Female	2012	Rectosigmoid Junction	Moderately differentiated; Grade II	Positive histology	8210/3: Adenocarcinoma in adenomatous polyp	Localized	T1	N0	M0	998	998	7	0	98	One primary only	26	No radiation and/or cancer-directed surgery	None/Unknown	No/Unknown	No systemic therapy and/or surgical procedures	Alive or dead of other cause	Dead (attributable to causes other than this cancer dx)	28	Dead
978943	Widowed	White	78	Male	2012	Cecum	Moderately differentiated; Grade II	Positive histology	8140/3: Adenocarcinoma, NOS	Regional	T4	N0	M0	998	0	50	15	0	One primary only	40	No radiation and/or cancer-directed surgery	None/Unknown	No/Unknown	No systemic therapy and/or surgical procedures	Dead (attributable to this cancer dx)	Alive or dead due to cancer	36	Dead
1045728	Widowed	White	83	Female	2011	Descending Colon	Moderately differentiated; Grade II	Positive histology	8140/3: Adenocarcinoma, NOS	Regional	T3	N1	M0	20	0	40	28	2	One primary only	30	No radiation and/or cancer-directed surgery	None/Unknown	No/Unknown	No systemic therapy and/or surgical procedures	Dead (attributable to this cancer dx)	Alive or dead due to cancer	13	Dead
1149614	Married (including common law)	Other (American Indian/AK Native, Asian/Pacific Islander)	65	Male	2014	Ascending Colon	Moderately differentiated; Grade II	Positive histology	8263/3: Adenocarcinoma in tubulovillous adenoma	Regional	T4	N2	M0	10	990	50	42	5	One primary only	40	No radiation and/or cancer-directed surgery	None/Unknown	No/Unknown	No systemic therapy and/or surgical procedures	Dead (attributable to this cancer dx)	Alive or dead due to cancer	1	Dead
1152879	Widowed	Other (American Indian/AK Native, Asian/Pacific Islander)	80	Female	2010	Rectum	Moderately differentiated; Grade II	Positive histology	8140/3: Adenocarcinoma, NOS	Regional	T2	N1	M0	999	0	15	4	1	One primary only	30	Radiation after surgery	Beam radiation	Yes	Systemic therapy after surgery	Alive or dead of other cause	Alive or dead due to cancer	107	Alive
1152896	Widowed	Other (American Indian/AK Native, Asian/Pacific Islander)	84	Female	2010	Rectum	Moderately differentiated; Grade II	Positive histology	8140/3: Adenocarcinoma, NOS	Localized	T1	N0	M0	998	0	30	0	98	One primary only	0	No radiation and/or cancer-directed surgery	Beam radiation	No/Unknown	No systemic therapy and/or surgical procedures	Alive or dead of other cause	Dead (attributable to causes other than this cancer dx)	2	Dead
1152906	Married (including common law)	Other (American Indian/AK Native, Asian/Pacific Islander)	72	Female	2010	Descending Colon	Moderately differentiated; Grade II	Positive histology	8140/3: Adenocarcinoma, NOS	Distant	T4	N2	M0	999	990	40	5	5	One primary only	30	Radiation after surgery	Beam radiation	Yes	Systemic therapy after surgery	Dead (attributable to this cancer dx)	Alive or dead due to cancer	5	Dead
1152922	Married (including common law)	Other (American Indian/AK Native, Asian/Pacific Islander)	81	Male	2010	Sigmoid Colon	Moderately differentiated; Grade II	Positive histology	8210/3: Adenocarcinoma in adenomatous polyp	Localized	T2	N0	M0	998	0	45	8	0	One primary only	40	No radiation and/or cancer-directed surgery	None/Unknown	No/Unknown	No systemic therapy and/or surgical procedures	Alive or dead of other cause	Dead (attributable to causes other than this cancer dx)	55	Dead
1152926	Married (including common law)	Other (American Indian/AK Native, Asian/Pacific Islander)	75	Female	2010	Ascending Colon	Moderately differentiated; Grade II	Positive histology	8210/3: Adenocarcinoma in adenomatous polyp	Regional	T3	N0	M0	20	0	55	11	0	One primary only	40	No radiation and/or cancer-directed surgery	None/Unknown	No/Unknown	No systemic therapy and/or surgical procedures	Alive or dead of other cause	Alive or dead due to cancer	103	Alive
1152934	Married (including common law)	Other (American Indian/AK Native, Asian/Pacific Islander)	52	Female	2010	Rectum	Moderately differentiated; Grade II	Positive histology	8263/3: Adenocarcinoma in tubulovillous adenoma	Regional	T4	N1	M0	20	990	20	4	1	One primary only	30	Radiation before and after surgery	Beam radiation	Yes	Systemic therapy both before and after surgery	Alive or dead of other cause	Alive or dead due to cancer	106	Alive
1153165	Married (including common law)	White	64	Male	2010	Descending Colon	Moderately differentiated; Grade II	Positive histology	8140/3: Adenocarcinoma, NOS	Distant	T3	N1	M1	998	0	47	16	2	One primary only	40	No radiation and/or cancer-directed surgery	None/Unknown	Yes	Systemic therapy after surgery	Alive or dead of other cause	Alive or dead due to cancer	107	Alive
1153180	Single (never married)	Black	63	Female	2010	Hepatic Flexure	Moderately differentiated; Grade II	Positive histology	8140/3: Adenocarcinoma, NOS	Regional	T3	N0	M0	20	0	80	22	0	One primary only	40	No radiation and/or cancer-directed surgery	None/Unknown	No/Unknown	No systemic therapy and/or surgical procedures	Alive or dead of other cause	Alive or dead due to cancer	102	Alive
1153181	Widowed	White	85	Female	2010	Ascending Colon	Moderately differentiated; Grade II	Positive histology	8140/3: Adenocarcinoma, NOS	Distant	T3	N2	M1	20	0	45	29	6	One primary only	40	No radiation and/or cancer-directed surgery	None/Unknown	No/Unknown	No systemic therapy and/or surgical procedures	Dead (attributable to this cancer dx)	Alive or dead due to cancer	9	Dead
1153199	Divorced	Black	71	Female	2010	Cecum	Moderately differentiated; Grade II	Positive histology	8140/3: Adenocarcinoma, NOS	Localized	T2	N0	M0	998	0	50	13	0	One primary only	40	No radiation and/or cancer-directed surgery	None/Unknown	No/Unknown	No systemic therapy and/or surgical procedures	Alive or dead of other cause	Alive or dead due to cancer	101	Alive
1153268	Married (including common law)	White	61	Male	2010	Cecum	Moderately differentiated; Grade II	Positive histology	8140/3: Adenocarcinoma, NOS	Distant	T4	N1	M1	10	998	999	0	98	One primary only	0	No radiation and/or cancer-directed surgery	None/Unknown	Yes	No systemic therapy and/or surgical procedures	Dead (attributable to this cancer dx)	Alive or dead due to cancer	20	Dead
1153348	Married (including common law)	White	58	Male	2010	Sigmoid Colon	Moderately differentiated; Grade II	Positive histology	8263/3: Adenocarcinoma in tubulovillous adenoma	Localized	T2	N0	M0	998	0	45	18	0	One primary only	30	No radiation and/or cancer-directed surgery	None/Unknown	No/Unknown	No systemic therapy and/or surgical procedures	Alive or dead of other cause	Alive or dead due to cancer	107	Alive
1153389	Single (never married)	Other (American Indian/AK Native, Asian/Pacific Islander)	52	Female	2010	Descending Colon	Well differentiated; Grade I	Positive histology	8140/3: Adenocarcinoma, NOS	Regional	T1	N1	M0	998	999	6	15	1	One primary only	40	No radiation and/or cancer-directed surgery	None/Unknown	Yes	Systemic therapy after surgery	Alive or dead of other cause	Alive or dead due to cancer	105	Alive
1153392	Married (including common law)	White	58	Male	2010	Cecum	Poorly differentiated; Grade III	Positive histology	8140/3: Adenocarcinoma, NOS	Regional	T2	N1	M0	10	0	30	15	1	One primary only	30	No radiation and/or cancer-directed surgery	None/Unknown	Yes	Systemic therapy after surgery	Alive or dead of other cause	Alive or dead due to cancer	104	Alive
1153401	Married (including common law)	Black	59	Female	2010	Cecum	Moderately differentiated; Grade II	Positive histology	8480/3: Mucinous adenocarcinoma	Localized	T3	N0	M0	10	0	40	32	0	One primary only	40	No radiation and/or cancer-directed surgery	None/Unknown	No/Unknown	No systemic therapy and/or surgical procedures	Alive or dead of other cause	Alive or dead due to cancer	98	Alive
1153421	Married (including common law)	White	60	Male	2010	Cecum	Moderately differentiated; Grade II	Positive histology	8140/3: Adenocarcinoma, NOS	Localized	T3	N0	M0	999	0	55	28	0	One primary only	40	No radiation and/or cancer-directed surgery	None/Unknown	No/Unknown	No systemic therapy and/or surgical procedures	Alive or dead of other cause	Alive or dead due to cancer	106	Alive
1153432	Widowed	Other (American Indian/AK Native, Asian/Pacific Islander)	85	Female	2010	Ascending Colon	Moderately differentiated; Grade II	Positive histology	8140/3: Adenocarcinoma, NOS	Regional	T3	N0	M0	10	0	25	18	0	One primary only	40	No radiation and/or cancer-directed surgery	None/Unknown	No/Unknown	No systemic therapy and/or surgical procedures	Alive or dead of other cause	Alive or dead due to cancer	104	Alive
1153460	Married (including common law)	White	49	Female	2010	Rectum	Moderately differentiated; Grade II	Positive histology	8140/3: Adenocarcinoma, NOS	Localized	T2	N0	M0	10	999	77	16	0	One primary only	30	Radiation prior to surgery	Beam radiation	Yes	Systemic therapy before surgery	Alive or dead of other cause	Alive or dead due to cancer	104	Alive
1153493	Divorced	Black	84	Male	2010	Ascending Colon	Moderately differentiated; Grade II	Positive histology	8140/3: Adenocarcinoma, NOS	Regional	T4	N0	M0	10	0	35	25	0	One primary only	30	No radiation and/or cancer-directed surgery	None/Unknown	No/Unknown	No systemic therapy and/or surgical procedures	Dead (attributable to this cancer dx)	Alive or dead due to cancer	12	Dead
1153509	Married (including common law)	Black	36	Female	2010	Descending Colon	Moderately differentiated; Grade II	Positive histology	8140/3: Adenocarcinoma, NOS	Regional	T3	N1	M0	998	0	75	14	2	One primary only	30	No radiation and/or cancer-directed surgery	None/Unknown	Yes	Systemic therapy after surgery	Alive or dead of other cause	Alive or dead due to cancer	104	Alive
1153518	Married (including common law)	Black	85	Male	2010	Ascending Colon	Moderately differentiated; Grade II	Positive histology	8263/3: Adenocarcinoma in tubulovillous adenoma	Localized	T3	N0	M0	998	999	60	17	0	One primary only	40	No radiation and/or cancer-directed surgery	None/Unknown	No/Unknown	No systemic therapy and/or surgical procedures	Dead (attributable to this cancer dx)	Alive or dead due to cancer	1	Dead
1153558	Married (including common law)	Black	69	Female	2010	Rectum	Moderately differentiated; Grade II	Positive histology	8140/3: Adenocarcinoma, NOS	Distant	T2	N0	M1	999	999	999	0	98	One primary only	0	No radiation and/or cancer-directed surgery	None/Unknown	Yes	No systemic therapy and/or surgical procedures	Dead (attributable to this cancer dx)	Alive or dead due to cancer	27	Dead
1153560	Single (never married)	White	34	Female	2010	Rectosigmoid Junction	Poorly differentiated; Grade III	Positive histology	8140/3: Adenocarcinoma, NOS	Distant	T3	N1	M1	999	0	37	11	1	One primary only	30	Radiation prior to surgery	Beam radiation	Yes	Systemic therapy before surgery	Dead (attributable to this cancer dx)	Alive or dead due to cancer	33	Dead
1153634	Married (including common law)	White	41	Female	2010	Rectum	Moderately differentiated; Grade II	Positive histology	8140/3: Adenocarcinoma, NOS	Regional	T3	N1	M0	20	0	40	16	0	One primary only	30	Radiation before and after surgery	Beam radiation	Yes	Systemic therapy both before and after surgery	Alive or dead of other cause	Alive or dead due to cancer	107	Alive
1153667	Married (including common law)	White	85	Male	2010	Descending Colon	Moderately differentiated; Grade II	Positive histology	8140/3: Adenocarcinoma, NOS	Localized	T1	N0	M0	999	0	15	14	0	One primary only	40	No radiation and/or cancer-directed surgery	None/Unknown	No/Unknown	No systemic therapy and/or surgical procedures	Alive or dead of other cause	Alive or dead due to cancer	102	Alive
1153670	Single (never married)	Black	73	Male	2010	Rectum	Moderately differentiated; Grade II	Positive histology	8140/3: Adenocarcinoma, NOS	Regional	T3	N2	M0	998	998	80	0	98	One primary only	0	No radiation and/or cancer-directed surgery	Beam radiation	Yes	No systemic therapy and/or surgical procedures	Dead (attributable to this cancer dx)	Alive or dead due to cancer	61	Dead
1153750	Married (including common law)	White	54	Male	2010	Rectum	Moderately differentiated; Grade II	Positive histology	8140/3: Adenocarcinoma, NOS	Localized	T2	N0	M0	10	0	52	3	0	One primary only	30	No radiation and/or cancer-directed surgery	None/Unknown	Yes	Systemic therapy before surgery	Alive or dead of other cause	Alive or dead due to cancer	103	Alive
1153759	Married (including common law)	White	63	Female	2010	Rectum	Moderately differentiated; Grade II	Positive histology	8140/3: Adenocarcinoma, NOS	Regional	T2	N2	M0	10	0	45	0	98	One primary only	30	Radiation prior to surgery	Beam radiation	Yes	Systemic therapy both before and after surgery	Alive or dead of other cause	Alive or dead due to cancer	105	Alive
1153762	Married (including common law)	White	72	Female	2010	Rectosigmoid Junction	Moderately differentiated; Grade II	Positive histology	8140/3: Adenocarcinoma, NOS	Regional	T1	N1	M0	999	998	999	0	98	One primary only	0	No radiation and/or cancer-directed surgery	None/Unknown	No/Unknown	No systemic therapy and/or surgical procedures	Dead (attributable to this cancer dx)	Alive or dead due to cancer	0	Dead
1153777	Single (never married)	White	55	Male	2010	Ascending Colon	Moderately differentiated; Grade II	Positive histology	8263/3: Adenocarcinoma in tubulovillous adenoma	Regional	T3	N0	M0	999	0	80	25	0	One primary only	40	No radiation and/or cancer-directed surgery	None/Unknown	No/Unknown	No systemic therapy and/or surgical procedures	Alive or dead of other cause	Alive or dead due to cancer	12	Alive
1153829	Single (never married)	White	35	Male	2010	Rectum	Moderately differentiated; Grade II	Positive histology	8140/3: Adenocarcinoma, NOS	Regional	T3	N2	M0	20	0	100	19	10	One primary only	30	Radiation prior to surgery	Beam radiation	Yes	Systemic therapy before surgery	Alive or dead of other cause	Alive or dead due to cancer	106	Alive
1153844	Separated	Other (American Indian/AK Native, Asian/Pacific Islander)	79	Female	2010	Transverse Colon	Well differentiated; Grade I	Positive histology	8140/3: Adenocarcinoma, NOS	Regional	T3	N0	M0	998	999	50	14	0	One primary only	30	No radiation and/or cancer-directed surgery	None/Unknown	No/Unknown	No systemic therapy and/or surgical procedures	Alive or dead of other cause	Alive or dead due to cancer	105	Alive
1153954	Married (including common law)	White	47	Male	2010	Sigmoid Colon	Moderately differentiated; Grade II	Positive histology	8263/3: Adenocarcinoma in tubulovillous adenoma	Regional	T3	N1	M0	998	3	25	8	2	One primary only	30	No radiation and/or cancer-directed surgery	None/Unknown	Yes	Systemic therapy both before and after surgery	Dead (attributable to this cancer dx)	Alive or dead due to cancer	41	Dead
1154026	Single (never married)	Black	85	Male	2010	Cecum	Moderately differentiated; Grade II	Positive histology	8140/3: Adenocarcinoma, NOS	Distant	T3	N2	M1	10	0	74	23	7	One primary only	40	No radiation and/or cancer-directed surgery	None/Unknown	No/Unknown	No systemic therapy and/or surgical procedures	Dead (attributable to this cancer dx)	Alive or dead due to cancer	4	Dead
1154033	Single (never married)	Black	79	Female	2010	Cecum	Moderately differentiated; Grade II	Positive histology	8140/3: Adenocarcinoma, NOS	Regional	T3	N2	M0	999	0	70	21	10	One primary only	40	No radiation and/or cancer-directed surgery	None/Unknown	No/Unknown	No systemic therapy and/or surgical procedures	Dead (attributable to this cancer dx)	Alive or dead due to cancer	80	Dead
1154113	Married (including common law)	White	54	Female	2010	Rectum	Moderately differentiated; Grade II	Positive histology	8263/3: Adenocarcinoma in tubulovillous adenoma	Regional	T3	N1	M0	20	0	60	0	98	One primary only	30	Radiation prior to surgery	Beam radiation	Yes	Systemic therapy before surgery	Alive or dead of other cause	Alive or dead due to cancer	107	Alive
1154118	Widowed	White	85	Female	2010	Transverse Colon	Moderately differentiated; Grade II	Positive histology	8263/3: Adenocarcinoma in tubulovillous adenoma	Regional	T3	N1	M0	10	999	100	97	97	One primary only	32	Radiation after surgery	Beam radiation	No/Unknown	No systemic therapy and/or surgical procedures	Dead (attributable to this cancer dx)	Alive or dead due to cancer	15	Dead
1154134	Widowed	White	85	Male	2010	Cecum	Poorly differentiated; Grade III	Positive histology	8140/3: Adenocarcinoma, NOS	Localized	T3	N0	M0	10	0	50	17	0	One primary only	40	No radiation and/or cancer-directed surgery	None/Unknown	No/Unknown	No systemic therapy and/or surgical procedures	Dead (attributable to this cancer dx)	Alive or dead due to cancer	58	Dead
1154139	Single (never married)	White	69	Female	2010	Ascending Colon	Well differentiated; Grade I	Positive histology	8140/3: Adenocarcinoma, NOS	Localized	T2	N0	M0	998	0	38	3	0	One primary only	40	No radiation and/or cancer-directed surgery	None/Unknown	No/Unknown	No systemic therapy and/or surgical procedures	Alive or dead of other cause	Dead (attributable to causes other than this cancer dx)	7	Dead
1154258	Married (including common law)	White	39	Female	2010	Sigmoid Colon	Moderately differentiated; Grade II	Positive histology	8140/3: Adenocarcinoma, NOS	Regional	T3	N1	M0	20	0	50	13	2	One primary only	30	No radiation and/or cancer-directed surgery	None/Unknown	Yes	Systemic therapy after surgery	Alive or dead of other cause	Alive or dead due to cancer	107	Alive
1154273	Married (including common law)	White	81	Male	2010	Splenic Flexure	Moderately differentiated; Grade II	Positive histology	8480/3: Mucinous adenocarcinoma	Regional	T3	N0	M0	998	0	112	24	0	One primary only	41	No radiation and/or cancer-directed surgery	None/Unknown	No/Unknown	No systemic therapy and/or surgical procedures	Alive or dead of other cause	Alive or dead due to cancer	107	Alive
1154286	Married (including common law)	Other (American Indian/AK Native, Asian/Pacific Islander)	52	Male	2010	Rectosigmoid Junction	Moderately differentiated; Grade II	Positive histology	8140/3: Adenocarcinoma, NOS	Regional	T4	N0	M0	10	0	80	26	0	One primary only	31	No radiation and/or cancer-directed surgery	None/Unknown	No/Unknown	No systemic therapy and/or surgical procedures	Alive or dead of other cause	Alive or dead due to cancer	102	Alive
1154289	Married (including common law)	Other (American Indian/AK Native, Asian/Pacific Islander)	79	Male	2010	Sigmoid Colon	Moderately differentiated; Grade II	Positive histology	8140/3: Adenocarcinoma, NOS	Regional	T3	N0	M0	999	0	25	8	0	One primary only	30	No radiation and/or cancer-directed surgery	None/Unknown	No/Unknown	No systemic therapy and/or surgical procedures	Alive or dead of other cause	Alive or dead due to cancer	96	Alive
1154309	Married (including common law)	White	31	Male	2010	Sigmoid Colon	Moderately differentiated; Grade II	Positive histology	8480/3: Mucinous adenocarcinoma	Regional	T4	N2	M0	20	999	70	12	9	One primary only	30	No radiation and/or cancer-directed surgery	None/Unknown	Yes	Systemic therapy after surgery	Dead (attributable to this cancer dx)	Alive or dead due to cancer	17	Dead
1154340	Single (never married)	White	49	Male	2010	Sigmoid Colon	Poorly differentiated; Grade III	Positive histology	8140/3: Adenocarcinoma, NOS	Localized	T1	N0	M0	997	0	20	15	0	One primary only	30	No radiation and/or cancer-directed surgery	None/Unknown	No/Unknown	No systemic therapy and/or surgical procedures	Alive or dead of other cause	Alive or dead due to cancer	107	Alive
1154418	Divorced	White	53	Male	2010	Rectum	Moderately differentiated; Grade II	Positive histology	8140/3: Adenocarcinoma, NOS	Regional	T3	N0	M0	10	0	999	3	0	One primary only	50	Radiation prior to surgery	Beam radiation	Yes	Systemic therapy both before and after surgery	Alive or dead of other cause	Alive or dead due to cancer	106	Alive
1154463	Single (never married)	Black	32	Female	2010	Sigmoid Colon	Moderately differentiated; Grade II	Positive histology	8210/3: Adenocarcinoma in adenomatous polyp	Regional	T3	N1	M0	20	0	42	9	3	One primary only	40	No radiation and/or cancer-directed surgery	None/Unknown	Yes	Systemic therapy after surgery	Dead (attributable to this cancer dx)	Alive or dead due to cancer	80	Dead
1154480	Widowed	Other (American Indian/AK Native, Asian/Pacific Islander)	78	Female	2010	Rectosigmoid Junction	Moderately differentiated; Grade II	Positive histology	8210/3: Adenocarcinoma in adenomatous polyp	Localized	T1	N0	M0	10	0	999	0	98	One primary only	26	No radiation and/or cancer-directed surgery	None/Unknown	No/Unknown	No systemic therapy and/or surgical procedures	Alive or dead of other cause	Dead (attributable to causes other than this cancer dx)	46	Dead
1154485	Married (including common law)	Other (American Indian/AK Native, Asian/Pacific Islander)	69	Female	2010	Rectosigmoid Junction	Moderately differentiated; Grade II	Positive histology	8210/3: Adenocarcinoma in adenomatous polyp	Regional	T3	N1	M0	10	0	45	9	1	One primary only	30	No radiation and/or cancer-directed surgery	None/Unknown	Yes	Systemic therapy after surgery	Dead (attributable to this cancer dx)	Alive or dead due to cancer	26	Dead
1154502	Single (never married)	Black	57	Male	2010	Rectum	Moderately differentiated; Grade II	Positive histology	8140/3: Adenocarcinoma, NOS	Distant	T3	N1	M1	997	0	40	0	98	One primary only	0	No radiation and/or cancer-directed surgery	Beam radiation	Yes	No systemic therapy and/or surgical procedures	Dead (attributable to this cancer dx)	Alive or dead due to cancer	18	Dead
1154616	Married (including common law)	White	80	Male	2010	Rectum	Moderately differentiated; Grade II	Positive histology	8140/3: Adenocarcinoma, NOS	Localized	T3	N0	M0	20	0	30	12	0	One primary only	30	Radiation prior to surgery	Beam radiation	Yes	Systemic therapy before surgery	Alive or dead of other cause	Alive or dead due to cancer	107	Alive
1154631	Single (never married)	White	46	Female	2010	Sigmoid Colon	Moderately differentiated; Grade II	Positive histology	8140/3: Adenocarcinoma, NOS	Regional	T3	N2	M0	20	10	35	14	5	One primary only	30	No radiation and/or cancer-directed surgery	None/Unknown	Yes	Systemic therapy after surgery	Dead (attributable to this cancer dx)	Alive or dead due to cancer	68	Dead
1154840	Married (including common law)	White	69	Male	2010	Sigmoid Colon	Moderately differentiated; Grade II	Positive histology	8140/3: Adenocarcinoma, NOS	Localized	T1	N0	M0	20	998	40	0	98	One primary only	26	No radiation and/or cancer-directed surgery	None/Unknown	No/Unknown	No systemic therapy and/or surgical procedures	Alive or dead of other cause	Alive or dead due to cancer	96	Alive
1154892	Married (including common law)	White	42	Male	2010	Sigmoid Colon	Moderately differentiated; Grade II	Positive histology	8140/3: Adenocarcinoma, NOS	Distant	T4	N1	M1	10	0	65	20	3	One primary only	30	No radiation and/or cancer-directed surgery	None/Unknown	Yes	Systemic therapy after surgery	Dead (attributable to this cancer dx)	Alive or dead due to cancer	35	Dead
1154904	Married (including common law)	Other (American Indian/AK Native, Asian/Pacific Islander)	47	Male	2010	Hepatic Flexure	Poorly differentiated; Grade III	Positive histology	8140/3: Adenocarcinoma, NOS	Regional	T3	N0	M0	20	0	82	18	0	One primary only	30	No radiation and/or cancer-directed surgery	None/Unknown	No/Unknown	No systemic therapy and/or surgical procedures	Alive or dead of other cause	Alive or dead due to cancer	107	Alive
1154962	Married (including common law)	White	70	Male	2010	Sigmoid Colon	Poorly differentiated; Grade III	Positive histology	8140/3: Adenocarcinoma, NOS	Distant	T4	N1	M0	10	5	43	11	7	One primary only	30	No radiation and/or cancer-directed surgery	None/Unknown	Yes	Systemic therapy after surgery	Dead (attributable to this cancer dx)	Alive or dead due to cancer	27	Dead
1154985	Married (including common law)	White	71	Male	2010	Rectum	Moderately differentiated; Grade II	Positive histology	8210/3: Adenocarcinoma in adenomatous polyp	Localized	T2	N0	M0	998	999	30	0	98	One primary only	0	No radiation and/or cancer-directed surgery	Beam radiation	Yes	No systemic therapy and/or surgical procedures	Alive or dead of other cause	Alive or dead due to cancer	101	Alive
1155001	Single (never married)	White	80	Male	2010	Cecum	Moderately differentiated; Grade II	Positive histology	8140/3: Adenocarcinoma, NOS	Regional	T4	N0	M0	998	0	35	17	0	One primary only	40	No radiation and/or cancer-directed surgery	None/Unknown	No/Unknown	No systemic therapy and/or surgical procedures	Alive or dead of other cause	Dead (attributable to causes other than this cancer dx)	45	Dead
1155057	Widowed	Other (American Indian/AK Native, Asian/Pacific Islander)	81	Female	2010	Rectum	Moderately differentiated; Grade II	Positive histology	8263/3: Adenocarcinoma in tubulovillous adenoma	Regional	T2	N1	M0	998	999	12	0	98	One primary only	0	No radiation and/or cancer-directed surgery	Beam radiation	Yes	No systemic therapy and/or surgical procedures	Dead (attributable to this cancer dx)	Alive or dead due to cancer	2	Dead
1155062	Married (including common law)	White	82	Female	2010	Rectum	Moderately differentiated; Grade II	Positive histology	8140/3: Adenocarcinoma, NOS	Regional	T3	N0	M0	997	999	50	8	0	One primary only	30	No radiation and/or cancer-directed surgery	None/Unknown	No/Unknown	No systemic therapy and/or surgical procedures	Alive or dead of other cause	Dead (attributable to causes other than this cancer dx)	0	Dead
1155074	Single (never married)	White	51	Female	2010	Cecum	Moderately differentiated; Grade II	Positive histology	8140/3: Adenocarcinoma, NOS	Localized	T2	N0	M0	20	0	19	19	0	One primary only	30	No radiation and/or cancer-directed surgery	None/Unknown	No/Unknown	No systemic therapy and/or surgical procedures	Alive or dead of other cause	Alive or dead due to cancer	97	Alive
1155075	Single (never married)	White	82	Male	2010	Rectosigmoid Junction	Undifferentiated; anaplastic; Grade IV	Positive histology	8140/3: Adenocarcinoma, NOS	Regional	T3	N2	M0	10	0	55	24	13	One primary only	30	No radiation and/or cancer-directed surgery	None/Unknown	No/Unknown	No systemic therapy and/or surgical procedures	Dead (attributable to this cancer dx)	Alive or dead due to cancer	17	Dead
1155123	Divorced	Other (American Indian/AK Native, Asian/Pacific Islander)	72	Male	2010	Descending Colon	Poorly differentiated; Grade III	Positive histology	8490/3: Signet ring cell carcinoma	Regional	T3	N2	M0	10	0	70	12	6	One primary only	30	No radiation and/or cancer-directed surgery	None/Unknown	Yes	Systemic therapy after surgery	Dead (attributable to this cancer dx)	Alive or dead due to cancer	35	Dead
1155129	Married (including common law)	White	71	Male	2010	Descending Colon	Moderately differentiated; Grade II	Positive histology	8140/3: Adenocarcinoma, NOS	Regional	T3	N1	M0	20	0	55	12	1	One primary only	40	No radiation and/or cancer-directed surgery	None/Unknown	Yes	Systemic therapy after surgery	Alive or dead of other cause	Alive or dead due to cancer	107	Alive
1155134	Widowed	White	85	Female	2010	Cecum	Moderately differentiated; Grade II	Positive histology	8140/3: Adenocarcinoma, NOS	Localized	T1	N0	M0	20	0	45	18	0	One primary only	40	No radiation and/or cancer-directed surgery	None/Unknown	No/Unknown	No systemic therapy and/or surgical procedures	Alive or dead of other cause	Alive or dead due to cancer	107	Alive
1155172	Single (never married)	White	73	Female	2010	Cecum	Undifferentiated; anaplastic; Grade IV	Positive histology	8480/3: Mucinous adenocarcinoma	Regional	T4	N0	M0	999	0	65	23	0	One primary only	40	No radiation and/or cancer-directed surgery	None/Unknown	No/Unknown	No systemic therapy and/or surgical procedures	Alive or dead of other cause	Alive or dead due to cancer	105	Alive
1155179	Married (including common law)	Other (American Indian/AK Native, Asian/Pacific Islander)	77	Male	2010	Cecum	Moderately differentiated; Grade II	Positive histology	8480/3: Mucinous adenocarcinoma	Localized	T2	N0	M0	20	0	80	9	0	One primary only	40	No radiation and/or cancer-directed surgery	None/Unknown	No/Unknown	No systemic therapy and/or surgical procedures	Alive or dead of other cause	Alive or dead due to cancer	98	Alive
1155183	Married (including common law)	White	77	Female	2010	Rectum	Moderately differentiated; Grade II	Positive histology	8140/3: Adenocarcinoma, NOS	Localized	T3	N0	M0	999	0	30	13	0	One primary only	30	Radiation prior to surgery	Beam radiation	Yes	Systemic therapy before surgery	Dead (attributable to this cancer dx)	Alive or dead due to cancer	93	Dead
1155209	Married (including common law)	Other (American Indian/AK Native, Asian/Pacific Islander)	83	Male	2010	Rectosigmoid Junction	Moderately differentiated; Grade II	Positive histology	8140/3: Adenocarcinoma, NOS	Distant	T4	N2	M1	10	990	37	11	5	One primary only	30	No radiation and/or cancer-directed surgery	None/Unknown	No/Unknown	No systemic therapy and/or surgical procedures	Alive or dead of other cause	Dead (attributable to causes other than this cancer dx)	2	Dead
1155271	Married (including common law)	Other (American Indian/AK Native, Asian/Pacific Islander)	77	Female	2010	Cecum	Moderately differentiated; Grade II	Positive histology	8140/3: Adenocarcinoma, NOS	Regional	T3	N0	M0	10	0	78	18	0	One primary only	30	No radiation and/or cancer-directed surgery	None/Unknown	No/Unknown	No systemic therapy and/or surgical procedures	Alive or dead of other cause	Dead (attributable to causes other than this cancer dx)	96	Dead
1155354	Separated	Black	66	Female	2010	Sigmoid Colon	Moderately differentiated; Grade II	Positive histology	8210/3: Adenocarcinoma in adenomatous polyp	Localized	T1	N0	M0	20	998	999	0	98	One primary only	28	No radiation and/or cancer-directed surgery	None/Unknown	No/Unknown	No systemic therapy and/or surgical procedures	Alive or dead of other cause	Dead (attributable to causes other than this cancer dx)	52	Dead
1155356	Married (including common law)	White	56	Male	2010	Rectum	Moderately differentiated; Grade II	Positive histology	8140/3: Adenocarcinoma, NOS	Localized	T2	N0	M0	998	0	45	30	0	One primary only	30	No radiation and/or cancer-directed surgery	None/Unknown	No/Unknown	No systemic therapy and/or surgical procedures	Alive or dead of other cause	Alive or dead due to cancer	105	Alive
1155376	Married (including common law)	White	71	Female	2010	Ascending Colon	Moderately differentiated; Grade II	Positive histology	8210/3: Adenocarcinoma in adenomatous polyp	Localized	T2	N0	M0	998	0	65	17	0	One primary only	40	No radiation and/or cancer-directed surgery	None/Unknown	No/Unknown	No systemic therapy and/or surgical procedures	Alive or dead of other cause	Alive or dead due to cancer	107	Alive
1155386	Married (including common law)	White	60	Female	2010	Rectum	Moderately differentiated; Grade II	Positive histology	8210/3: Adenocarcinoma in adenomatous polyp	Regional	T2	N1	M0	998	0	12	16	1	One primary only	30	Radiation after surgery	Beam radiation	Yes	Systemic therapy after surgery	Dead (attributable to this cancer dx)	Alive or dead due to cancer	69	Dead
1155421	Married (including common law)	White	63	Male	2010	Cecum	Moderately differentiated; Grade II	Positive histology	8140/3: Adenocarcinoma, NOS	Distant	T3	N1	M1	10	1	40	12	1	One primary only	40	No radiation and/or cancer-directed surgery	None/Unknown	Yes	Systemic therapy after surgery	Dead (attributable to this cancer dx)	Alive or dead due to cancer	11	Dead
1155453	Married (including common law)	White	71	Female	2010	Sigmoid Colon	Moderately differentiated; Grade II	Positive histology	8140/3: Adenocarcinoma, NOS	Localized	T3	N0	M0	20	0	30	17	0	One primary only	40	No radiation and/or cancer-directed surgery	None/Unknown	No/Unknown	No systemic therapy and/or surgical procedures	Alive or dead of other cause	Alive or dead due to cancer	105	Alive
1155471	Married (including common law)	White	50	Female	2010	Rectum	Moderately differentiated; Grade II	Positive histology	8263/3: Adenocarcinoma in tubulovillous adenoma	Regional	T1	N1	M0	20	0	5	31	1	One primary only	30	Radiation after surgery	Beam radiation	Yes	Systemic therapy after surgery	Alive or dead of other cause	Alive or dead due to cancer	105	Alive
1155491	Separated	Other (American Indian/AK Native, Asian/Pacific Islander)	51	Female	2010	Rectum	Poorly differentiated; Grade III	Positive histology	8140/3: Adenocarcinoma, NOS	Regional	T3	N1	M0	20	0	20	11	0	One primary only	30	Radiation prior to surgery	Beam radiation	Yes	Systemic therapy both before and after surgery	Alive or dead of other cause	Alive or dead due to cancer	104	Alive
1155492	Married (including common law)	Other (American Indian/AK Native, Asian/Pacific Islander)	67	Female	2010	Ascending Colon	Moderately differentiated; Grade II	Positive histology	8140/3: Adenocarcinoma, NOS	Localized	T3	N0	M0	20	0	50	27	0	One primary only	40	No radiation and/or cancer-directed surgery	None/Unknown	No/Unknown	No systemic therapy and/or surgical procedures	Alive or dead of other cause	Alive or dead due to cancer	105	Alive
1155545	Married (including common law)	White	72	Female	2010	Cecum	Moderately differentiated; Grade II	Positive histology	8263/3: Adenocarcinoma in tubulovillous adenoma	Distant	T1	N0	M1	20	998	999	0	98	One primary only	0	No radiation and/or cancer-directed surgery	None/Unknown	No/Unknown	No systemic therapy and/or surgical procedures	Dead (attributable to this cancer dx)	Alive or dead due to cancer	1	Dead
1155591	Widowed	White	49	Female	2010	Ascending Colon	Moderately differentiated; Grade II	Positive histology	8140/3: Adenocarcinoma, NOS	Regional	T3	N2	M0	20	0	60	26	5	One primary only	40	No radiation and/or cancer-directed surgery	None/Unknown	Yes	Systemic therapy after surgery	Alive or dead of other cause	Alive or dead due to cancer	105	Alive
1155593	Divorced	White	72	Female	2010	Cecum	Moderately differentiated; Grade II	Positive histology	8480/3: Mucinous adenocarcinoma	Regional	T3	N0	M0	20	0	67	37	0	One primary only	40	No radiation and/or cancer-directed surgery	None/Unknown	No/Unknown	No systemic therapy and/or surgical procedures	Alive or dead of other cause	Alive or dead due to cancer	105	Alive
1155617	Married (including common law)	White	73	Female	2010	Sigmoid Colon	Moderately differentiated; Grade II	Positive histology	8480/3: Mucinous adenocarcinoma	Regional	T3	N0	M0	20	0	23	19	0	One primary only	30	No radiation and/or cancer-directed surgery	None/Unknown	No/Unknown	No systemic therapy and/or surgical procedures	Alive or dead of other cause	Alive or dead due to cancer	105	Alive
1155698	Married (including common law)	Other (American Indian/AK Native, Asian/Pacific Islander)	53	Male	2010	Rectosigmoid Junction	Moderately differentiated; Grade II	Positive histology	8140/3: Adenocarcinoma, NOS	Distant	T3	N1	M1	10	0	100	13	0	One primary only	0	No radiation and/or cancer-directed surgery	None/Unknown	Yes	No systemic therapy and/or surgical procedures	Dead (attributable to this cancer dx)	Alive or dead due to cancer	28	Dead
1155802	Married (including common law)	Other (American Indian/AK Native, Asian/Pacific Islander)	79	Female	2010	Cecum	Moderately differentiated; Grade II	Positive histology	8140/3: Adenocarcinoma, NOS	Distant	T4	N2	M1	10	999	40	16	9	One primary only	40	No radiation and/or cancer-directed surgery	None/Unknown	Yes	Systemic therapy after surgery	Dead (attributable to this cancer dx)	Alive or dead due to cancer	64	Dead
1155827	Married (including common law)	White	51	Female	2010	Sigmoid Colon	Moderately differentiated; Grade II	Positive histology	8140/3: Adenocarcinoma, NOS	Distant	T3	N1	M1	20	0	45	27	2	One primary only	30	No radiation and/or cancer-directed surgery	None/Unknown	Yes	Systemic therapy after surgery	Alive or dead of other cause	Alive or dead due to cancer	106	Alive
1155930	Married (including common law)	Black	51	Female	2010	Rectosigmoid Junction	Moderately differentiated; Grade II	Positive histology	8140/3: Adenocarcinoma, NOS	Distant	T3	N2	M1	10	990	65	22	8	One primary only	30	No radiation and/or cancer-directed surgery	None/Unknown	Yes	Systemic therapy after surgery	Dead (attributable to this cancer dx)	Alive or dead due to cancer	48	Dead
1156140	Married (including common law)	White	60	Male	2010	Rectum	Moderately differentiated; Grade II	Positive histology	8263/3: Adenocarcinoma in tubulovillous adenoma	Regional	T3	N1	M0	20	999	25	15	0	One primary only	30	Radiation before and after surgery	Beam radiation	Yes	Systemic therapy both before and after surgery	Alive or dead of other cause	Dead (attributable to causes other than this cancer dx)	76	Dead
1156156	Married (including common law)	White	61	Male	2010	Cecum	Undifferentiated; anaplastic; Grade IV	Positive histology	8140/3: Adenocarcinoma, NOS	Regional	T3	N2	M0	10	0	50	31	9	One primary only	40	No radiation and/or cancer-directed surgery	None/Unknown	Yes	Systemic therapy after surgery	Dead (attributable to this cancer dx)	Alive or dead due to cancer	18	Dead
1156170	Divorced	Black	64	Female	2010	Splenic Flexure	Moderately differentiated; Grade II	Positive histology	8210/3: Adenocarcinoma in adenomatous polyp	Regional	T3	N2	M0	998	999	5	8	6	One primary only	30	No radiation and/or cancer-directed surgery	None/Unknown	No/Unknown	No systemic therapy and/or surgical procedures	Dead (attributable to this cancer dx)	Alive or dead due to cancer	27	Dead
1156178	Divorced	White	77	Female	2010	Ascending Colon	Moderately differentiated; Grade II	Positive histology	8480/3: Mucinous adenocarcinoma	Regional	T3	N0	M0	999	998	60	0	98	One primary only	0	No radiation and/or cancer-directed surgery	None/Unknown	No/Unknown	No systemic therapy and/or surgical procedures	Alive or dead of other cause	Dead (attributable to causes other than this cancer dx)	8	Dead
1156187	Widowed	Black	70	Male	2010	Cecum	Poorly differentiated; Grade III	Positive histology	8261/3: Adenocarcinoma in villous adenoma	Distant	T4	N1	M1	998	998	999	0	98	One primary only	0	No radiation and/or cancer-directed surgery	None/Unknown	No/Unknown	No systemic therapy and/or surgical procedures	Dead (attributable to this cancer dx)	Alive or dead due to cancer	1	Dead
1156229	Married (including common law)	Black	71	Male	2010	Descending Colon	Moderately differentiated; Grade II	Positive histology	8140/3: Adenocarcinoma, NOS	Regional	T3	N1	M0	998	0	40	13	2	One primary only	40	No radiation and/or cancer-directed surgery	None/Unknown	Yes	Systemic therapy after surgery	Alive or dead of other cause	Alive or dead due to cancer	104	Alive
1156232	Divorced	White	50	Male	2010	Ascending Colon	Moderately differentiated; Grade II	Positive histology	8263/3: Adenocarcinoma in tubulovillous adenoma	Distant	T1	N0	M1	10	998	999	0	98	One primary only	0	No radiation and/or cancer-directed surgery	None/Unknown	Yes	No systemic therapy and/or surgical procedures	Dead (attributable to this cancer dx)	Alive or dead due to cancer	9	Dead
1156241	Divorced	White	59	Female	2010	Sigmoid Colon	Moderately differentiated; Grade II	Positive histology	8261/3: Adenocarcinoma in villous adenoma	Regional	T1	N1	M0	20	0	999	13	2	One primary only	30	No radiation and/or cancer-directed surgery	None/Unknown	Yes	Systemic therapy after surgery	Alive or dead of other cause	Alive or dead due to cancer	103	Alive
1156253	Married (including common law)	White	64	Female	2010	Cecum	Poorly differentiated; Grade III	Positive histology	8140/3: Adenocarcinoma, NOS	Localized	T3	N0	M0	20	0	47	28	0	One primary only	40	No radiation and/or cancer-directed surgery	None/Unknown	No/Unknown	No systemic therapy and/or surgical procedures	Alive or dead of other cause	Alive or dead due to cancer	103	Alive
1156260	Married (including common law)	Other (American Indian/AK Native, Asian/Pacific Islander)	38	Male	2010	Rectum	Moderately differentiated; Grade II	Positive histology	8140/3: Adenocarcinoma, NOS	Distant	T3	N1	M1	10	999	70	0	98	One primary only	0	No radiation and/or cancer-directed surgery	Beam radiation	Yes	No systemic therapy and/or surgical procedures	Dead (attributable to this cancer dx)	Alive or dead due to cancer	30	Dead
1156286	Married (including common law)	White	76	Male	2010	Splenic Flexure	Moderately differentiated; Grade II	Positive histology	8140/3: Adenocarcinoma, NOS	Regional	T3	N1	M0	998	999	35	5	3	One primary only	40	No radiation and/or cancer-directed surgery	None/Unknown	Yes	Systemic therapy after surgery	Dead (attributable to this cancer dx)	Alive or dead due to cancer	60	Dead
1156402	Widowed	White	85	Female	2010	Rectosigmoid Junction	Moderately differentiated; Grade II	Positive histology	8140/3: Adenocarcinoma, NOS	Distant	T3	N1	M1	10	0	50	7	1	One primary only	30	No radiation and/or cancer-directed surgery	None/Unknown	No/Unknown	No systemic therapy and/or surgical procedures	Dead (attributable to this cancer dx)	Alive or dead due to cancer	37	Dead
1156420	Widowed	White	85	Female	2010	Cecum	Moderately differentiated; Grade II	Positive histology	8263/3: Adenocarcinoma in tubulovillous adenoma	Regional	T3	N1	M0	998	0	40	12	1	One primary only	40	No radiation and/or cancer-directed surgery	None/Unknown	No/Unknown	No systemic therapy and/or surgical procedures	Alive or dead of other cause	Dead (attributable to causes other than this cancer dx)	64	Dead
1156425	Widowed	White	64	Male	2010	Cecum	Moderately differentiated; Grade II	Positive histology	8140/3: Adenocarcinoma, NOS	Localized	T3	N0	M0	20	0	75	20	0	One primary only	40	No radiation and/or cancer-directed surgery	None/Unknown	No/Unknown	No systemic therapy and/or surgical procedures	Alive or dead of other cause	Alive or dead due to cancer	104	Alive
1156426	Widowed	White	77	Male	2010	Sigmoid Colon	Moderately differentiated; Grade II	Positive histology	8263/3: Adenocarcinoma in tubulovillous adenoma	Localized	T1	N0	M0	998	998	3	0	98	One primary only	28	No radiation and/or cancer-directed surgery	None/Unknown	No/Unknown	No systemic therapy and/or surgical procedures	Alive or dead of other cause	Dead (attributable to causes other than this cancer dx)	50	Dead
1156448	Married (including common law)	White	72	Male	2010	Transverse Colon	Moderately differentiated; Grade II	Positive histology	8140/3: Adenocarcinoma, NOS	Distant	T3	N2	M1	10	990	85	15	5	One primary only	30	No radiation and/or cancer-directed surgery	None/Unknown	Yes	Systemic therapy after surgery	Dead (attributable to this cancer dx)	Alive or dead due to cancer	3	Dead
1156470	Single (never married)	White	73	Male	2010	Ascending Colon	Moderately differentiated; Grade II	Positive histology	8480/3: Mucinous adenocarcinoma	Regional	T4	N0	M0	998	0	50	19	0	One primary only	30	No radiation and/or cancer-directed surgery	None/Unknown	Yes	Systemic therapy after surgery	Alive or dead of other cause	Alive or dead due to cancer	104	Alive
1156539	Married (including common law)	White	69	Male	2010	Rectum	Moderately differentiated; Grade II	Positive histology	8210/3: Adenocarcinoma in adenomatous polyp	Localized	T2	N0	M0	20	0	18	0	98	One primary only	26	No radiation and/or cancer-directed surgery	None/Unknown	No/Unknown	No systemic therapy and/or surgical procedures	Alive or dead of other cause	Dead (attributable to causes other than this cancer dx)	57	Dead
1156560	Married (including common law)	Other (American Indian/AK Native, Asian/Pacific Islander)	79	Male	2010	Sigmoid Colon	Moderately differentiated; Grade II	Positive histology	8210/3: Adenocarcinoma in adenomatous polyp	Localized	T1	N0	M0	20	0	16	9	0	One primary only	30	No radiation and/or cancer-directed surgery	None/Unknown	No/Unknown	No systemic therapy and/or surgical procedures	Dead (attributable to this cancer dx)	Alive or dead due to cancer	93	Dead
1156598	Divorced	White	49	Male	2010	Sigmoid Colon	Poorly differentiated; Grade III	Positive histology	8140/3: Adenocarcinoma, NOS	Regional	T3	N2	M0	20	0	28	8	8	One primary only	30	No radiation and/or cancer-directed surgery	None/Unknown	Yes	Systemic therapy after surgery	Dead (attributable to this cancer dx)	Alive or dead due to cancer	17	Dead
1156655	Married (including common law)	White	81	Male	2010	Cecum	Moderately differentiated; Grade II	Positive histology	8140/3: Adenocarcinoma, NOS	Regional	T3	N0	M0	20	0	32	19	0	One primary only	40	No radiation and/or cancer-directed surgery	None/Unknown	No/Unknown	No systemic therapy and/or surgical procedures	Dead (missing/unknown COD)	Dead (missing/unknown COD)	49	Dead
1156705	Divorced	Other (American Indian/AK Native, Asian/Pacific Islander)	50	Female	2010	Descending Colon	Moderately differentiated; Grade II	Positive histology	8480/3: Mucinous adenocarcinoma	Regional	T3	N1	M0	20	0	63	22	1	One primary only	40	No radiation and/or cancer-directed surgery	None/Unknown	Yes	Systemic therapy after surgery	Alive or dead of other cause	Alive or dead due to cancer	103	Alive
1156718	Married (including common law)	White	55	Male	2010	Rectum	Moderately differentiated; Grade II	Positive histology	8210/3: Adenocarcinoma in adenomatous polyp	Localized	T1	N0	M0	20	0	13	10	0	One primary only	50	No radiation and/or cancer-directed surgery	None/Unknown	No/Unknown	No systemic therapy and/or surgical procedures	Alive or dead of other cause	Alive or dead due to cancer	103	Alive
1157059	Single (never married)	White	24	Male	2010	Sigmoid Colon	Poorly differentiated; Grade III	Positive histology	8140/3: Adenocarcinoma, NOS	Regional	T3	N2	M0	20	0	56	25	6	One primary only	30	No radiation and/or cancer-directed surgery	None/Unknown	Yes	Systemic therapy after surgery	Alive or dead of other cause	Alive or dead due to cancer	101	Alive
1157138	Divorced	White	57	Male	2010	Rectosigmoid Junction	Moderately differentiated; Grade II	Positive histology	8140/3: Adenocarcinoma, NOS	Distant	T3	N1	M1	20	999	40	8	0	One primary only	30	No radiation and/or cancer-directed surgery	None/Unknown	Yes	Systemic therapy before surgery	Alive or dead of other cause	Alive or dead due to cancer	106	Alive
1157146	Widowed	White	70	Male	2010	Descending Colon	Moderately differentiated; Grade II	Positive histology	8140/3: Adenocarcinoma, NOS	Localized	T2	N0	M0	20	0	30	11	0	One primary only	40	No radiation and/or cancer-directed surgery	None/Unknown	No/Unknown	No systemic therapy and/or surgical procedures	Alive or dead of other cause	Alive or dead due to cancer	105	Alive
1157152	Widowed	White	85	Female	2010	Rectum	Moderately differentiated; Grade II	Positive histology	8140/3: Adenocarcinoma, NOS	Regional	T3	N1	M0	20	0	35	40	2	One primary only	30	No radiation and/or cancer-directed surgery	None/Unknown	No/Unknown	No systemic therapy and/or surgical procedures	Dead (attributable to this cancer dx)	Alive or dead due to cancer	2	Dead
1157178	Divorced	White	69	Male	2010	Rectum	Moderately differentiated; Grade II	Positive histology	8210/3: Adenocarcinoma in adenomatous polyp	Localized	T1	N0	M0	20	0	15	0	98	One primary only	26	No radiation and/or cancer-directed surgery	None/Unknown	No/Unknown	No systemic therapy and/or surgical procedures	Alive or dead of other cause	Dead (attributable to causes other than this cancer dx)	66	Dead
1157222	Married (including common law)	White	59	Female	2010	Ascending Colon	Moderately differentiated; Grade II	Positive histology	8140/3: Adenocarcinoma, NOS	Regional	T3	N0	M0	20	0	80	18	0	One primary only	40	No radiation and/or cancer-directed surgery	None/Unknown	No/Unknown	No systemic therapy and/or surgical procedures	Alive or dead of other cause	Alive or dead due to cancer	102	Alive
1157274	Married (including common law)	White	83	Male	2010	Splenic Flexure	Poorly differentiated; Grade III	Positive histology	8140/3: Adenocarcinoma, NOS	Regional	T4	N1	M0	10	999	70	24	1	One primary only	40	No radiation and/or cancer-directed surgery	None/Unknown	No/Unknown	No systemic therapy and/or surgical procedures	Alive or dead of other cause	Dead (attributable to causes other than this cancer dx)	1	Dead
1157384	Single (never married)	White	50	Male	2010	Rectum	Moderately differentiated; Grade II	Positive histology	8140/3: Adenocarcinoma, NOS	Regional	T3	N0	M0	20	0	60	8	0	One primary only	30	Radiation prior to surgery	Beam radiation	Yes	Systemic therapy before surgery	Alive or dead of other cause	Alive or dead due to cancer	103	Alive
1157386	Divorced	Other (American Indian/AK Native, Asian/Pacific Islander)	70	Female	2010	Rectosigmoid Junction	Moderately differentiated; Grade II	Positive histology	8140/3: Adenocarcinoma, NOS	Localized	T3	N0	M0	10	0	40	11	0	One primary only	30	No radiation and/or cancer-directed surgery	None/Unknown	No/Unknown	No systemic therapy and/or surgical procedures	Alive or dead of other cause	Alive or dead due to cancer	103	Alive
1157487	Widowed	Other (American Indian/AK Native, Asian/Pacific Islander)	83	Male	2010	Rectum	Moderately differentiated; Grade II	Positive histology	8140/3: Adenocarcinoma, NOS	Regional	T3	N0	M0	999	998	46	0	98	One primary only	0	No radiation and/or cancer-directed surgery	Radiation, NOS method or source not specified	Yes	No systemic therapy and/or surgical procedures	Dead (attributable to this cancer dx)	Alive or dead due to cancer	37	Dead
1157518	Married (including common law)	Other (American Indian/AK Native, Asian/Pacific Islander)	59	Female	2010	Appendix	Moderately differentiated; Grade II	Positive histology	8480/3: Mucinous adenocarcinoma	Localized	T3	N0	M0	20	0	35	16	0	One primary only	40	No radiation and/or cancer-directed surgery	None/Unknown	No/Unknown	No systemic therapy and/or surgical procedures	Dead (attributable to this cancer dx)	Alive or dead due to cancer	54	Dead
1157543	Married (including common law)	White	66	Female	2010	Hepatic Flexure	Moderately differentiated; Grade II	Positive histology	8263/3: Adenocarcinoma in tubulovillous adenoma	Localized	T2	N0	M0	20	0	20	30	0	One primary only	40	No radiation and/or cancer-directed surgery	None/Unknown	No/Unknown	No systemic therapy and/or surgical procedures	Dead (attributable to this cancer dx)	Alive or dead due to cancer	36	Dead
1157580	Married (including common law)	White	51	Female	2010	Sigmoid Colon	Moderately differentiated; Grade II	Positive histology	8140/3: Adenocarcinoma, NOS	Distant	T4	N2	M1	10	0	37	15	8	One primary only	30	No radiation and/or cancer-directed surgery	None/Unknown	No/Unknown	No systemic therapy and/or surgical procedures	Dead (attributable to this cancer dx)	Alive or dead due to cancer	55	Dead
1157686	Single (never married)	Other (American Indian/AK Native, Asian/Pacific Islander)	76	Male	2010	Descending Colon	Moderately differentiated; Grade II	Positive histology	8140/3: Adenocarcinoma, NOS	Regional	T3	N1	M0	10	0	53	12	1	One primary only	40	No radiation and/or cancer-directed surgery	None/Unknown	No/Unknown	No systemic therapy and/or surgical procedures	Alive or dead of other cause	Dead (attributable to causes other than this cancer dx)	89	Dead
1157689	Married (including common law)	White	71	Male	2010	Ascending Colon	Moderately differentiated; Grade II	Positive histology	8140/3: Adenocarcinoma, NOS	Regional	T3	N1	M0	20	0	20	26	3	One primary only	40	No radiation and/or cancer-directed surgery	None/Unknown	Yes	Systemic therapy after surgery	Alive or dead of other cause	Dead (attributable to causes other than this cancer dx)	39	Dead
1157713	Married (including common law)	White	62	Male	2010	Rectum	Moderately differentiated; Grade II	Positive histology	8140/3: Adenocarcinoma, NOS	Regional	T2	N2	M0	20	0	20	24	4	One primary only	30	Radiation after surgery	Beam radiation	Yes	Systemic therapy after surgery	Dead (attributable to this cancer dx)	Alive or dead due to cancer	75	Dead
1157718	Widowed	White	85	Female	2010	Hepatic Flexure	Moderately differentiated; Grade II	Positive histology	8140/3: Adenocarcinoma, NOS	Regional	T3	N2	M0	998	990	30	10	8	One primary only	70	No radiation and/or cancer-directed surgery	None/Unknown	No/Unknown	No systemic therapy and/or surgical procedures	Dead (attributable to this cancer dx)	Alive or dead due to cancer	31	Dead
1157727	Married (including common law)	White	63	Female	2010	Hepatic Flexure	Moderately differentiated; Grade II	Positive histology	8263/3: Adenocarcinoma in tubulovillous adenoma	Localized	T1	N0	M0	20	0	40	24	0	One primary only	30	No radiation and/or cancer-directed surgery	None/Unknown	No/Unknown	No systemic therapy and/or surgical procedures	Alive or dead of other cause	Alive or dead due to cancer	102	Alive
1157732	Married (including common law)	Other (American Indian/AK Native, Asian/Pacific Islander)	70	Male	2010	Ascending Colon	Moderately differentiated; Grade II	Positive histology	8263/3: Adenocarcinoma in tubulovillous adenoma	Localized	T1	N0	M0	998	0	10	8	0	One primary only	30	No radiation and/or cancer-directed surgery	None/Unknown	No/Unknown	No systemic therapy and/or surgical procedures	Alive or dead of other cause	Alive or dead due to cancer	102	Alive
1157739	Married (including common law)	White	65	Male	2010	Sigmoid Colon	Moderately differentiated; Grade II	Positive histology	8140/3: Adenocarcinoma, NOS	Regional	T2	N1	M0	20	0	25	30	2	One primary only	30	No radiation and/or cancer-directed surgery	None/Unknown	Yes	Systemic therapy after surgery	Alive or dead of other cause	Alive or dead due to cancer	102	Alive
1157751	Married (including common law)	White	78	Female	2010	Hepatic Flexure	Moderately differentiated; Grade II	Positive histology	8481/3: Mucin-producing adenocarcinoma	Regional	T4	N0	M0	10	0	80	34	0	One primary only	40	No radiation and/or cancer-directed surgery	None/Unknown	No/Unknown	No systemic therapy and/or surgical procedures	Alive or dead of other cause	Dead (attributable to causes other than this cancer dx)	15	Dead
1157809	Single (never married)	White	65	Female	2010	Large Intestine, NOS	Moderately differentiated; Grade II	Positive histology	8140/3: Adenocarcinoma, NOS	Localized	T2	N0	M0	20	0	46	16	0	One primary only	30	No radiation and/or cancer-directed surgery	None/Unknown	No/Unknown	No systemic therapy and/or surgical procedures	Dead (attributable to this cancer dx)	Alive or dead due to cancer	96	Dead
1157813	Married (including common law)	White	67	Female	2010	Cecum	Moderately differentiated; Grade II	Positive histology	8210/3: Adenocarcinoma in adenomatous polyp	Localized	T1	N0	M0	998	0	1	18	0	One primary only	30	No radiation and/or cancer-directed surgery	None/Unknown	No/Unknown	No systemic therapy and/or surgical procedures	Alive or dead of other cause	Alive or dead due to cancer	103	Alive
1157822	Divorced	White	77	Female	2010	Sigmoid Colon	Moderately differentiated; Grade II	Positive histology	8140/3: Adenocarcinoma, NOS	Localized	T2	N0	M0	20	0	8	1	0	One primary only	30	No radiation and/or cancer-directed surgery	None/Unknown	No/Unknown	No systemic therapy and/or surgical procedures	Alive or dead of other cause	Alive or dead due to cancer	103	Alive
1157856	Single (never married)	Black	56	Male	2010	Ascending Colon	Moderately differentiated; Grade II	Positive histology	8263/3: Adenocarcinoma in tubulovillous adenoma	Distant	T4	N0	M1	20	0	50	5	0	One primary only	41	No radiation and/or cancer-directed surgery	None/Unknown	Yes	Systemic therapy after surgery	Dead (attributable to this cancer dx)	Alive or dead due to cancer	70	Dead
1157893	Married (including common law)	White	55	Male	2010	Rectum	Moderately differentiated; Grade II	Positive histology	8140/3: Adenocarcinoma, NOS	Regional	T3	N0	M0	20	0	999	6	0	One primary only	50	Radiation prior to surgery	Beam radiation	Yes	Systemic therapy both before and after surgery	Alive or dead of other cause	Alive or dead due to cancer	103	Alive
1157960	Married (including common law)	Other (American Indian/AK Native, Asian/Pacific Islander)	68	Male	2010	Sigmoid Colon	Moderately differentiated; Grade II	Positive histology	8140/3: Adenocarcinoma, NOS	Distant	T1	N0	M1	10	998	999	0	98	One primary only	0	No radiation and/or cancer-directed surgery	None/Unknown	Yes	No systemic therapy and/or surgical procedures	Dead (attributable to this cancer dx)	Alive or dead due to cancer	16	Dead
1157962	Married (including common law)	White	50	Male	2010	Cecum	Moderately differentiated; Grade II	Positive histology	8480/3: Mucinous adenocarcinoma	Localized	T3	N0	M0	20	0	53	10	0	One primary only	40	No radiation and/or cancer-directed surgery	None/Unknown	Yes	Systemic therapy after surgery	Alive or dead of other cause	Alive or dead due to cancer	102	Alive
1157977	Married (including common law)	Other (American Indian/AK Native, Asian/Pacific Islander)	62	Female	2010	Rectum	Moderately differentiated; Grade II	Positive histology	8210/3: Adenocarcinoma in adenomatous polyp	Localized	T3	N0	M0	999	999	999	17	0	One primary only	26	No radiation and/or cancer-directed surgery	None/Unknown	No/Unknown	No systemic therapy and/or surgical procedures	Alive or dead of other cause	Alive or dead due to cancer	105	Alive
1158039	Divorced	White	45	Male	2010	Ascending Colon	Moderately differentiated; Grade II	Positive histology	8480/3: Mucinous adenocarcinoma	Distant	T3	N0	M1	999	999	50	14	0	One primary only	40	No radiation and/or cancer-directed surgery	None/Unknown	Yes	Systemic therapy after surgery	Dead (attributable to this cancer dx)	Alive or dead due to cancer	34	Dead
1158044	Divorced	Black	61	Male	2010	Rectum	Moderately differentiated; Grade II	Positive histology	8140/3: Adenocarcinoma, NOS	Distant	T3	N1	M1	10	0	54	0	98	One primary only	0	No radiation and/or cancer-directed surgery	None/Unknown	Yes	No systemic therapy and/or surgical procedures	Dead (attributable to this cancer dx)	Alive or dead due to cancer	25	Dead
1158063	Single (never married)	Black	60	Female	2010	Ascending Colon	Moderately differentiated; Grade II	Positive histology	8140/3: Adenocarcinoma, NOS	Distant	T3	N2	M1	10	1	78	11	5	One primary only	40	No radiation and/or cancer-directed surgery	None/Unknown	Yes	Systemic therapy both before and after surgery	Dead (attributable to this cancer dx)	Alive or dead due to cancer	16	Dead
1158093	Married (including common law)	Black	43	Female	2010	Cecum	Moderately differentiated; Grade II	Positive histology	8140/3: Adenocarcinoma, NOS	Localized	T3	N0	M0	20	0	999	30	0	One primary only	40	No radiation and/or cancer-directed surgery	None/Unknown	Yes	Systemic therapy after surgery	Alive or dead of other cause	Alive or dead due to cancer	96	Alive
1158185	Married (including common law)	Black	58	Female	2010	Rectum	Moderately differentiated; Grade II	Positive histology	8140/3: Adenocarcinoma, NOS	Regional	T3	N2	M0	10	0	23	17	0	One primary only	60	Radiation prior to surgery	Beam radiation	Yes	Systemic therapy before surgery	Alive or dead of other cause	Alive or dead due to cancer	107	Alive
1158204	Divorced	Other (American Indian/AK Native, Asian/Pacific Islander)	61	Female	2010	Ascending Colon	Moderately differentiated; Grade II	Positive histology	8140/3: Adenocarcinoma, NOS	Distant	T4	N2	M1	10	990	66	19	18	One primary only	70	No radiation and/or cancer-directed surgery	None/Unknown	Yes	Systemic therapy after surgery	Dead (attributable to this cancer dx)	Alive or dead due to cancer	13	Dead
1158208	Widowed	Other (American Indian/AK Native, Asian/Pacific Islander)	50	Female	2010	Rectum	Moderately differentiated; Grade II	Positive histology	8140/3: Adenocarcinoma, NOS	Regional	T3	N1	M0	20	0	40	7	0	One primary only	50	Radiation prior to surgery	Beam radiation	Yes	Systemic therapy both before and after surgery	Dead (attributable to this cancer dx)	Alive or dead due to cancer	69	Dead
1158316	Married (including common law)	Other (American Indian/AK Native, Asian/Pacific Islander)	54	Female	2010	Rectum	Moderately differentiated; Grade II	Positive histology	8140/3: Adenocarcinoma, NOS	Localized	T1	N0	M0	20	0	17	11	0	One primary only	30	No radiation and/or cancer-directed surgery	None/Unknown	No/Unknown	No systemic therapy and/or surgical procedures	Alive or dead of other cause	Alive or dead due to cancer	105	Alive
1158330	Single (never married)	White	58	Female	2010	Rectum	Moderately differentiated; Grade II	Positive histology	8140/3: Adenocarcinoma, NOS	Localized	T3	N0	M0	20	0	80	23	0	One primary only	30	No radiation and/or cancer-directed surgery	None/Unknown	No/Unknown	No systemic therapy and/or surgical procedures	Alive or dead of other cause	Alive or dead due to cancer	104	Alive
1158331	Single (never married)	Other (American Indian/AK Native, Asian/Pacific Islander)	62	Female	2010	Sigmoid Colon	Moderately differentiated; Grade II	Positive histology	8140/3: Adenocarcinoma, NOS	Distant	T4	N0	M1	10	0	50	3	0	One primary only	40	No radiation and/or cancer-directed surgery	None/Unknown	Yes	Systemic therapy before surgery	Dead (attributable to this cancer dx)	Alive or dead due to cancer	11	Dead
1158332	Single (never married)	White	67	Male	2010	Cecum	Well differentiated; Grade I	Positive histology	8263/3: Adenocarcinoma in tubulovillous adenoma	Distant	T2	N2	M1	999	990	85	33	7	One primary only	41	No radiation and/or cancer-directed surgery	None/Unknown	Yes	Systemic therapy after surgery	Dead (attributable to this cancer dx)	Alive or dead due to cancer	17	Dead
1158340	Divorced	White	55	Male	2010	Rectum	Moderately differentiated; Grade II	Positive histology	8140/3: Adenocarcinoma, NOS	Regional	T3	N1	M0	10	0	48	22	1	One primary only	30	Radiation after surgery	Beam radiation	Yes	Systemic therapy after surgery	Alive or dead of other cause	Alive or dead due to cancer	74	Alive
1158343	Married (including common law)	Other (American Indian/AK Native, Asian/Pacific Islander)	65	Male	2010	Rectum	Moderately differentiated; Grade II	Positive histology	8140/3: Adenocarcinoma, NOS	Distant	T4	N1	M1	10	999	51	0	98	One primary only	0	No radiation and/or cancer-directed surgery	Beam radiation	Yes	No systemic therapy and/or surgical procedures	Dead (attributable to this cancer dx)	Alive or dead due to cancer	1	Dead
1158352	Married (including common law)	Other (American Indian/AK Native, Asian/Pacific Islander)	48	Female	2010	Rectum	Moderately differentiated; Grade II	Positive histology	8140/3: Adenocarcinoma, NOS	Regional	T3	N1	M0	20	0	40	26	2	One primary only	30	Radiation prior to surgery	Beam radiation	Yes	Systemic therapy before surgery	Alive or dead of other cause	Alive or dead due to cancer	104	Alive
1158443	Divorced	White	63	Female	2010	Ascending Colon	Well differentiated; Grade I	Positive histology	8140/3: Adenocarcinoma, NOS	Localized	T1	N0	M0	20	0	3	22	0	One primary only	40	No radiation and/or cancer-directed surgery	None/Unknown	No/Unknown	No systemic therapy and/or surgical procedures	Alive or dead of other cause	Alive or dead due to cancer	102	Alive
1158461	Widowed	White	85	Male	2010	Cecum	Moderately differentiated; Grade II	Positive histology	8140/3: Adenocarcinoma, NOS	Regional	T4	N2	M0	20	0	35	15	5	One primary only	50	No radiation and/or cancer-directed surgery	None/Unknown	Yes	Systemic therapy after surgery	Dead (attributable to this cancer dx)	Alive or dead due to cancer	16	Dead
1158490	Married (including common law)	White	66	Male	2010	Ascending Colon	Moderately differentiated; Grade II	Positive histology	8140/3: Adenocarcinoma, NOS	Localized	T1	N0	M0	998	0	27	14	0	One primary only	40	No radiation and/or cancer-directed surgery	None/Unknown	No/Unknown	No systemic therapy and/or surgical procedures	Alive or dead of other cause	Alive or dead due to cancer	103	Alive
1158530	Widowed	White	75	Female	2010	Hepatic Flexure	Moderately differentiated; Grade II	Positive histology	8140/3: Adenocarcinoma, NOS	Regional	T3	N0	M0	20	0	35	14	0	One primary only	40	No radiation and/or cancer-directed surgery	None/Unknown	No/Unknown	No systemic therapy and/or surgical procedures	Alive or dead of other cause	Dead (attributable to causes other than this cancer dx)	2	Dead
1158603	Married (including common law)	Other (American Indian/AK Native, Asian/Pacific Islander)	68	Female	2010	Rectum	Moderately differentiated; Grade II	Positive histology	8210/3: Adenocarcinoma in adenomatous polyp	Localized	T1	N0	M0	20	0	7	16	0	One primary only	30	No radiation and/or cancer-directed surgery	None/Unknown	No/Unknown	No systemic therapy and/or surgical procedures	Alive or dead of other cause	Alive or dead due to cancer	99	Alive
1158652	Divorced	White	83	Female	2010	Cecum	Moderately differentiated; Grade II	Positive histology	8140/3: Adenocarcinoma, NOS	Localized	T3	N0	M0	10	990	56	14	0	One primary only	40	No radiation and/or cancer-directed surgery	None/Unknown	No/Unknown	No systemic therapy and/or surgical procedures	Alive or dead of other cause	Alive or dead due to cancer	103	Alive
1158674	Single (never married)	White	52	Female	2010	Ascending Colon	Moderately differentiated; Grade II	Positive histology	8140/3: Adenocarcinoma, NOS	Localized	T3	N0	M0	20	0	35	18	0	One primary only	40	No radiation and/or cancer-directed surgery	None/Unknown	No/Unknown	No systemic therapy and/or surgical procedures	Alive or dead of other cause	Alive or dead due to cancer	101	Alive
1158692	Married (including common law)	White	65	Male	2010	Rectum	Moderately differentiated; Grade II	Positive histology	8140/3: Adenocarcinoma, NOS	Regional	T2	N2	M0	20	0	24	24	5	One primary only	30	Radiation after surgery	Beam radiation	Yes	Systemic therapy after surgery	Alive or dead of other cause	Alive or dead due to cancer	101	Alive
1158733	Single (never married)	White	59	Male	2010	Rectum	Well differentiated; Grade I	Positive histology	8140/3: Adenocarcinoma, NOS	Localized	T3	N0	M0	20	0	42	22	0	One primary only	30	Radiation prior to surgery	Beam radiation	Yes	Systemic therapy both before and after surgery	Alive or dead of other cause	Alive or dead due to cancer	105	Alive
1158737	Unknown	White	63	Female	2010	Rectosigmoid Junction	Moderately differentiated; Grade II	Positive histology	8140/3: Adenocarcinoma, NOS	Localized	T3	N0	M0	10	0	80	15	0	One primary only	30	Radiation prior to surgery	Beam radiation	Yes	Systemic therapy before surgery	Alive or dead of other cause	Dead (attributable to causes other than this cancer dx)	28	Dead
1158775	Married (including common law)	White	63	Female	2010	Cecum	Moderately differentiated; Grade II	Positive histology	8210/3: Adenocarcinoma in adenomatous polyp	Regional	T3	N1	M0	998	0	30	23	2	One primary only	40	No radiation and/or cancer-directed surgery	None/Unknown	Yes	Systemic therapy after surgery	Alive or dead of other cause	Alive or dead due to cancer	103	Alive
1158834	Married (including common law)	Other (American Indian/AK Native, Asian/Pacific Islander)	59	Male	2010	Sigmoid Colon	Moderately differentiated; Grade II	Positive histology	8140/3: Adenocarcinoma, NOS	Localized	T3	N0	M0	999	0	61	27	0	One primary only	30	No radiation and/or cancer-directed surgery	None/Unknown	No/Unknown	No systemic therapy and/or surgical procedures	Alive or dead of other cause	Alive or dead due to cancer	101	Alive
1158919	Married (including common law)	White	61	Female	2010	Sigmoid Colon	Well differentiated; Grade I	Positive histology	8140/3: Adenocarcinoma, NOS	Localized	T1	N0	M0	20	0	22	9	0	One primary only	30	No radiation and/or cancer-directed surgery	None/Unknown	No/Unknown	No systemic therapy and/or surgical procedures	Alive or dead of other cause	Alive or dead due to cancer	100	Alive
1158966	Single (never married)	White	62	Female	2010	Rectosigmoid Junction	Poorly differentiated; Grade III	Positive histology	8140/3: Adenocarcinoma, NOS	Distant	T4	N0	M0	998	998	999	0	98	One primary only	0	No radiation and/or cancer-directed surgery	None/Unknown	No/Unknown	No systemic therapy and/or surgical procedures	Dead (attributable to this cancer dx)	Alive or dead due to cancer	11	Dead
1159067	Married (including common law)	Other (American Indian/AK Native, Asian/Pacific Islander)	76	Male	2010	Hepatic Flexure	Poorly differentiated; Grade III	Positive histology	8140/3: Adenocarcinoma, NOS	Localized	T3	N0	M0	20	0	18	8	0	One primary only	30	No radiation and/or cancer-directed surgery	None/Unknown	No/Unknown	No systemic therapy and/or surgical procedures	Alive or dead of other cause	Alive or dead due to cancer	106	Alive
1159098	Married (including common law)	Other (American Indian/AK Native, Asian/Pacific Islander)	80	Male	2010	Sigmoid Colon	Moderately differentiated; Grade II	Positive histology	8140/3: Adenocarcinoma, NOS	Regional	T3	N0	M0	20	0	60	12	0	One primary only	30	No radiation and/or cancer-directed surgery	None/Unknown	No/Unknown	No systemic therapy and/or surgical procedures	Alive or dead of other cause	Dead (attributable to causes other than this cancer dx)	0	Dead
1159132	Single (never married)	White	48	Female	2010	Rectosigmoid Junction	Well differentiated; Grade I	Positive histology	8140/3: Adenocarcinoma, NOS	Localized	T3	N0	M0	998	0	60	5	0	One primary only	30	Radiation prior to surgery	Beam radiation	Yes	Systemic therapy both before and after surgery	Dead (attributable to this cancer dx)	Alive or dead due to cancer	41	Dead
1159135	Married (including common law)	White	84	Female	2010	Rectosigmoid Junction	Moderately differentiated; Grade II	Positive histology	8140/3: Adenocarcinoma, NOS	Regional	T4	N1	M0	998	0	65	10	1	One primary only	30	Radiation after surgery	Beam radiation	Yes	Systemic therapy after surgery	Alive or dead of other cause	Dead (attributable to causes other than this cancer dx)	55	Dead
1159189	Married (including common law)	Black	57	Male	2010	Rectum	Moderately differentiated; Grade II	Positive histology	8210/3: Adenocarcinoma in adenomatous polyp	Distant	T3	N2	M1	10	3	84	13	13	One primary only	30	No radiation and/or cancer-directed surgery	None/Unknown	Yes	Systemic therapy after surgery	Dead (attributable to this cancer dx)	Alive or dead due to cancer	46	Dead
1159207	Widowed	White	77	Female	2010	Rectum	Moderately differentiated; Grade II	Positive histology	8140/3: Adenocarcinoma, NOS	Regional	T3	N0	M0	10	0	25	0	98	One primary only	20	Radiation prior to surgery	Beam radiation	Yes	Systemic therapy before surgery	Alive or dead of other cause	Alive or dead due to cancer	105	Alive
1159227	Married (including common law)	Other (American Indian/AK Native, Asian/Pacific Islander)	78	Male	2010	Sigmoid Colon	Moderately differentiated; Grade II	Positive histology	8210/3: Adenocarcinoma in adenomatous polyp	Localized	T1	N0	M0	20	998	4	0	98	One primary only	26	No radiation and/or cancer-directed surgery	None/Unknown	No/Unknown	No systemic therapy and/or surgical procedures	Alive or dead of other cause	Dead (attributable to causes other than this cancer dx)	43	Dead
1159231	Single (never married)	White	77	Male	2010	Rectum	Poorly differentiated; Grade III	Positive histology	8210/3: Adenocarcinoma in adenomatous polyp	Distant	T2	N0	M1	20	0	20	0	98	One primary only	26	Radiation after surgery	Beam radiation	Yes	Systemic therapy after surgery	Dead (attributable to this cancer dx)	Alive or dead due to cancer	3	Dead
1159259	Married (including common law)	White	81	Male	2010	Ascending Colon	Well differentiated; Grade I	Positive histology	8140/3: Adenocarcinoma, NOS	Localized	T3	N0	M0	998	0	30	16	0	One primary only	30	No radiation and/or cancer-directed surgery	None/Unknown	No/Unknown	No systemic therapy and/or surgical procedures	Alive or dead of other cause	Dead (attributable to causes other than this cancer dx)	100	Dead
1159263	Married (including common law)	White	54	Female	2010	Sigmoid Colon	Moderately differentiated; Grade II	Positive histology	8140/3: Adenocarcinoma, NOS	Regional	T3	N1	M0	997	0	22	7	3	One primary only	30	No radiation and/or cancer-directed surgery	None/Unknown	Yes	Systemic therapy after surgery	Dead (attributable to this cancer dx)	Alive or dead due to cancer	39	Dead
1159286	Widowed	Other (American Indian/AK Native, Asian/Pacific Islander)	80	Female	2010	Rectosigmoid Junction	Moderately differentiated; Grade II	Positive histology	8140/3: Adenocarcinoma, NOS	Regional	T4	N2	M0	999	0	65	12	1	One primary only	90	No radiation and/or cancer-directed surgery	None/Unknown	No/Unknown	No systemic therapy and/or surgical procedures	Alive or dead of other cause	Alive or dead due to cancer	102	Alive
1159310	Married (including common law)	Other (American Indian/AK Native, Asian/Pacific Islander)	72	Male	2010	Descending Colon	Moderately differentiated; Grade II	Positive histology	8140/3: Adenocarcinoma, NOS	Regional	T2	N1	M0	20	0	30	18	3	One primary only	40	No radiation and/or cancer-directed surgery	None/Unknown	Yes	Systemic therapy after surgery	Alive or dead of other cause	Alive or dead due to cancer	95	Alive
1159316	Married (including common law)	White	50	Male	2010	Sigmoid Colon	Moderately differentiated; Grade II	Positive histology	8140/3: Adenocarcinoma, NOS	Distant	T3	N0	M1	20	0	999	16	0	One primary only	30	No radiation and/or cancer-directed surgery	None/Unknown	Yes	Systemic therapy after surgery	Dead (attributable to this cancer dx)	Alive or dead due to cancer	100	Dead
1159350	Married (including common law)	White	74	Male	2010	Cecum	Moderately differentiated; Grade II	Positive histology	8263/3: Adenocarcinoma in tubulovillous adenoma	Localized	T2	N0	M0	20	0	28	15	0	One primary only	40	No radiation and/or cancer-directed surgery	None/Unknown	No/Unknown	No systemic therapy and/or surgical procedures	Alive or dead of other cause	Alive or dead due to cancer	105	Alive
1159380	Widowed	White	85	Female	2010	Cecum	Poorly differentiated; Grade III	Positive histology	8140/3: Adenocarcinoma, NOS	Regional	T3	N0	M0	998	0	35	34	0	One primary only	40	No radiation and/or cancer-directed surgery	None/Unknown	No/Unknown	No systemic therapy and/or surgical procedures	Dead (attributable to this cancer dx)	Alive or dead due to cancer	0	Dead
1159396	Married (including common law)	Black	70	Female	2010	Ascending Colon	Moderately differentiated; Grade II	Positive histology	8140/3: Adenocarcinoma, NOS	Regional	T3	N1	M0	20	0	42	19	3	One primary only	40	No radiation and/or cancer-directed surgery	None/Unknown	Yes	Systemic therapy after surgery	Alive or dead of other cause	Dead (attributable to causes other than this cancer dx)	60	Dead
1159400	Married (including common law)	Black	62	Male	2010	Rectum	Undifferentiated; anaplastic; Grade IV	Positive histology	8140/3: Adenocarcinoma, NOS	Localized	T2	N0	M0	20	0	28	14	0	One primary only	30	No radiation and/or cancer-directed surgery	None/Unknown	No/Unknown	No systemic therapy and/or surgical procedures	Alive or dead of other cause	Dead (attributable to causes other than this cancer dx)	20	Dead
1159563	Married (including common law)	White	85	Female	2012	Transverse Colon	Moderately differentiated; Grade II	Positive histology	8140/3: Adenocarcinoma, NOS	Localized	T3	N0	M0	20	0	48	45	0	One primary only	40	No radiation and/or cancer-directed surgery	None/Unknown	No/Unknown	No systemic therapy and/or surgical procedures	Alive or dead of other cause	Dead (attributable to causes other than this cancer dx)	70	Dead
1159638	Married (including common law)	White	52	Female	2010	Rectum	Moderately differentiated; Grade II	Positive histology	8140/3: Adenocarcinoma, NOS	Regional	T3	N1	M0	20	0	36	9	0	One primary only	30	Radiation prior to surgery	Beam radiation	Yes	Systemic therapy both before and after surgery	Alive or dead of other cause	Alive or dead due to cancer	105	Alive
1159650	Married (including common law)	White	32	Male	2010	Splenic Flexure	Moderately differentiated; Grade II	Positive histology	8140/3: Adenocarcinoma, NOS	Localized	T2	N0	M0	20	0	55	16	0	One primary only	40	No radiation and/or cancer-directed surgery	None/Unknown	No/Unknown	No systemic therapy and/or surgical procedures	Alive or dead of other cause	Alive or dead due to cancer	103	Alive
1159663	Married (including common law)	White	66	Male	2010	Cecum	Moderately differentiated; Grade II	Positive histology	8480/3: Mucinous adenocarcinoma	Distant	T4	N0	M1	10	0	80	16	0	One primary only	40	No radiation and/or cancer-directed surgery	None/Unknown	Yes	Systemic therapy after surgery	Alive or dead of other cause	Alive or dead due to cancer	102	Alive
1159676	Single (never married)	Other (American Indian/AK Native, Asian/Pacific Islander)	35	Female	2010	Rectosigmoid Junction	Moderately differentiated; Grade II	Positive histology	8140/3: Adenocarcinoma, NOS	Regional	T1	N2	M0	10	0	40	18	4	One primary only	30	Radiation prior to surgery	Beam radiation	Yes	Systemic therapy before surgery	Alive or dead of other cause	Alive or dead due to cancer	103	Alive
1159699	Married (including common law)	Other (American Indian/AK Native, Asian/Pacific Islander)	65	Male	2010	Sigmoid Colon	Poorly differentiated; Grade III	Positive histology	8490/3: Signet ring cell carcinoma	Distant	T4	N2	M1	10	0	60	16	14	One primary only	30	No radiation and/or cancer-directed surgery	None/Unknown	No/Unknown	No systemic therapy and/or surgical procedures	Dead (attributable to this cancer dx)	Alive or dead due to cancer	1	Dead
1159785	Married (including common law)	White	66	Male	2010	Cecum	Moderately differentiated; Grade II	Positive histology	8140/3: Adenocarcinoma, NOS	Regional	T4	N2	M0	10	0	40	13	6	One primary only	30	No radiation and/or cancer-directed surgery	None/Unknown	Yes	Systemic therapy after surgery	Dead (attributable to this cancer dx)	Alive or dead due to cancer	30	Dead
1159807	Married (including common law)	White	74	Male	2010	Transverse Colon	Moderately differentiated; Grade II	Positive histology	8140/3: Adenocarcinoma, NOS	Regional	T1	N1	M0	999	998	999	0	98	One primary only	0	No radiation and/or cancer-directed surgery	None/Unknown	Yes	No systemic therapy and/or surgical procedures	Dead (attributable to this cancer dx)	Alive or dead due to cancer	21	Dead
1159928	Married (including common law)	White	65	Female	2010	Rectosigmoid Junction	Moderately differentiated; Grade II	Positive histology	8140/3: Adenocarcinoma, NOS	Regional	T3	N0	M0	10	990	20	16	0	One primary only	30	Radiation prior to surgery	Beam radiation	Yes	Systemic therapy before surgery	Dead (attributable to this cancer dx)	Alive or dead due to cancer	42	Dead
1159953	Married (including common law)	Black	65	Male	2010	Hepatic Flexure	Moderately differentiated; Grade II	Positive histology	8144/3: Adenocarcinoma, intestinal type	Regional	T4	N1	M0	10	0	65	28	2	One primary only	40	No radiation and/or cancer-directed surgery	None/Unknown	Yes	Systemic therapy after surgery	Alive or dead of other cause	Alive or dead due to cancer	105	Alive
1159956	Married (including common law)	White	80	Female	2010	Cecum	Undifferentiated; anaplastic; Grade IV	Positive histology	8140/3: Adenocarcinoma, NOS	Regional	T4	N1	M0	10	0	50	97	97	One primary only	40	No radiation and/or cancer-directed surgery	None/Unknown	No/Unknown	No systemic therapy and/or surgical procedures	Dead (attributable to this cancer dx)	Alive or dead due to cancer	2	Dead
1159978	Single (never married)	White	85	Male	2010	Descending Colon	Moderately differentiated; Grade II	Positive histology	8140/3: Adenocarcinoma, NOS	Regional	T3	N1	M0	20	0	45	9	2	One primary only	30	No radiation and/or cancer-directed surgery	None/Unknown	No/Unknown	No systemic therapy and/or surgical procedures	Alive or dead of other cause	Dead (attributable to causes other than this cancer dx)	28	Dead
1159990	Single (never married)	White	62	Male	2010	Rectosigmoid Junction	Moderately differentiated; Grade II	Positive histology	8140/3: Adenocarcinoma, NOS	Regional	T4	N1	M0	999	0	110	18	1	One primary only	30	No radiation and/or cancer-directed surgery	None/Unknown	No/Unknown	No systemic therapy and/or surgical procedures	Dead (attributable to this cancer dx)	Alive or dead due to cancer	65	Dead
1160000	Single (never married)	Black	79	Female	2010	Descending Colon	Poorly differentiated; Grade III	Positive histology	8481/3: Mucin-producing adenocarcinoma	Regional	T4	N1	M0	10	998	100	0	98	One primary only	0	No radiation and/or cancer-directed surgery	None/Unknown	Yes	No systemic therapy and/or surgical procedures	Dead (attributable to this cancer dx)	Alive or dead due to cancer	0	Dead
1160080	Married (including common law)	White	69	Female	2010	Sigmoid Colon	Moderately differentiated; Grade II	Positive histology	8140/3: Adenocarcinoma, NOS	Distant	T4	N2	M1	10	990	42	14	11	One primary only	30	No radiation and/or cancer-directed surgery	None/Unknown	Yes	Systemic therapy after surgery	Dead (attributable to this cancer dx)	Alive or dead due to cancer	28	Dead
1160133	Married (including common law)	White	65	Female	2010	Transverse Colon	Poorly differentiated; Grade III	Positive histology	8140/3: Adenocarcinoma, NOS	Regional	T3	N0	M0	10	0	50	17	0	One primary only	40	No radiation and/or cancer-directed surgery	None/Unknown	Yes	Systemic therapy after surgery	Alive or dead of other cause	Alive or dead due to cancer	101	Alive
1160161	Single (never married)	Black	72	Male	2010	Cecum	Moderately differentiated; Grade II	Positive histology	8210/3: Adenocarcinoma in adenomatous polyp	Localized	T1	N0	M0	998	0	999	18	0	One primary only	40	No radiation and/or cancer-directed surgery	None/Unknown	No/Unknown	No systemic therapy and/or surgical procedures	Alive or dead of other cause	Dead (attributable to causes other than this cancer dx)	21	Dead
1160197	Divorced	Black	72	Female	2010	Cecum	Moderately differentiated; Grade II	Positive histology	8263/3: Adenocarcinoma in tubulovillous adenoma	Localized	T1	N0	M0	20	0	999	19	0	One primary only	40	No radiation and/or cancer-directed surgery	None/Unknown	No/Unknown	No systemic therapy and/or surgical procedures	Alive or dead of other cause	Alive or dead due to cancer	104	Alive
1160200	Single (never married)	Black	56	Male	2010	Rectum	Poorly differentiated; Grade III	Positive histology	8140/3: Adenocarcinoma, NOS	Regional	T3	N2	M0	999	0	30	20	5	One primary only	30	Radiation prior to surgery	Beam radiation	Yes	Systemic therapy before surgery	Alive or dead of other cause	Dead (attributable to causes other than this cancer dx)	52	Dead
1160257	Married (including common law)	Other (American Indian/AK Native, Asian/Pacific Islander)	68	Male	2010	Sigmoid Colon	Moderately differentiated; Grade II	Positive histology	8140/3: Adenocarcinoma, NOS	Regional	T3	N1	M0	10	0	40	9	2	One primary only	30	Radiation after surgery	Beam radiation	Yes	Systemic therapy after surgery	Alive or dead of other cause	Alive or dead due to cancer	105	Alive
1160277	Married (including common law)	Other (American Indian/AK Native, Asian/Pacific Islander)	85	Female	2010	Rectosigmoid Junction	Moderately differentiated; Grade II	Positive histology	8140/3: Adenocarcinoma, NOS	Distant	T4	N0	M0	20	998	999	0	98	One primary only	0	No radiation and/or cancer-directed surgery	None/Unknown	No/Unknown	No systemic therapy and/or surgical procedures	Dead (attributable to this cancer dx)	Alive or dead due to cancer	6	Dead
1160285	Divorced	White	82	Male	2010	Ascending Colon	Poorly differentiated; Grade III	Positive histology	8140/3: Adenocarcinoma, NOS	Regional	T3	N0	M0	998	0	30	11	0	One primary only	40	No radiation and/or cancer-directed surgery	None/Unknown	No/Unknown	No systemic therapy and/or surgical procedures	Alive or dead of other cause	Dead (attributable to causes other than this cancer dx)	0	Dead
1160291	Married (including common law)	White	79	Female	2010	Rectosigmoid Junction	Moderately differentiated; Grade II	Positive histology	8140/3: Adenocarcinoma, NOS	Regional	T3	N1	M0	20	0	45	16	1	One primary only	30	No radiation and/or cancer-directed surgery	None/Unknown	Yes	Systemic therapy after surgery	Alive or dead of other cause	Alive or dead due to cancer	105	Alive
1160300	Married (including common law)	White	78	Male	2010	Sigmoid Colon	Moderately differentiated; Grade II	Positive histology	8140/3: Adenocarcinoma, NOS	Distant	T4	N1	M0	998	0	60	14	2	One primary only	30	Radiation after surgery	Beam radiation	Yes	Systemic therapy after surgery	Dead (attributable to this cancer dx)	Alive or dead due to cancer	47	Dead
1160303	Widowed	White	73	Male	2010	Rectum	Moderately differentiated; Grade II	Positive histology	8140/3: Adenocarcinoma, NOS	Regional	T3	N1	M0	10	0	999	2	0	One primary only	50	Radiation prior to surgery	Beam radiation	Yes	Systemic therapy before surgery	Alive or dead of other cause	Alive or dead due to cancer	104	Alive
1160334	Widowed	White	75	Female	2010	Splenic Flexure	Moderately differentiated; Grade II	Positive histology	8140/3: Adenocarcinoma, NOS	Distant	T4	N2	M1	998	998	999	0	98	One primary only	0	No radiation and/or cancer-directed surgery	None/Unknown	Yes	No systemic therapy and/or surgical procedures	Dead (attributable to this cancer dx)	Alive or dead due to cancer	10	Dead
1160414	Widowed	Other (American Indian/AK Native, Asian/Pacific Islander)	85	Female	2010	Transverse Colon	Moderately differentiated; Grade II	Positive histology	8140/3: Adenocarcinoma, NOS	Localized	T2	N0	M0	20	0	45	14	0	One primary only	40	No radiation and/or cancer-directed surgery	None/Unknown	No/Unknown	No systemic therapy and/or surgical procedures	Alive or dead of other cause	Alive or dead due to cancer	106	Alive
1160415	Married (including common law)	Black	64	Male	2010	Cecum	Moderately differentiated; Grade II	Positive histology	8140/3: Adenocarcinoma, NOS	Localized	T2	N0	M0	20	0	36	30	0	One primary only	30	No radiation and/or cancer-directed surgery	None/Unknown	No/Unknown	No systemic therapy and/or surgical procedures	Alive or dead of other cause	Alive or dead due to cancer	103	Alive
1160491	Widowed	White	85	Female	2010	Rectosigmoid Junction	Moderately differentiated; Grade II	Positive histology	8480/3: Mucinous adenocarcinoma	Regional	T2	N1	M0	20	0	70	14	2	One primary only	50	No radiation and/or cancer-directed surgery	None/Unknown	No/Unknown	No systemic therapy and/or surgical procedures	Alive or dead of other cause	Dead (attributable to causes other than this cancer dx)	47	Dead
1160513	Widowed	White	76	Male	2010	Sigmoid Colon	Moderately differentiated; Grade II	Positive histology	8140/3: Adenocarcinoma, NOS	Localized	T1	N0	M0	999	0	7	5	0	One primary only	30	No radiation and/or cancer-directed surgery	None/Unknown	No/Unknown	No systemic therapy and/or surgical procedures	Alive or dead of other cause	Dead (attributable to causes other than this cancer dx)	62	Dead
1160534	Married (including common law)	White	61	Female	2010	Sigmoid Colon	Moderately differentiated; Grade II	Positive histology	8140/3: Adenocarcinoma, NOS	Distant	T4	N1	M1	10	990	15	9	3	One primary only	30	No radiation and/or cancer-directed surgery	None/Unknown	Yes	Systemic therapy after surgery	Dead (attributable to this cancer dx)	Alive or dead due to cancer	33	Dead
1160658	Single (never married)	Other (American Indian/AK Native, Asian/Pacific Islander)	76	Female	2010	Rectosigmoid Junction	Well differentiated; Grade I	Positive histology	8140/3: Adenocarcinoma, NOS	Distant	T3	N1	M1	10	1	42	12	1	One primary only	30	No radiation and/or cancer-directed surgery	None/Unknown	Yes	Systemic therapy after surgery	Dead (attributable to this cancer dx)	Alive or dead due to cancer	10	Dead
1160711	Single (never married)	Black	48	Male	2010	Rectosigmoid Junction	Moderately differentiated; Grade II	Positive histology	8140/3: Adenocarcinoma, NOS	Distant	T4	N1	M1	10	0	45	21	3	One primary only	70	No radiation and/or cancer-directed surgery	None/Unknown	Yes	Systemic therapy after surgery	Dead (attributable to this cancer dx)	Alive or dead due to cancer	21	Dead
1160748	Married (including common law)	White	79	Female	2010	Ascending Colon	Moderately differentiated; Grade II	Positive histology	8140/3: Adenocarcinoma, NOS	Localized	T1	N0	M0	20	0	30	12	0	One primary only	30	No radiation and/or cancer-directed surgery	None/Unknown	No/Unknown	No systemic therapy and/or surgical procedures	Alive or dead of other cause	Alive or dead due to cancer	104	Alive
1160843	Divorced	White	85	Female	2010	Rectosigmoid Junction	Moderately differentiated; Grade II	Positive histology	8210/3: Adenocarcinoma in adenomatous polyp	Regional	T1	N1	M0	999	0	15	12	1	One primary only	30	No radiation and/or cancer-directed surgery	None/Unknown	No/Unknown	No systemic therapy and/or surgical procedures	Alive or dead of other cause	Dead (attributable to causes other than this cancer dx)	60	Dead
1160845	Widowed	White	85	Male	2010	Sigmoid Colon	Moderately differentiated; Grade II	Positive histology	8140/3: Adenocarcinoma, NOS	Regional	T3	N1	M0	999	0	45	22	3	One primary only	30	No radiation and/or cancer-directed surgery	None/Unknown	No/Unknown	No systemic therapy and/or surgical procedures	Alive or dead of other cause	Dead (attributable to causes other than this cancer dx)	72	Dead
1160916	Married (including common law)	White	58	Male	2010	Sigmoid Colon	Moderately differentiated; Grade II	Positive histology	8140/3: Adenocarcinoma, NOS	Regional	T3	N1	M0	999	0	55	25	1	One primary only	30	No radiation and/or cancer-directed surgery	None/Unknown	No/Unknown	No systemic therapy and/or surgical procedures	Alive or dead of other cause	Alive or dead due to cancer	104	Alive
1160989	Married (including common law)	Other (American Indian/AK Native, Asian/Pacific Islander)	75	Male	2010	Transverse Colon	Moderately differentiated; Grade II	Positive histology	8210/3: Adenocarcinoma in adenomatous polyp	Localized	T2	N0	M0	10	0	12	10	0	One primary only	30	No radiation and/or cancer-directed surgery	None/Unknown	No/Unknown	No systemic therapy and/or surgical procedures	Alive or dead of other cause	Alive or dead due to cancer	41	Alive
1160992	Single (never married)	White	49	Male	2010	Sigmoid Colon	Moderately differentiated; Grade II	Positive histology	8210/3: Adenocarcinoma in adenomatous polyp	Localized	T1	N0	M0	998	0	18	4	0	One primary only	30	No radiation and/or cancer-directed surgery	None/Unknown	No/Unknown	No systemic therapy and/or surgical procedures	Alive or dead of other cause	Alive or dead due to cancer	98	Alive
1161072	Divorced	Other (American Indian/AK Native, Asian/Pacific Islander)	50	Female	2010	Rectum	Moderately differentiated; Grade II	Positive histology	8140/3: Adenocarcinoma, NOS	Regional	T3	N2	M0	10	990	40	18	5	One primary only	30	Radiation before and after surgery	Beam radiation	Yes	Systemic therapy after surgery	Dead (attributable to this cancer dx)	Alive or dead due to cancer	73	Dead
1161095	Married (including common law)	Other (American Indian/AK Native, Asian/Pacific Islander)	58	Male	2010	Transverse Colon	Moderately differentiated; Grade II	Positive histology	8140/3: Adenocarcinoma, NOS	Regional	T3	N1	M0	20	2	40	27	1	One primary only	40	No radiation and/or cancer-directed surgery	None/Unknown	Yes	Systemic therapy after surgery	Alive or dead of other cause	Alive or dead due to cancer	100	Alive
1161146	Married (including common law)	White	33	Male	2010	Sigmoid Colon	Moderately differentiated; Grade II	Positive histology	8140/3: Adenocarcinoma, NOS	Distant	T3	N2	M1	998	990	42	20	7	One primary only	30	No radiation and/or cancer-directed surgery	None/Unknown	Yes	Systemic therapy after surgery	Dead (attributable to this cancer dx)	Alive or dead due to cancer	27	Dead
1161200	Married (including common law)	White	53	Male	2010	Rectum	Moderately differentiated; Grade II	Positive histology	8263/3: Adenocarcinoma in tubulovillous adenoma	Localized	T1	N0	M0	998	0	10	27	0	One primary only	30	No radiation and/or cancer-directed surgery	None/Unknown	No/Unknown	No systemic therapy and/or surgical procedures	Alive or dead of other cause	Alive or dead due to cancer	102	Alive
1161206	Married (including common law)	White	62	Female	2010	Ascending Colon	Moderately differentiated; Grade II	Positive histology	8210/3: Adenocarcinoma in adenomatous polyp	Regional	T3	N1	M0	20	0	20	27	1	One primary only	40	No radiation and/or cancer-directed surgery	None/Unknown	Yes	Systemic therapy after surgery	Alive or dead of other cause	Alive or dead due to cancer	99	Alive
1161213	Single (never married)	White	39	Female	2010	Ascending Colon	Moderately differentiated; Grade II	Positive histology	8140/3: Adenocarcinoma, NOS	Localized	T2	N0	M0	20	0	60	13	0	One primary only	40	No radiation and/or cancer-directed surgery	None/Unknown	No/Unknown	No systemic therapy and/or surgical procedures	Alive or dead of other cause	Alive or dead due to cancer	102	Alive
1161280	Married (including common law)	White	63	Female	2010	Cecum	Moderately differentiated; Grade II	Positive histology	8140/3: Adenocarcinoma, NOS	Regional	T4	N0	M0	20	0	35	21	0	One primary only	40	No radiation and/or cancer-directed surgery	None/Unknown	Yes	Systemic therapy after surgery	Dead (attributable to this cancer dx)	Alive or dead due to cancer	31	Dead
1161291	Married (including common law)	White	74	Male	2010	Sigmoid Colon	Moderately differentiated; Grade II	Positive histology	8263/3: Adenocarcinoma in tubulovillous adenoma	Localized	T1	N0	M0	20	0	32	7	0	One primary only	30	No radiation and/or cancer-directed surgery	None/Unknown	No/Unknown	No systemic therapy and/or surgical procedures	Alive or dead of other cause	Dead (attributable to causes other than this cancer dx)	77	Dead
1161319	Married (including common law)	Black	75	Female	2010	Rectum	Moderately differentiated; Grade II	Positive histology	8140/3: Adenocarcinoma, NOS	Regional	T3	N1	M0	10	1	989	0	98	One primary only	30	Radiation prior to surgery	Beam radiation	Yes	Systemic therapy before surgery	Alive or dead of other cause	Alive or dead due to cancer	105	Alive
1161339	Single (never married)	Black	46	Male	2010	Rectum	Moderately differentiated; Grade II	Positive histology	8140/3: Adenocarcinoma, NOS	Regional	T4	N2	M0	20	999	50	13	0	One primary only	30	Radiation prior to surgery	Beam radiation	Yes	Systemic therapy both before and after surgery	Alive or dead of other cause	Alive or dead due to cancer	103	Alive
1161384	Married (including common law)	White	76	Female	2010	Hepatic Flexure	Poorly differentiated; Grade III	Positive histology	8210/3: Adenocarcinoma in adenomatous polyp	Regional	T3	N1	M0	10	0	30	29	1	One primary only	32	No radiation and/or cancer-directed surgery	None/Unknown	Yes	Systemic therapy after surgery	Alive or dead of other cause	Alive or dead due to cancer	102	Alive
1161417	Divorced	White	59	Female	2010	Rectosigmoid Junction	Moderately differentiated; Grade II	Positive histology	8140/3: Adenocarcinoma, NOS	Regional	T4	N2	M0	20	0	40	47	8	One primary only	30	No radiation and/or cancer-directed surgery	None/Unknown	No/Unknown	No systemic therapy and/or surgical procedures	Dead (attributable to this cancer dx)	Alive or dead due to cancer	3	Dead
1161456	Married (including common law)	Other (American Indian/AK Native, Asian/Pacific Islander)	61	Male	2010	Sigmoid Colon	Poorly differentiated; Grade III	Positive histology	8140/3: Adenocarcinoma, NOS	Distant	T3	N2	M1	998	1	40	25	6	One primary only	30	No radiation and/or cancer-directed surgery	None/Unknown	Yes	Systemic therapy after surgery	Dead (attributable to this cancer dx)	Alive or dead due to cancer	36	Dead
1161465	Single (never married)	White	85	Female	2010	Ascending Colon	Moderately differentiated; Grade II	Positive histology	8263/3: Adenocarcinoma in tubulovillous adenoma	Localized	T1	N0	M0	20	0	41	20	0	One primary only	40	No radiation and/or cancer-directed surgery	None/Unknown	No/Unknown	No systemic therapy and/or surgical procedures	Alive or dead of other cause	Alive or dead due to cancer	106	Alive
1161476	Married (including common law)	Black	70	Male	2010	Rectum	Moderately differentiated; Grade II	Positive histology	8263/3: Adenocarcinoma in tubulovillous adenoma	Localized	T1	N0	M0	998	0	999	0	98	One primary only	27	No radiation and/or cancer-directed surgery	None/Unknown	No/Unknown	No systemic therapy and/or surgical procedures	Alive or dead of other cause	Dead (attributable to causes other than this cancer dx)	54	Dead
1161490	Married (including common law)	White	71	Male	2010	Cecum	Poorly differentiated; Grade III	Positive histology	8140/3: Adenocarcinoma, NOS	Distant	T1	N1	M1	10	998	58	0	98	One primary only	0	No radiation and/or cancer-directed surgery	None/Unknown	Yes	No systemic therapy and/or surgical procedures	Dead (attributable to this cancer dx)	Alive or dead due to cancer	7	Dead
1161615	Married (including common law)	White	63	Male	2010	Hepatic Flexure	Moderately differentiated; Grade II	Positive histology	8140/3: Adenocarcinoma, NOS	Regional	T3	N0	M0	20	0	75	37	0	One primary only	40	No radiation and/or cancer-directed surgery	None/Unknown	No/Unknown	No systemic therapy and/or surgical procedures	Alive or dead of other cause	Alive or dead due to cancer	100	Alive
1161642	Single (never married)	Other (American Indian/AK Native, Asian/Pacific Islander)	60	Female	2010	Cecum	Moderately differentiated; Grade II	Positive histology	8140/3: Adenocarcinoma, NOS	Regional	T3	N1	M0	20	0	21	10	1	One primary only	40	No radiation and/or cancer-directed surgery	None/Unknown	Yes	Systemic therapy after surgery	Dead (attributable to this cancer dx)	Alive or dead due to cancer	39	Dead
1161671	Widowed	White	85	Female	2010	Cecum	Poorly differentiated; Grade III	Positive histology	8140/3: Adenocarcinoma, NOS	Regional	T3	N0	M0	20	0	45	22	0	One primary only	40	No radiation and/or cancer-directed surgery	None/Unknown	No/Unknown	No systemic therapy and/or surgical procedures	Alive or dead of other cause	Dead (attributable to causes other than this cancer dx)	96	Dead
1161692	Married (including common law)	White	74	Female	2010	Sigmoid Colon	Moderately differentiated; Grade II	Positive histology	8140/3: Adenocarcinoma, NOS	Localized	T1	N0	M0	20	0	5	14	0	One primary only	30	No radiation and/or cancer-directed surgery	None/Unknown	No/Unknown	No systemic therapy and/or surgical procedures	Alive or dead of other cause	Alive or dead due to cancer	107	Alive
1161700	Married (including common law)	White	51	Male	2010	Rectum	Moderately differentiated; Grade II	Positive histology	8140/3: Adenocarcinoma, NOS	Localized	T3	N0	M0	20	0	50	17	0	One primary only	30	Radiation prior to surgery	Beam radiation	Yes	Systemic therapy both before and after surgery	Alive or dead of other cause	Alive or dead due to cancer	107	Alive
1161716	Married (including common law)	White	46	Male	2010	Transverse Colon	Poorly differentiated; Grade III	Positive histology	8140/3: Adenocarcinoma, NOS	Localized	T3	N0	M0	20	0	25	17	0	One primary only	40	No radiation and/or cancer-directed surgery	None/Unknown	No/Unknown	No systemic therapy and/or surgical procedures	Dead (attributable to this cancer dx)	Alive or dead due to cancer	99	Dead
1161737	Married (including common law)	White	45	Male	2010	Splenic Flexure	Moderately differentiated; Grade II	Positive histology	8140/3: Adenocarcinoma, NOS	Regional	T3	N2	M0	20	0	30	26	8	One primary only	30	No radiation and/or cancer-directed surgery	None/Unknown	Yes	Systemic therapy after surgery	Alive or dead of other cause	Alive or dead due to cancer	107	Alive
1161770	Widowed	White	81	Female	2010	Rectum	Poorly differentiated; Grade III	Positive histology	8140/3: Adenocarcinoma, NOS	Localized	T1	N0	M0	20	0	10	13	0	One primary only	30	No radiation and/or cancer-directed surgery	None/Unknown	No/Unknown	No systemic therapy and/or surgical procedures	Alive or dead of other cause	Alive or dead due to cancer	106	Alive
1161814	Divorced	White	33	Male	2010	Rectum	Moderately differentiated; Grade II	Positive histology	8480/3: Mucinous adenocarcinoma	Regional	T3	N1	M0	10	0	50	7	1	One primary only	40	Radiation prior to surgery	Beam radiation	Yes	Systemic therapy both before and after surgery	Alive or dead of other cause	Alive or dead due to cancer	106	Alive
1161842	Widowed	White	66	Female	2010	Rectum	Moderately differentiated; Grade II	Positive histology	8140/3: Adenocarcinoma, NOS	Regional	T2	N1	M0	20	0	990	11	0	One primary only	30	Radiation prior to surgery	Beam radiation	Yes	Systemic therapy before surgery	Alive or dead of other cause	Alive or dead due to cancer	105	Alive
1161864	Married (including common law)	White	70	Female	2010	Ascending Colon	Moderately differentiated; Grade II	Positive histology	8490/3: Signet ring cell carcinoma	Localized	T3	N0	M0	20	0	999	12	0	One primary only	30	No radiation and/or cancer-directed surgery	None/Unknown	No/Unknown	No systemic therapy and/or surgical procedures	Alive or dead of other cause	Alive or dead due to cancer	106	Alive
1161963	Married (including common law)	White	28	Male	2010	Cecum	Moderately differentiated; Grade II	Positive histology	8263/3: Adenocarcinoma in tubulovillous adenoma	Regional	T2	N1	M0	20	0	999	90	1	One primary only	60	No radiation and/or cancer-directed surgery	None/Unknown	Yes	Systemic therapy after surgery	Alive or dead of other cause	Alive or dead due to cancer	105	Alive
1162007	Married (including common law)	White	61	Male	2010	Sigmoid Colon	Moderately differentiated; Grade II	Positive histology	8263/3: Adenocarcinoma in tubulovillous adenoma	Localized	T1	N0	M0	998	998	10	0	98	One primary only	29	No radiation and/or cancer-directed surgery	None/Unknown	No/Unknown	No systemic therapy and/or surgical procedures	Alive or dead of other cause	Alive or dead due to cancer	104	Alive
1162017	Married (including common law)	White	85	Male	2010	Ascending Colon	Moderately differentiated; Grade II	Positive histology	8140/3: Adenocarcinoma, NOS	Regional	T4	N2	M0	10	0	999	14	7	One primary only	30	No radiation and/or cancer-directed surgery	None/Unknown	No/Unknown	No systemic therapy and/or surgical procedures	Dead (attributable to this cancer dx)	Alive or dead due to cancer	0	Dead
1162052	Single (never married)	Other (American Indian/AK Native, Asian/Pacific Islander)	65	Female	2010	Ascending Colon	Poorly differentiated; Grade III	Positive histology	8140/3: Adenocarcinoma, NOS	Regional	T3	N2	M0	20	0	10	18	7	One primary only	30	No radiation and/or cancer-directed surgery	None/Unknown	Yes	Systemic therapy after surgery	Alive or dead of other cause	Alive or dead due to cancer	103	Alive
1162073	Married (including common law)	White	62	Male	2010	Rectosigmoid Junction	Well differentiated; Grade I	Positive histology	8263/3: Adenocarcinoma in tubulovillous adenoma	Regional	T1	N1	M0	20	0	999	12	2	One primary only	30	Radiation after surgery	Beam radiation	Yes	Systemic therapy after surgery	Alive or dead of other cause	Alive or dead due to cancer	103	Alive
1162135	Widowed	White	85	Female	2010	Cecum	Poorly differentiated; Grade III	Positive histology	8140/3: Adenocarcinoma, NOS	Regional	T3	N1	M0	10	0	58	23	1	One primary only	30	No radiation and/or cancer-directed surgery	None/Unknown	No/Unknown	No systemic therapy and/or surgical procedures	Dead (attributable to this cancer dx)	Alive or dead due to cancer	9	Dead
1162139	Married (including common law)	White	60	Female	2010	Sigmoid Colon	Moderately differentiated; Grade II	Positive histology	8140/3: Adenocarcinoma, NOS	Regional	T3	N2	M0	20	0	47	15	6	One primary only	30	No radiation and/or cancer-directed surgery	None/Unknown	Yes	Systemic therapy after surgery	Alive or dead of other cause	Alive or dead due to cancer	101	Alive
1162141	Married (including common law)	White	66	Female	2010	Splenic Flexure	Moderately differentiated; Grade II	Positive histology	8263/3: Adenocarcinoma in tubulovillous adenoma	Localized	T3	N0	M0	20	0	45	6	0	One primary only	30	No radiation and/or cancer-directed surgery	None/Unknown	No/Unknown	No systemic therapy and/or surgical procedures	Alive or dead of other cause	Alive or dead due to cancer	101	Alive
1162222	Widowed	White	85	Female	2010	Ascending Colon	Moderately differentiated; Grade II	Positive histology	8140/3: Adenocarcinoma, NOS	Regional	T3	N2	M0	10	0	35	97	4	One primary only	30	No radiation and/or cancer-directed surgery	None/Unknown	No/Unknown	No systemic therapy and/or surgical procedures	Dead (attributable to this cancer dx)	Alive or dead due to cancer	6	Dead
1162385	Single (never married)	White	45	Male	2010	Ascending Colon	Moderately differentiated; Grade II	Positive histology	8480/3: Mucinous adenocarcinoma	Localized	T3	N0	M0	998	0	70	39	0	One primary only	40	No radiation and/or cancer-directed surgery	None/Unknown	No/Unknown	No systemic therapy and/or surgical procedures	Alive or dead of other cause	Alive or dead due to cancer	98	Alive
1162389	Married (including common law)	White	65	Male	2010	Rectum	Poorly differentiated; Grade III	Positive histology	8140/3: Adenocarcinoma, NOS	Regional	T3	N1	M0	20	0	35	0	98	One primary only	50	Radiation prior to surgery	Beam radiation	Yes	Systemic therapy before surgery	Alive or dead of other cause	Alive or dead due to cancer	99	Alive
1162410	Divorced	White	80	Male	2010	Sigmoid Colon	Moderately differentiated; Grade II	Positive histology	8140/3: Adenocarcinoma, NOS	Regional	T2	N1	M0	10	0	45	22	1	One primary only	80	No radiation and/or cancer-directed surgery	None/Unknown	No/Unknown	No systemic therapy and/or surgical procedures	Alive or dead of other cause	Dead (attributable to causes other than this cancer dx)	54	Dead
1162419	Widowed	Other (American Indian/AK Native, Asian/Pacific Islander)	75	Female	2010	Cecum	Moderately differentiated; Grade II	Positive histology	8140/3: Adenocarcinoma, NOS	Regional	T2	N2	M0	10	0	40	16	5	One primary only	40	No radiation and/or cancer-directed surgery	None/Unknown	Yes	Systemic therapy after surgery	Alive or dead of other cause	Alive or dead due to cancer	98	Alive
1162427	Single (never married)	White	58	Male	2010	Ascending Colon	Poorly differentiated; Grade III	Positive histology	8255/3: Adenocarcinoma with mixed subtypes	Regional	T3	N2	M0	10	0	70	22	4	One primary only	40	No radiation and/or cancer-directed surgery	None/Unknown	Yes	Systemic therapy after surgery	Dead (attributable to this cancer dx)	Alive or dead due to cancer	20	Dead
1162448	Married (including common law)	Other (American Indian/AK Native, Asian/Pacific Islander)	56	Female	2010	Ascending Colon	Poorly differentiated; Grade III	Positive histology	8140/3: Adenocarcinoma, NOS	Regional	T3	N1	M0	998	0	35	21	3	One primary only	40	No radiation and/or cancer-directed surgery	None/Unknown	Yes	Systemic therapy after surgery	Alive or dead of other cause	Alive or dead due to cancer	31	Alive
1162565	Married (including common law)	White	61	Male	2010	Transverse Colon	Moderately differentiated; Grade II	Positive histology	8140/3: Adenocarcinoma, NOS	Regional	T3	N2	M0	10	0	25	21	4	One primary only	41	No radiation and/or cancer-directed surgery	None/Unknown	Yes	Systemic therapy after surgery	Alive or dead of other cause	Dead (attributable to causes other than this cancer dx)	98	Dead
1162649	Divorced	White	84	Female	2010	Cecum	Moderately differentiated; Grade II	Positive histology	8481/3: Mucin-producing adenocarcinoma	Regional	T4	N2	M0	10	999	90	18	4	One primary only	32	No radiation and/or cancer-directed surgery	None/Unknown	Yes	Systemic therapy after surgery	Alive or dead of other cause	Alive or dead due to cancer	100	Alive
1162660	Married (including common law)	Other (American Indian/AK Native, Asian/Pacific Islander)	48	Female	2010	Sigmoid Colon	Moderately differentiated; Grade II	Positive histology	8140/3: Adenocarcinoma, NOS	Distant	T3	N1	M1	10	0	75	16	2	One primary only	30	No radiation and/or cancer-directed surgery	None/Unknown	Yes	Systemic therapy after surgery	Dead (attributable to this cancer dx)	Alive or dead due to cancer	39	Dead
1162695	Widowed	White	85	Female	2010	Rectosigmoid Junction	Moderately differentiated; Grade II	Positive histology	8263/3: Adenocarcinoma in tubulovillous adenoma	Regional	T4	N0	M0	998	999	999	11	0	One primary only	30	No radiation and/or cancer-directed surgery	None/Unknown	No/Unknown	No systemic therapy and/or surgical procedures	Alive or dead of other cause	Dead (attributable to causes other than this cancer dx)	5	Dead
1162699	Single (never married)	White	53	Male	2010	Sigmoid Colon	Moderately differentiated; Grade II	Positive histology	8140/3: Adenocarcinoma, NOS	Distant	T4	N2	M1	10	998	999	0	98	One primary only	0	No radiation and/or cancer-directed surgery	None/Unknown	Yes	No systemic therapy and/or surgical procedures	Dead (attributable to this cancer dx)	Alive or dead due to cancer	12	Dead
1162828	Divorced	White	85	Female	2010	Sigmoid Colon	Poorly differentiated; Grade III	Positive histology	8140/3: Adenocarcinoma, NOS	Distant	T3	N2	M1	999	0	35	34	4	One primary only	30	No radiation and/or cancer-directed surgery	None/Unknown	No/Unknown	No systemic therapy and/or surgical procedures	Dead (attributable to this cancer dx)	Alive or dead due to cancer	17	Dead
1162887	Married (including common law)	White	71	Female	2010	Cecum	Well differentiated; Grade I	Positive histology	8140/3: Adenocarcinoma, NOS	Localized	T1	N0	M0	20	999	13	19	0	One primary only	40	No radiation and/or cancer-directed surgery	None/Unknown	No/Unknown	No systemic therapy and/or surgical procedures	Alive or dead of other cause	Alive or dead due to cancer	106	Alive
1162919	Married (including common law)	White	57	Male	2010	Cecum	Moderately differentiated; Grade II	Positive histology	8140/3: Adenocarcinoma, NOS	Localized	T3	N0	M0	20	0	43	14	0	One primary only	30	No radiation and/or cancer-directed surgery	None/Unknown	No/Unknown	No systemic therapy and/or surgical procedures	Alive or dead of other cause	Alive or dead due to cancer	105	Alive
1162928	Widowed	White	85	Female	2010	Rectosigmoid Junction	Moderately differentiated; Grade II	Positive histology	8140/3: Adenocarcinoma, NOS	Regional	T3	N0	M0	10	990	58	13	0	One primary only	30	No radiation and/or cancer-directed surgery	None/Unknown	No/Unknown	No systemic therapy and/or surgical procedures	Alive or dead of other cause	Dead (attributable to causes other than this cancer dx)	2	Dead
1162996	Married (including common law)	Black	67	Male	2010	Cecum	Poorly differentiated; Grade III	Positive histology	8140/3: Adenocarcinoma, NOS	Regional	T2	N2	M0	999	999	55	19	17	One primary only	40	No radiation and/or cancer-directed surgery	None/Unknown	Yes	Systemic therapy after surgery	Dead (attributable to this cancer dx)	Alive or dead due to cancer	7	Dead
1163028	Single (never married)	Unknown	61	Female	2010	Rectum	Moderately differentiated; Grade II	Positive histology	8263/3: Adenocarcinoma in tubulovillous adenoma	Localized	T1	N0	M0	999	0	999	0	98	One primary only	26	No radiation and/or cancer-directed surgery	None/Unknown	No/Unknown	No systemic therapy and/or surgical procedures	Alive or dead of other cause	Alive or dead due to cancer	105	Alive
1163038	Married (including common law)	White	74	Female	2010	Hepatic Flexure	Moderately differentiated; Grade II	Positive histology	8140/3: Adenocarcinoma, NOS	Regional	T2	N1	M0	10	0	38	29	2	One primary only	40	No radiation and/or cancer-directed surgery	None/Unknown	Yes	Systemic therapy after surgery	Alive or dead of other cause	Dead (attributable to causes other than this cancer dx)	8	Dead
1163073	Married (including common law)	White	45	Male	2010	Rectum	Moderately differentiated; Grade II	Positive histology	8140/3: Adenocarcinoma, NOS	Regional	T3	N0	M0	999	0	999	0	98	One primary only	50	Radiation prior to surgery	Beam radiation	Yes	Systemic therapy both before and after surgery	Alive or dead of other cause	Alive or dead due to cancer	107	Alive
1163094	Divorced	White	64	Male	2010	Ascending Colon	Moderately differentiated; Grade II	Positive histology	8140/3: Adenocarcinoma, NOS	Regional	T3	N0	M0	10	0	50	22	0	One primary only	40	No radiation and/or cancer-directed surgery	None/Unknown	No/Unknown	No systemic therapy and/or surgical procedures	Alive or dead of other cause	Alive or dead due to cancer	94	Alive
1163119	Divorced	White	49	Female	2010	Rectum	Moderately differentiated; Grade II	Positive histology	8140/3: Adenocarcinoma, NOS	Regional	T4	N1	M0	999	2	67	15	0	One primary only	30	Radiation prior to surgery	Beam radiation	Yes	Systemic therapy both before and after surgery	Dead (attributable to this cancer dx)	Alive or dead due to cancer	21	Dead
1163121	Married (including common law)	Other (American Indian/AK Native, Asian/Pacific Islander)	65	Female	2010	Sigmoid Colon	Moderately differentiated; Grade II	Positive histology	8140/3: Adenocarcinoma, NOS	Regional	T3	N2	M0	10	0	40	22	5	One primary only	40	No radiation and/or cancer-directed surgery	None/Unknown	Yes	Systemic therapy after surgery	Dead (attributable to this cancer dx)	Alive or dead due to cancer	63	Dead
1163128	Married (including common law)	White	56	Male	2010	Sigmoid Colon	Moderately differentiated; Grade II	Positive histology	8140/3: Adenocarcinoma, NOS	Regional	T1	N1	M0	999	0	10	17	1	One primary only	30	No radiation and/or cancer-directed surgery	None/Unknown	Yes	Systemic therapy after surgery	Alive or dead of other cause	Alive or dead due to cancer	105	Alive
1163178	Divorced	White	85	Female	2010	Cecum	Undifferentiated; anaplastic; Grade IV	Positive histology	8263/3: Adenocarcinoma in tubulovillous adenoma	Localized	T1	N0	M0	998	0	15	33	0	One primary only	40	No radiation and/or cancer-directed surgery	None/Unknown	No/Unknown	No systemic therapy and/or surgical procedures	Alive or dead of other cause	Dead (attributable to causes other than this cancer dx)	21	Dead
1163182	Married (including common law)	Other (American Indian/AK Native, Asian/Pacific Islander)	61	Female	2010	Rectosigmoid Junction	Moderately differentiated; Grade II	Positive histology	8140/3: Adenocarcinoma, NOS	Localized	T2	N0	M0	10	0	24	5	0	One primary only	30	No radiation and/or cancer-directed surgery	None/Unknown	No/Unknown	No systemic therapy and/or surgical procedures	Alive or dead of other cause	Alive or dead due to cancer	105	Alive
1163286	Married (including common law)	Other (American Indian/AK Native, Asian/Pacific Islander)	80	Male	2010	Sigmoid Colon	Moderately differentiated; Grade II	Positive histology	8140/3: Adenocarcinoma, NOS	Regional	T4	N2	M0	999	0	60	12	10	One primary only	30	No radiation and/or cancer-directed surgery	None/Unknown	No/Unknown	No systemic therapy and/or surgical procedures	Dead (attributable to this cancer dx)	Alive or dead due to cancer	0	Dead
1163319	Separated	Other (American Indian/AK Native, Asian/Pacific Islander)	85	Male	2010	Transverse Colon	Moderately differentiated; Grade II	Positive histology	8140/3: Adenocarcinoma, NOS	Localized	T2	N0	M0	998	0	45	15	0	One primary only	30	No radiation and/or cancer-directed surgery	None/Unknown	No/Unknown	No systemic therapy and/or surgical procedures	Alive or dead of other cause	Dead (attributable to causes other than this cancer dx)	43	Dead
1163336	Single (never married)	Other (American Indian/AK Native, Asian/Pacific Islander)	69	Male	2010	Transverse Colon	Moderately differentiated; Grade II	Positive histology	8140/3: Adenocarcinoma, NOS	Distant	T4	N0	M1	10	0	40	8	0	One primary only	30	No radiation and/or cancer-directed surgery	None/Unknown	No/Unknown	No systemic therapy and/or surgical procedures	Dead (attributable to this cancer dx)	Alive or dead due to cancer	33	Dead
1163339	Single (never married)	Other (American Indian/AK Native, Asian/Pacific Islander)	83	Female	2010	Sigmoid Colon	Poorly differentiated; Grade III	Positive histology	8140/3: Adenocarcinoma, NOS	Regional	T3	N1	M0	10	0	30	3	2	One primary only	30	No radiation and/or cancer-directed surgery	None/Unknown	No/Unknown	No systemic therapy and/or surgical procedures	Dead (attributable to this cancer dx)	Alive or dead due to cancer	21	Dead
1163340	Single (never married)	Other (American Indian/AK Native, Asian/Pacific Islander)	85	Male	2010	Rectum	Moderately differentiated; Grade II	Positive histology	8140/3: Adenocarcinoma, NOS	Localized	T1	N0	M0	20	0	999	0	98	One primary only	0	No radiation and/or cancer-directed surgery	Beam radiation	Yes	No systemic therapy and/or surgical procedures	Alive or dead of other cause	Dead (attributable to causes other than this cancer dx)	25	Dead
1163361	Single (never married)	Other (American Indian/AK Native, Asian/Pacific Islander)	75	Female	2010	Rectum	Moderately differentiated; Grade II	Positive histology	8140/3: Adenocarcinoma, NOS	Localized	T1	N0	M0	998	0	35	4	0	One primary only	30	No radiation and/or cancer-directed surgery	None/Unknown	No/Unknown	No systemic therapy and/or surgical procedures	Alive or dead of other cause	Alive or dead due to cancer	103	Alive
1163400	Married (including common law)	Other (American Indian/AK Native, Asian/Pacific Islander)	49	Female	2010	Sigmoid Colon	Moderately differentiated; Grade II	Positive histology	8140/3: Adenocarcinoma, NOS	Regional	T3	N1	M0	999	0	45	14	3	One primary only	30	No radiation and/or cancer-directed surgery	None/Unknown	Yes	Systemic therapy after surgery	Alive or dead of other cause	Alive or dead due to cancer	104	Alive
1163472	Single (never married)	Other (American Indian/AK Native, Asian/Pacific Islander)	85	Female	2010	Splenic Flexure	Moderately differentiated; Grade II	Positive histology	8140/3: Adenocarcinoma, NOS	Regional	T3	N1	M0	10	0	40	30	1	One primary only	30	No radiation and/or cancer-directed surgery	None/Unknown	No/Unknown	No systemic therapy and/or surgical procedures	Alive or dead of other cause	Dead (attributable to causes other than this cancer dx)	104	Dead
1163552	Widowed	Black	85	Female	2010	Ascending Colon	Poorly differentiated; Grade III	Positive histology	8480/3: Mucinous adenocarcinoma	Regional	T3	N0	M0	10	0	40	18	0	One primary only	40	No radiation and/or cancer-directed surgery	None/Unknown	No/Unknown	No systemic therapy and/or surgical procedures	Alive or dead of other cause	Dead (attributable to causes other than this cancer dx)	38	Dead
1163657	Single (never married)	Black	52	Male	2010	Rectosigmoid Junction	Moderately differentiated; Grade II	Positive histology	8140/3: Adenocarcinoma, NOS	Distant	T3	N1	M1	10	0	75	22	2	One primary only	30	No radiation and/or cancer-directed surgery	None/Unknown	No/Unknown	No systemic therapy and/or surgical procedures	Dead (attributable to this cancer dx)	Alive or dead due to cancer	2	Dead
1163694	Unknown	Black	59	Female	2010	Sigmoid Colon	Poorly differentiated; Grade III	Positive histology	8263/3: Adenocarcinoma in tubulovillous adenoma	Distant	T1	N0	M1	20	0	999	0	98	One primary only	28	No radiation and/or cancer-directed surgery	None/Unknown	Yes	Systemic therapy after surgery	Dead (attributable to this cancer dx)	Alive or dead due to cancer	26	Dead
1163702	Unknown	White	57	Male	2010	Descending Colon	Moderately differentiated; Grade II	Positive histology	8140/3: Adenocarcinoma, NOS	Regional	T3	N1	M0	20	999	50	22	2	One primary only	40	No radiation and/or cancer-directed surgery	None/Unknown	Yes	Systemic therapy after surgery	Alive or dead of other cause	Dead (attributable to causes other than this cancer dx)	70	Dead
1163723	Widowed	White	78	Female	2010	Transverse Colon	Moderately differentiated; Grade II	Positive histology	8140/3: Adenocarcinoma, NOS	Localized	T3	N0	M0	998	0	28	6	0	One primary only	30	No radiation and/or cancer-directed surgery	None/Unknown	Yes	Systemic therapy after surgery	Dead (attributable to this cancer dx)	Alive or dead due to cancer	70	Dead
1163790	Married (including common law)	White	58	Female	2010	Appendix	Poorly differentiated; Grade III	Positive histology	8490/3: Signet ring cell carcinoma	Distant	T4	N0	M0	10	999	999	11	0	One primary only	41	No radiation and/or cancer-directed surgery	None/Unknown	Yes	Systemic therapy after surgery	Dead (attributable to this cancer dx)	Alive or dead due to cancer	30	Dead
1163814	Married (including common law)	White	62	Male	2010	Sigmoid Colon	Moderately differentiated; Grade II	Positive histology	8210/3: Adenocarcinoma in adenomatous polyp	Localized	T1	N0	M0	20	0	999	0	98	One primary only	26	No radiation and/or cancer-directed surgery	None/Unknown	No/Unknown	No systemic therapy and/or surgical procedures	Alive or dead of other cause	Alive or dead due to cancer	107	Alive
1163817	Married (including common law)	Black	72	Male	2010	Rectum	Well differentiated; Grade I	Positive histology	8140/3: Adenocarcinoma, NOS	Regional	T1	N1	M0	998	0	25	22	1	One primary only	30	No radiation and/or cancer-directed surgery	None/Unknown	No/Unknown	No systemic therapy and/or surgical procedures	Dead (attributable to this cancer dx)	Alive or dead due to cancer	0	Dead
1163834	Widowed	White	81	Female	2010	Sigmoid Colon	Moderately differentiated; Grade II	Positive histology	8140/3: Adenocarcinoma, NOS	Regional	T3	N0	M0	998	0	40	17	0	One primary only	30	No radiation and/or cancer-directed surgery	None/Unknown	No/Unknown	No systemic therapy and/or surgical procedures	Dead (attributable to this cancer dx)	Alive or dead due to cancer	3	Dead
1163881	Married (including common law)	White	62	Male	2010	Rectum	Moderately differentiated; Grade II	Positive histology	8140/3: Adenocarcinoma, NOS	Regional	T3	N1	M0	20	0	65	13	1	One primary only	30	Radiation after surgery	Beam radiation	No/Unknown	No systemic therapy and/or surgical procedures	Alive or dead of other cause	Alive or dead due to cancer	102	Alive
1163963	Widowed	Other (American Indian/AK Native, Asian/Pacific Islander)	83	Female	2010	Transverse Colon	Moderately differentiated; Grade II	Positive histology	8261/3: Adenocarcinoma in villous adenoma	Regional	T3	N1	M0	10	0	60	14	2	One primary only	30	No radiation and/or cancer-directed surgery	None/Unknown	No/Unknown	No systemic therapy and/or surgical procedures	Dead (attributable to this cancer dx)	Alive or dead due to cancer	40	Dead
1163966	Divorced	Other (American Indian/AK Native, Asian/Pacific Islander)	45	Female	2010	Sigmoid Colon	Moderately differentiated; Grade II	Positive histology	8263/3: Adenocarcinoma in tubulovillous adenoma	Localized	T2	N0	M0	20	999	52	12	0	One primary only	30	No radiation and/or cancer-directed surgery	None/Unknown	No/Unknown	No systemic therapy and/or surgical procedures	Alive or dead of other cause	Alive or dead due to cancer	99	Alive
1163976	Divorced	Other (American Indian/AK Native, Asian/Pacific Islander)	68	Male	2010	Ascending Colon	Moderately differentiated; Grade II	Positive histology	8210/3: Adenocarcinoma in adenomatous polyp	Localized	T1	N0	M0	20	999	25	8	0	One primary only	40	No radiation and/or cancer-directed surgery	None/Unknown	No/Unknown	No systemic therapy and/or surgical procedures	Alive or dead of other cause	Alive or dead due to cancer	107	Alive
1163977	Widowed	Other (American Indian/AK Native, Asian/Pacific Islander)	82	Female	2010	Cecum	Moderately differentiated; Grade II	Positive histology	8140/3: Adenocarcinoma, NOS	Distant	T4	N1	M1	10	999	78	1	1	One primary only	40	No radiation and/or cancer-directed surgery	None/Unknown	Yes	Systemic therapy after surgery	Dead (attributable to this cancer dx)	Alive or dead due to cancer	13	Dead
1164034	Married (including common law)	White	85	Male	2010	Rectum	Moderately differentiated; Grade II	Positive histology	8210/3: Adenocarcinoma in adenomatous polyp	Localized	T1	N0	M0	10	999	35	0	98	One primary only	20	No radiation and/or cancer-directed surgery	None/Unknown	No/Unknown	No systemic therapy and/or surgical procedures	Alive or dead of other cause	Dead (attributable to causes other than this cancer dx)	3	Dead
1164145	Married (including common law)	Other (American Indian/AK Native, Asian/Pacific Islander)	69	Female	2010	Sigmoid Colon	Poorly differentiated; Grade III	Positive histology	8261/3: Adenocarcinoma in villous adenoma	Regional	T4	N0	M0	10	999	100	31	0	One primary only	32	No radiation and/or cancer-directed surgery	None/Unknown	Yes	Systemic therapy after surgery	Dead (attributable to this cancer dx)	Alive or dead due to cancer	70	Dead
1164151	Married (including common law)	Other (American Indian/AK Native, Asian/Pacific Islander)	85	Male	2010	Sigmoid Colon	Moderately differentiated; Grade II	Positive histology	8140/3: Adenocarcinoma, NOS	Regional	T3	N1	M0	10	999	55	16	1	One primary only	32	No radiation and/or cancer-directed surgery	None/Unknown	No/Unknown	No systemic therapy and/or surgical procedures	Alive or dead of other cause	Dead (attributable to causes other than this cancer dx)	41	Dead
1164153	Widowed	White	84	Female	2010	Rectum	Moderately differentiated; Grade II	Positive histology	8210/3: Adenocarcinoma in adenomatous polyp	Localized	T2	N0	M0	20	999	42	0	98	One primary only	20	No radiation and/or cancer-directed surgery	None/Unknown	No/Unknown	No systemic therapy and/or surgical procedures	Alive or dead of other cause	Alive or dead due to cancer	107	Alive
1164180	Married (including common law)	White	85	Male	2010	Cecum	Moderately differentiated; Grade II	Positive histology	8140/3: Adenocarcinoma, NOS	Regional	T3	N1	M0	20	0	32	12	3	One primary only	40	No radiation and/or cancer-directed surgery	None/Unknown	No/Unknown	No systemic therapy and/or surgical procedures	Dead (attributable to this cancer dx)	Alive or dead due to cancer	8	Dead
1164236	Married (including common law)	White	48	Male	2010	Rectum	Moderately differentiated; Grade II	Positive histology	8140/3: Adenocarcinoma, NOS	Regional	T3	N1	M0	999	0	999	14	0	One primary only	30	Radiation prior to surgery	Radiation, NOS method or source not specified	Yes	Systemic therapy before surgery	Alive or dead of other cause	Alive or dead due to cancer	106	Alive
1164252	Widowed	Other (American Indian/AK Native, Asian/Pacific Islander)	85	Female	2010	Cecum	Poorly differentiated; Grade III	Positive histology	8481/3: Mucin-producing adenocarcinoma	Distant	T4	N1	M0	20	990	45	18	1	One primary only	30	No radiation and/or cancer-directed surgery	None/Unknown	No/Unknown	No systemic therapy and/or surgical procedures	Alive or dead of other cause	Dead (attributable to causes other than this cancer dx)	30	Dead
1164255	Married (including common law)	White	71	Female	2010	Ascending Colon	Poorly differentiated; Grade III	Positive histology	8140/3: Adenocarcinoma, NOS	Regional	T4	N1	M0	10	0	98	21	3	One primary only	40	No radiation and/or cancer-directed surgery	None/Unknown	Yes	Systemic therapy after surgery	Dead (attributable to this cancer dx)	Alive or dead due to cancer	31	Dead
1164266	Single (never married)	White	57	Male	2010	Rectum	Moderately differentiated; Grade II	Positive histology	8140/3: Adenocarcinoma, NOS	Localized	T1	N0	M0	20	998	999	0	98	One primary only	0	No radiation and/or cancer-directed surgery	Beam radiation	Yes	No systemic therapy and/or surgical procedures	Alive or dead of other cause	Alive or dead due to cancer	101	Alive
1164299	Married (including common law)	White	74	Male	2010	Cecum	Moderately differentiated; Grade II	Positive histology	8140/3: Adenocarcinoma, NOS	Regional	T2	N1	M0	20	0	30	19	1	One primary only	30	No radiation and/or cancer-directed surgery	None/Unknown	Yes	Systemic therapy after surgery	Alive or dead of other cause	Alive or dead due to cancer	101	Alive
1164339	Divorced	White	55	Male	2010	Sigmoid Colon	Moderately differentiated; Grade II	Positive histology	8261/3: Adenocarcinoma in villous adenoma	Localized	T2	N0	M0	20	0	18	14	0	One primary only	30	No radiation and/or cancer-directed surgery	None/Unknown	No/Unknown	No systemic therapy and/or surgical procedures	Alive or dead of other cause	Alive or dead due to cancer	100	Alive
1164345	Divorced	White	84	Female	2010	Ascending Colon	Poorly differentiated; Grade III	Positive histology	8140/3: Adenocarcinoma, NOS	Regional	T3	N1	M0	20	0	30	25	2	One primary only	40	No radiation and/or cancer-directed surgery	None/Unknown	Yes	Systemic therapy after surgery	Dead (attributable to this cancer dx)	Alive or dead due to cancer	74	Dead
1164636	Single (never married)	White	72	Male	2010	Cecum	Moderately differentiated; Grade II	Positive histology	8140/3: Adenocarcinoma, NOS	Localized	T2	N0	M0	10	0	40	12	0	One primary only	40	No radiation and/or cancer-directed surgery	None/Unknown	No/Unknown	No systemic therapy and/or surgical procedures	Alive or dead of other cause	Dead (attributable to causes other than this cancer dx)	27	Dead
1164845	Married (including common law)	Black	67	Female	2010	Ascending Colon	Moderately differentiated; Grade II	Positive histology	8140/3: Adenocarcinoma, NOS	Regional	T3	N1	M0	999	0	34	32	1	One primary only	40	No radiation and/or cancer-directed surgery	None/Unknown	No/Unknown	No systemic therapy and/or surgical procedures	Alive or dead of other cause	Alive or dead due to cancer	102	Alive
1164846	Married (including common law)	White	50	Female	2010	Sigmoid Colon	Moderately differentiated; Grade II	Positive histology	8140/3: Adenocarcinoma, NOS	Regional	T3	N2	M0	20	1	25	24	14	One primary only	40	No radiation and/or cancer-directed surgery	None/Unknown	Yes	Systemic therapy after surgery	Dead (attributable to this cancer dx)	Alive or dead due to cancer	32	Dead
1164847	Married (including common law)	White	57	Male	2010	Cecum	Moderately differentiated; Grade II	Positive histology	8140/3: Adenocarcinoma, NOS	Localized	T2	N0	M0	20	0	25	14	0	One primary only	40	No radiation and/or cancer-directed surgery	None/Unknown	No/Unknown	No systemic therapy and/or surgical procedures	Alive or dead of other cause	Alive or dead due to cancer	105	Alive
1164850	Widowed	White	84	Female	2010	Transverse Colon	Moderately differentiated; Grade II	Positive histology	8140/3: Adenocarcinoma, NOS	Regional	T3	N1	M0	998	0	25	22	2	One primary only	40	No radiation and/or cancer-directed surgery	None/Unknown	Yes	Systemic therapy after surgery	Dead (attributable to this cancer dx)	Alive or dead due to cancer	28	Dead
1164895	Married (including common law)	Other (American Indian/AK Native, Asian/Pacific Islander)	47	Male	2010	Sigmoid Colon	Moderately differentiated; Grade II	Positive histology	8140/3: Adenocarcinoma, NOS	Regional	T4	N0	M0	20	0	60	15	0	One primary only	40	No radiation and/or cancer-directed surgery	None/Unknown	Yes	Systemic therapy after surgery	Alive or dead of other cause	Alive or dead due to cancer	102	Alive
1164897	Divorced	White	68	Female	2010	Ascending Colon	Poorly differentiated; Grade III	Positive histology	8140/3: Adenocarcinoma, NOS	Regional	T3	N1	M0	998	999	50	7	3	One primary only	40	No radiation and/or cancer-directed surgery	None/Unknown	No/Unknown	No systemic therapy and/or surgical procedures	Alive or dead of other cause	Dead (attributable to causes other than this cancer dx)	24	Dead
1164945	Widowed	White	70	Female	2010	Sigmoid Colon	Well differentiated; Grade I	Positive histology	8480/3: Mucinous adenocarcinoma	Distant	T4	N2	M1	10	990	60	13	9	One primary only	30	No radiation and/or cancer-directed surgery	None/Unknown	Yes	Systemic therapy after surgery	Dead (attributable to this cancer dx)	Alive or dead due to cancer	43	Dead
1164974	Married (including common law)	Other (American Indian/AK Native, Asian/Pacific Islander)	83	Male	2010	Ascending Colon	Moderately differentiated; Grade II	Positive histology	8140/3: Adenocarcinoma, NOS	Regional	T3	N1	M0	20	0	36	19	1	One primary only	40	No radiation and/or cancer-directed surgery	None/Unknown	Yes	Systemic therapy after surgery	Alive or dead of other cause	Alive or dead due to cancer	107	Alive
1164978	Widowed	White	81	Female	2010	Sigmoid Colon	Well differentiated; Grade I	Positive histology	8140/3: Adenocarcinoma, NOS	Regional	T3	N0	M0	998	0	49	13	0	One primary only	30	No radiation and/or cancer-directed surgery	None/Unknown	No/Unknown	No systemic therapy and/or surgical procedures	Dead (attributable to this cancer dx)	Alive or dead due to cancer	0	Dead
1164980	Married (including common law)	White	74	Female	2010	Transverse Colon	Poorly differentiated; Grade III	Positive histology	8140/3: Adenocarcinoma, NOS	Regional	T3	N0	M0	20	0	35	19	0	One primary only	30	No radiation and/or cancer-directed surgery	None/Unknown	No/Unknown	No systemic therapy and/or surgical procedures	Alive or dead of other cause	Dead (attributable to causes other than this cancer dx)	63	Dead
1165040	Married (including common law)	White	57	Female	2010	Sigmoid Colon	Moderately differentiated; Grade II	Positive histology	8140/3: Adenocarcinoma, NOS	Regional	T3	N1	M0	20	2	45	19	2	One primary only	30	No radiation and/or cancer-directed surgery	None/Unknown	Yes	Systemic therapy after surgery	Alive or dead of other cause	Dead (attributable to causes other than this cancer dx)	40	Dead
1165042	Divorced	White	77	Female	2010	Rectum	Moderately differentiated; Grade II	Positive histology	8140/3: Adenocarcinoma, NOS	Localized	T2	N0	M0	20	0	12	13	0	One primary only	30	Radiation prior to surgery	Beam radiation	Yes	Systemic therapy before surgery	Alive or dead of other cause	Alive or dead due to cancer	106	Alive
1165050	Divorced	White	72	Female	2010	Ascending Colon	Moderately differentiated; Grade II	Positive histology	8140/3: Adenocarcinoma, NOS	Localized	T2	N0	M0	998	0	20	12	0	One primary only	40	No radiation and/or cancer-directed surgery	None/Unknown	No/Unknown	No systemic therapy and/or surgical procedures	Alive or dead of other cause	Alive or dead due to cancer	106	Alive
1165168	Married (including common law)	White	52	Male	2010	Transverse Colon	Poorly differentiated; Grade III	Positive histology	8140/3: Adenocarcinoma, NOS	Regional	T3	N0	M0	20	0	60	41	0	One primary only	40	No radiation and/or cancer-directed surgery	None/Unknown	No/Unknown	No systemic therapy and/or surgical procedures	Alive or dead of other cause	Alive or dead due to cancer	107	Alive
1165174	Divorced	White	52	Female	2010	Sigmoid Colon	Moderately differentiated; Grade II	Positive histology	8140/3: Adenocarcinoma, NOS	Regional	T4	N0	M0	10	0	999	18	0	One primary only	30	No radiation and/or cancer-directed surgery	None/Unknown	Yes	Systemic therapy after surgery	Alive or dead of other cause	Alive or dead due to cancer	103	Alive
1165201	Married (including common law)	White	72	Female	2010	Splenic Flexure	Moderately differentiated; Grade II	Positive histology	8263/3: Adenocarcinoma in tubulovillous adenoma	Regional	T2	N1	M0	999	0	75	13	1	One primary only	40	No radiation and/or cancer-directed surgery	None/Unknown	Yes	Systemic therapy after surgery	Alive or dead of other cause	Alive or dead due to cancer	104	Alive
1165266	Married (including common law)	White	71	Male	2010	Transverse Colon	Moderately differentiated; Grade II	Positive histology	8140/3: Adenocarcinoma, NOS	Regional	T3	N1	M0	998	0	60	23	2	One primary only	30	No radiation and/or cancer-directed surgery	None/Unknown	Yes	Systemic therapy after surgery	Alive or dead of other cause	Alive or dead due to cancer	96	Alive
1165274	Married (including common law)	White	66	Male	2010	Cecum	Moderately differentiated; Grade II	Positive histology	8140/3: Adenocarcinoma, NOS	Regional	T3	N2	M0	998	990	65	32	15	One primary only	40	No radiation and/or cancer-directed surgery	None/Unknown	Yes	Systemic therapy after surgery	Alive or dead of other cause	Dead (attributable to causes other than this cancer dx)	10	Dead
1165282	Widowed	White	85	Male	2010	Sigmoid Colon	Poorly differentiated; Grade III	Positive histology	8140/3: Adenocarcinoma, NOS	Distant	T4	N2	M0	998	0	60	9	7	One primary only	32	No radiation and/or cancer-directed surgery	None/Unknown	No/Unknown	No systemic therapy and/or surgical procedures	Dead (attributable to this cancer dx)	Alive or dead due to cancer	9	Dead
1165283	Single (never married)	White	85	Male	2010	Cecum	Undifferentiated; anaplastic; Grade IV	Positive histology	8140/3: Adenocarcinoma, NOS	Distant	T3	N2	M1	10	0	70	14	7	One primary only	40	No radiation and/or cancer-directed surgery	None/Unknown	No/Unknown	No systemic therapy and/or surgical procedures	Dead (attributable to this cancer dx)	Alive or dead due to cancer	1	Dead
1165307	Single (never married)	White	69	Female	2010	Ascending Colon	Moderately differentiated; Grade II	Positive histology	8140/3: Adenocarcinoma, NOS	Localized	T2	N0	M0	20	0	50	34	0	One primary only	40	No radiation and/or cancer-directed surgery	None/Unknown	No/Unknown	No systemic therapy and/or surgical procedures	Alive or dead of other cause	Dead (attributable to causes other than this cancer dx)	64	Dead
1165309	Married (including common law)	White	69	Male	2010	Sigmoid Colon	Moderately differentiated; Grade II	Positive histology	8140/3: Adenocarcinoma, NOS	Regional	T3	N1	M0	10	0	35	12	3	One primary only	30	No radiation and/or cancer-directed surgery	None/Unknown	Yes	Systemic therapy after surgery	Dead (attributable to this cancer dx)	Alive or dead due to cancer	59	Dead
1165327	Divorced	White	78	Female	2010	Sigmoid Colon	Moderately differentiated; Grade II	Positive histology	8140/3: Adenocarcinoma, NOS	Regional	T3	N0	M0	10	0	35	18	0	One primary only	30	No radiation and/or cancer-directed surgery	None/Unknown	No/Unknown	No systemic therapy and/or surgical procedures	Alive or dead of other cause	Dead (attributable to causes other than this cancer dx)	14	Dead
1165330	Married (including common law)	White	85	Male	2010	Descending Colon	Moderately differentiated; Grade II	Positive histology	8140/3: Adenocarcinoma, NOS	Localized	T3	N0	M0	999	0	49	11	0	One primary only	40	No radiation and/or cancer-directed surgery	None/Unknown	No/Unknown	No systemic therapy and/or surgical procedures	Alive or dead of other cause	Dead (attributable to causes other than this cancer dx)	27	Dead
1165362	Single (never married)	White	64	Female	2010	Rectum	Moderately differentiated; Grade II	Positive histology	8263/3: Adenocarcinoma in tubulovillous adenoma	Localized	T1	N0	M0	999	0	2	8	0	One primary only	30	No radiation and/or cancer-directed surgery	None/Unknown	No/Unknown	No systemic therapy and/or surgical procedures	Alive or dead of other cause	Alive or dead due to cancer	105	Alive
1165411	Widowed	Black	81	Male	2010	Splenic Flexure	Moderately differentiated; Grade II	Positive histology	8140/3: Adenocarcinoma, NOS	Regional	T3	N0	M0	10	0	40	31	0	One primary only	40	No radiation and/or cancer-directed surgery	None/Unknown	No/Unknown	No systemic therapy and/or surgical procedures	Alive or dead of other cause	Alive or dead due to cancer	103	Alive
1165435	Married (including common law)	Black	59	Female	2010	Cecum	Moderately differentiated; Grade II	Positive histology	8210/3: Adenocarcinoma in adenomatous polyp	Localized	T1	N0	M0	998	0	999	36	0	One primary only	40	No radiation and/or cancer-directed surgery	None/Unknown	No/Unknown	No systemic therapy and/or surgical procedures	Alive or dead of other cause	Alive or dead due to cancer	102	Alive
1165468	Single (never married)	White	61	Male	2010	Descending Colon	Moderately differentiated; Grade II	Positive histology	8140/3: Adenocarcinoma, NOS	Regional	T4	N2	M0	999	0	23	22	4	One primary only	40	No radiation and/or cancer-directed surgery	None/Unknown	Yes	Systemic therapy after surgery	Alive or dead of other cause	Alive or dead due to cancer	102	Alive
1165543	Married (including common law)	White	84	Male	2010	Descending Colon	Moderately differentiated; Grade II	Positive histology	8140/3: Adenocarcinoma, NOS	Regional	T3	N0	M0	998	0	50	17	0	One primary only	30	No radiation and/or cancer-directed surgery	None/Unknown	No/Unknown	No systemic therapy and/or surgical procedures	Alive or dead of other cause	Dead (attributable to causes other than this cancer dx)	10	Dead
1165557	Widowed	White	85	Female	2010	Cecum	Moderately differentiated; Grade II	Positive histology	8480/3: Mucinous adenocarcinoma	Regional	T4	N1	M0	20	0	45	15	2	One primary only	40	No radiation and/or cancer-directed surgery	None/Unknown	No/Unknown	No systemic therapy and/or surgical procedures	Alive or dead of other cause	Alive or dead due to cancer	99	Alive
1165584	Married (including common law)	White	49	Female	2010	Rectum	Moderately differentiated; Grade II	Positive histology	8140/3: Adenocarcinoma, NOS	Regional	T3	N1	M0	999	0	999	4	2	One primary only	30	Radiation prior to surgery	Beam radiation	Yes	Systemic therapy before surgery	Alive or dead of other cause	Alive or dead due to cancer	102	Alive
1165601	Married (including common law)	White	28	Female	2010	Sigmoid Colon	Moderately differentiated; Grade II	Positive histology	8480/3: Mucinous adenocarcinoma	Regional	T3	N0	M0	20	1	70	41	0	One primary only	30	No radiation and/or cancer-directed surgery	None/Unknown	No/Unknown	No systemic therapy and/or surgical procedures	Alive or dead of other cause	Alive or dead due to cancer	64	Alive
1165733	Single (never married)	Other (American Indian/AK Native, Asian/Pacific Islander)	49	Male	2010	Sigmoid Colon	Moderately differentiated; Grade II	Positive histology	8140/3: Adenocarcinoma, NOS	Distant	T1	N0	M1	10	0	36	0	98	One primary only	0	No radiation and/or cancer-directed surgery	None/Unknown	Yes	No systemic therapy and/or surgical procedures	Dead (attributable to this cancer dx)	Alive or dead due to cancer	23	Dead
1165735	Married (including common law)	White	85	Female	2010	Hepatic Flexure	Moderately differentiated; Grade II	Positive histology	8140/3: Adenocarcinoma, NOS	Regional	T3	N1	M0	20	0	50	13	3	One primary only	40	No radiation and/or cancer-directed surgery	None/Unknown	Yes	Systemic therapy after surgery	Alive or dead of other cause	Alive or dead due to cancer	105	Alive
1165775	Married (including common law)	White	75	Female	2010	Rectosigmoid Junction	Moderately differentiated; Grade II	Positive histology	8140/3: Adenocarcinoma, NOS	Regional	T2	N1	M0	20	0	24	16	2	One primary only	30	No radiation and/or cancer-directed surgery	None/Unknown	Yes	Systemic therapy after surgery	Alive or dead of other cause	Alive or dead due to cancer	105	Alive
1165778	Widowed	Other (American Indian/AK Native, Asian/Pacific Islander)	85	Female	2010	Sigmoid Colon	Moderately differentiated; Grade II	Positive histology	8140/3: Adenocarcinoma, NOS	Regional	T4	N1	M0	10	0	29	35	3	One primary only	40	No radiation and/or cancer-directed surgery	None/Unknown	No/Unknown	No systemic therapy and/or surgical procedures	Dead (attributable to this cancer dx)	Alive or dead due to cancer	59	Dead
1165804	Divorced	White	59	Female	2010	Cecum	Moderately differentiated; Grade II	Positive histology	8140/3: Adenocarcinoma, NOS	Regional	T3	N2	M0	20	0	85	41	18	One primary only	40	No radiation and/or cancer-directed surgery	None/Unknown	Yes	Systemic therapy after surgery	Dead (attributable to this cancer dx)	Alive or dead due to cancer	14	Dead
1165828	Widowed	White	84	Female	2010	Cecum	Undifferentiated; anaplastic; Grade IV	Positive histology	8140/3: Adenocarcinoma, NOS	Regional	T4	N0	M0	10	0	115	17	0	One primary only	50	No radiation and/or cancer-directed surgery	None/Unknown	No/Unknown	No systemic therapy and/or surgical procedures	Alive or dead of other cause	Dead (attributable to causes other than this cancer dx)	11	Dead
1165829	Married (including common law)	White	72	Female	2010	Cecum	Poorly differentiated; Grade III	Positive histology	8140/3: Adenocarcinoma, NOS	Regional	T4	N0	M0	20	0	55	16	0	One primary only	40	No radiation and/or cancer-directed surgery	None/Unknown	Yes	Systemic therapy after surgery	Alive or dead of other cause	Dead (attributable to causes other than this cancer dx)	90	Dead
1165839	Single (never married)	White	52	Female	2010	Rectosigmoid Junction	Poorly differentiated; Grade III	Positive histology	8140/3: Adenocarcinoma, NOS	Distant	T4	N2	M1	10	0	60	15	4	One primary only	30	No radiation and/or cancer-directed surgery	None/Unknown	Yes	Systemic therapy after surgery	Dead (attributable to this cancer dx)	Alive or dead due to cancer	4	Dead
1165864	Unknown	White	68	Male	2010	Rectosigmoid Junction	Moderately differentiated; Grade II	Positive histology	8210/3: Adenocarcinoma in adenomatous polyp	Localized	T1	N0	M0	998	998	2	0	98	One primary only	26	No radiation and/or cancer-directed surgery	None/Unknown	No/Unknown	No systemic therapy and/or surgical procedures	Alive or dead of other cause	Alive or dead due to cancer	100	Alive
1165968	Widowed	White	77	Female	2010	Hepatic Flexure	Moderately differentiated; Grade II	Positive histology	8480/3: Mucinous adenocarcinoma	Localized	T2	N0	M0	998	0	38	29	0	One primary only	40	No radiation and/or cancer-directed surgery	None/Unknown	No/Unknown	No systemic therapy and/or surgical procedures	Alive or dead of other cause	Alive or dead due to cancer	102	Alive
1166012	Single (never married)	White	69	Male	2010	Rectum	Moderately differentiated; Grade II	Positive histology	8140/3: Adenocarcinoma, NOS	Regional	T3	N1	M0	999	0	40	3	1	One primary only	30	Radiation prior to surgery	Beam radiation	Yes	Systemic therapy before surgery	Alive or dead of other cause	Alive or dead due to cancer	103	Alive
1166162	Married (including common law)	White	68	Female	2010	Rectum	Moderately differentiated; Grade II	Positive histology	8261/3: Adenocarcinoma in villous adenoma	Regional	T3	N1	M0	20	0	30	22	0	One primary only	50	Radiation prior to surgery	Beam radiation	Yes	Systemic therapy both before and after surgery	Dead (attributable to this cancer dx)	Alive or dead due to cancer	42	Dead
1166164	Single (never married)	White	55	Male	2010	Sigmoid Colon	Moderately differentiated; Grade II	Positive histology	8261/3: Adenocarcinoma in villous adenoma	Localized	T1	N0	M0	999	0	999	2	0	One primary only	30	No radiation and/or cancer-directed surgery	None/Unknown	No/Unknown	No systemic therapy and/or surgical procedures	Alive or dead of other cause	Alive or dead due to cancer	97	Alive
1166175	Married (including common law)	White	60	Female	2010	Cecum	Moderately differentiated; Grade II	Positive histology	8140/3: Adenocarcinoma, NOS	Localized	T2	N0	M0	20	0	999	22	0	One primary only	40	No radiation and/or cancer-directed surgery	None/Unknown	No/Unknown	No systemic therapy and/or surgical procedures	Alive or dead of other cause	Alive or dead due to cancer	96	Alive
1166180	Divorced	White	84	Male	2010	Transverse Colon	Moderately differentiated; Grade II	Positive histology	8261/3: Adenocarcinoma in villous adenoma	Localized	T3	N0	M0	10	999	999	21	0	One primary only	40	No radiation and/or cancer-directed surgery	None/Unknown	No/Unknown	No systemic therapy and/or surgical procedures	Alive or dead of other cause	Dead (attributable to causes other than this cancer dx)	56	Dead
1166202	Single (never married)	White	61	Female	2010	Rectum	Moderately differentiated; Grade II	Positive histology	8140/3: Adenocarcinoma, NOS	Regional	T2	N1	M0	20	0	39	12	0	One primary only	50	Radiation prior to surgery	Beam radiation	Yes	Systemic therapy before surgery	Alive or dead of other cause	Alive or dead due to cancer	104	Alive
1166222	Married (including common law)	Other (American Indian/AK Native, Asian/Pacific Islander)	74	Male	2010	Descending Colon	Moderately differentiated; Grade II	Positive histology	8140/3: Adenocarcinoma, NOS	Regional	T3	N1	M0	20	0	45	24	1	One primary only	40	No radiation and/or cancer-directed surgery	None/Unknown	No/Unknown	No systemic therapy and/or surgical procedures	Alive or dead of other cause	Alive or dead due to cancer	101	Alive
1166275	Married (including common law)	White	78	Male	2010	Ascending Colon	Moderately differentiated; Grade II	Positive histology	8210/3: Adenocarcinoma in adenomatous polyp	Regional	T3	N1	M0	998	0	35	21	1	One primary only	40	No radiation and/or cancer-directed surgery	None/Unknown	No/Unknown	No systemic therapy and/or surgical procedures	Alive or dead of other cause	Alive or dead due to cancer	104	Alive
1166311	Single (never married)	White	65	Male	2010	Cecum	Poorly differentiated; Grade III	Positive histology	8140/3: Adenocarcinoma, NOS	Distant	T4	N2	M1	998	2	70	13	5	One primary only	30	No radiation and/or cancer-directed surgery	None/Unknown	Yes	Systemic therapy after surgery	Dead (attributable to this cancer dx)	Alive or dead due to cancer	18	Dead
1166312	Divorced	Other (American Indian/AK Native, Asian/Pacific Islander)	52	Female	2010	Sigmoid Colon	Moderately differentiated; Grade II	Positive histology	8140/3: Adenocarcinoma, NOS	Regional	T3	N1	M0	10	5	55	6	1	One primary only	40	No radiation and/or cancer-directed surgery	None/Unknown	Yes	Systemic therapy after surgery	Dead (attributable to this cancer dx)	Alive or dead due to cancer	39	Dead
1166344	Married (including common law)	Other (American Indian/AK Native, Asian/Pacific Islander)	79	Male	2010	Rectum	Moderately differentiated; Grade II	Positive histology	8140/3: Adenocarcinoma, NOS	Localized	T3	N0	M0	10	0	20	8	0	One primary only	50	No radiation and/or cancer-directed surgery	None/Unknown	No/Unknown	No systemic therapy and/or surgical procedures	Alive or dead of other cause	Alive or dead due to cancer	99	Alive
1166402	Single (never married)	White	30	Male	2010	Sigmoid Colon	Moderately differentiated; Grade II	Positive histology	8140/3: Adenocarcinoma, NOS	Regional	T3	N1	M0	20	0	50	16	1	One primary only	40	No radiation and/or cancer-directed surgery	None/Unknown	Yes	Systemic therapy after surgery	Alive or dead of other cause	Alive or dead due to cancer	103	Alive
1166407	Married (including common law)	White	48	Female	2010	Sigmoid Colon	Moderately differentiated; Grade II	Positive histology	8140/3: Adenocarcinoma, NOS	Localized	T3	N0	M0	10	0	45	15	0	One primary only	40	No radiation and/or cancer-directed surgery	None/Unknown	Yes	Systemic therapy after surgery	Alive or dead of other cause	Alive or dead due to cancer	32	Alive
1166480	Widowed	Other (American Indian/AK Native, Asian/Pacific Islander)	80	Female	2010	Large Intestine, NOS	Moderately differentiated; Grade II	Positive histology	8140/3: Adenocarcinoma, NOS	Distant	T4	N0	M1	998	990	30	0	98	One primary only	30	No radiation and/or cancer-directed surgery	None/Unknown	No/Unknown	No systemic therapy and/or surgical procedures	Dead (attributable to this cancer dx)	Alive or dead due to cancer	5	Dead
1166494	Divorced	Black	39	Female	2010	Sigmoid Colon	Moderately differentiated; Grade II	Positive histology	8210/3: Adenocarcinoma in adenomatous polyp	Regional	T2	N2	M0	999	0	20	14	12	One primary only	30	Radiation after surgery	Beam radiation	Yes	Systemic therapy after surgery	Alive or dead of other cause	Alive or dead due to cancer	101	Alive
1166554	Married (including common law)	White	53	Female	2010	Rectosigmoid Junction	Moderately differentiated; Grade II	Positive histology	8263/3: Adenocarcinoma in tubulovillous adenoma	Localized	T2	N0	M0	998	0	27	26	0	One primary only	30	No radiation and/or cancer-directed surgery	None/Unknown	No/Unknown	No systemic therapy and/or surgical procedures	Alive or dead of other cause	Alive or dead due to cancer	101	Alive
1166586	Married (including common law)	White	67	Female	2010	Cecum	Moderately differentiated; Grade II	Positive histology	8140/3: Adenocarcinoma, NOS	Regional	T3	N0	M0	20	0	23	19	0	One primary only	40	No radiation and/or cancer-directed surgery	None/Unknown	No/Unknown	No systemic therapy and/or surgical procedures	Alive or dead of other cause	Alive or dead due to cancer	101	Alive
1166643	Single (never married)	Black	50	Female	2010	Splenic Flexure	Moderately differentiated; Grade II	Positive histology	8210/3: Adenocarcinoma in adenomatous polyp	Distant	T3	N0	M1	10	0	40	16	0	One primary only	40	No radiation and/or cancer-directed surgery	None/Unknown	Yes	Systemic therapy after surgery	Alive or dead of other cause	Alive or dead due to cancer	102	Alive
1166674	Divorced	White	54	Male	2010	Splenic Flexure	Moderately differentiated; Grade II	Positive histology	8263/3: Adenocarcinoma in tubulovillous adenoma	Localized	T1	N0	M0	20	0	20	14	99	One primary only	40	No radiation and/or cancer-directed surgery	None/Unknown	No/Unknown	No systemic therapy and/or surgical procedures	Alive or dead of other cause	Alive or dead due to cancer	103	Alive
1166695	Married (including common law)	White	84	Male	2010	Transverse Colon	Moderately differentiated; Grade II	Positive histology	8140/3: Adenocarcinoma, NOS	Localized	T3	N0	M0	10	999	45	9	0	One primary only	40	No radiation and/or cancer-directed surgery	None/Unknown	No/Unknown	No systemic therapy and/or surgical procedures	Alive or dead of other cause	Dead (attributable to causes other than this cancer dx)	0	Dead
1166719	Married (including common law)	White	39	Female	2010	Rectosigmoid Junction	Moderately differentiated; Grade II	Positive histology	8140/3: Adenocarcinoma, NOS	Regional	T4	N0	M0	10	0	60	26	0	One primary only	31	Radiation after surgery	Beam radiation	Yes	Systemic therapy after surgery	Alive or dead of other cause	Alive or dead due to cancer	101	Alive
1166814	Married (including common law)	White	84	Female	2010	Transverse Colon	Moderately differentiated; Grade II	Positive histology	8140/3: Adenocarcinoma, NOS	Localized	T3	N0	M0	20	0	80	24	0	One primary only	30	No radiation and/or cancer-directed surgery	None/Unknown	No/Unknown	No systemic therapy and/or surgical procedures	Alive or dead of other cause	Alive or dead due to cancer	100	Alive
1167016	Married (including common law)	White	62	Male	2010	Sigmoid Colon	Moderately differentiated; Grade II	Positive histology	8140/3: Adenocarcinoma, NOS	Localized	T3	N0	M0	20	0	42	25	0	One primary only	30	No radiation and/or cancer-directed surgery	None/Unknown	No/Unknown	No systemic therapy and/or surgical procedures	Dead (missing/unknown COD)	Dead (missing/unknown COD)	26	Dead
1167021	Married (including common law)	White	64	Female	2010	Ascending Colon	Well differentiated; Grade I	Positive histology	8210/3: Adenocarcinoma in adenomatous polyp	Localized	T1	N0	M0	20	998	999	0	98	One primary only	28	No radiation and/or cancer-directed surgery	None/Unknown	No/Unknown	No systemic therapy and/or surgical procedures	Alive or dead of other cause	Alive or dead due to cancer	76	Alive
1167024	Single (never married)	White	62	Male	2010	Sigmoid Colon	Moderately differentiated; Grade II	Positive histology	8140/3: Adenocarcinoma, NOS	Distant	T4	N2	M1	10	999	46	8	8	One primary only	30	No radiation and/or cancer-directed surgery	None/Unknown	Yes	Systemic therapy after surgery	Dead (attributable to this cancer dx)	Alive or dead due to cancer	17	Dead
1167053	Married (including common law)	White	56	Male	2010	Transverse Colon	Moderately differentiated; Grade II	Positive histology	8140/3: Adenocarcinoma, NOS	Regional	T3	N2	M0	20	0	40	25	24	One primary only	40	No radiation and/or cancer-directed surgery	None/Unknown	No/Unknown	No systemic therapy and/or surgical procedures	Alive or dead of other cause	Alive or dead due to cancer	101	Alive
1167057	Married (including common law)	White	58	Male	2010	Rectum	Moderately differentiated; Grade II	Positive histology	8210/3: Adenocarcinoma in adenomatous polyp	Localized	T2	N0	M0	20	0	999	3	0	One primary only	50	No radiation and/or cancer-directed surgery	None/Unknown	No/Unknown	No systemic therapy and/or surgical procedures	Alive or dead of other cause	Alive or dead due to cancer	106	Alive
1167133	Married (including common law)	White	71	Male	2010	Rectum	Moderately differentiated; Grade II	Positive histology	8140/3: Adenocarcinoma, NOS	Localized	T3	N0	M0	998	0	28	4	0	One primary only	30	Radiation prior to surgery	Beam radiation	Yes	Systemic therapy before surgery	Alive or dead of other cause	Dead (attributable to causes other than this cancer dx)	83	Dead
1167139	Widowed	White	78	Male	2010	Rectum	Well differentiated; Grade I	Positive histology	8210/3: Adenocarcinoma in adenomatous polyp	Localized	T1	N0	M0	20	0	3	0	98	One primary only	26	No radiation and/or cancer-directed surgery	None/Unknown	No/Unknown	No systemic therapy and/or surgical procedures	Alive or dead of other cause	Alive or dead due to cancer	103	Alive
1167168	Single (never married)	White	57	Female	2010	Sigmoid Colon	Poorly differentiated; Grade III	Positive histology	8140/3: Adenocarcinoma, NOS	Regional	T3	N0	M0	10	0	40	7	0	One primary only	30	No radiation and/or cancer-directed surgery	None/Unknown	Yes	Systemic therapy after surgery	Alive or dead of other cause	Alive or dead due to cancer	102	Alive
1167180	Married (including common law)	White	63	Female	2010	Ascending Colon	Poorly differentiated; Grade III	Positive histology	8140/3: Adenocarcinoma, NOS	Localized	T2	N0	M0	20	0	26	30	0	One primary only	40	No radiation and/or cancer-directed surgery	None/Unknown	No/Unknown	No systemic therapy and/or surgical procedures	Alive or dead of other cause	Alive or dead due to cancer	102	Alive
1167194	Married (including common law)	White	33	Female	2010	Descending Colon	Poorly differentiated; Grade III	Positive histology	8140/3: Adenocarcinoma, NOS	Localized	T3	N0	M0	10	0	115	29	0	One primary only	40	No radiation and/or cancer-directed surgery	None/Unknown	Yes	Systemic therapy after surgery	Alive or dead of other cause	Alive or dead due to cancer	102	Alive
1167330	Married (including common law)	White	85	Male	2010	Cecum	Moderately differentiated; Grade II	Positive histology	8140/3: Adenocarcinoma, NOS	Localized	T2	N0	M0	10	0	29	20	0	One primary only	40	No radiation and/or cancer-directed surgery	None/Unknown	No/Unknown	No systemic therapy and/or surgical procedures	Dead (attributable to this cancer dx)	Alive or dead due to cancer	22	Dead
1167332	Widowed	White	73	Female	2010	Cecum	Poorly differentiated; Grade III	Positive histology	8140/3: Adenocarcinoma, NOS	Localized	T3	N0	M0	20	0	66	25	0	One primary only	40	No radiation and/or cancer-directed surgery	None/Unknown	No/Unknown	No systemic therapy and/or surgical procedures	Alive or dead of other cause	Alive or dead due to cancer	106	Alive
1167335	Married (including common law)	White	79	Male	2010	Sigmoid Colon	Poorly differentiated; Grade III	Positive histology	8140/3: Adenocarcinoma, NOS	Regional	T3	N2	M0	20	0	65	25	4	One primary only	32	No radiation and/or cancer-directed surgery	None/Unknown	Yes	Systemic therapy after surgery	Dead (attributable to this cancer dx)	Alive or dead due to cancer	81	Dead
1167338	Married (including common law)	White	71	Female	2010	Ascending Colon	Moderately differentiated; Grade II	Positive histology	8140/3: Adenocarcinoma, NOS	Regional	T1	N2	M0	20	0	10	21	6	One primary only	40	No radiation and/or cancer-directed surgery	None/Unknown	Yes	Systemic therapy after surgery	Dead (attributable to this cancer dx)	Alive or dead due to cancer	58	Dead
1167355	Single (never married)	White	51	Male	2010	Sigmoid Colon	Moderately differentiated; Grade II	Positive histology	8210/3: Adenocarcinoma in adenomatous polyp	Localized	T1	N0	M0	20	0	999	10	0	One primary only	30	No radiation and/or cancer-directed surgery	None/Unknown	No/Unknown	No systemic therapy and/or surgical procedures	Alive or dead of other cause	Alive or dead due to cancer	101	Alive
1167363	Widowed	White	80	Female	2010	Ascending Colon	Moderately differentiated; Grade II	Positive histology	8140/3: Adenocarcinoma, NOS	Localized	T3	N0	M0	10	0	50	15	0	One primary only	40	No radiation and/or cancer-directed surgery	None/Unknown	No/Unknown	No systemic therapy and/or surgical procedures	Alive or dead of other cause	Dead (attributable to causes other than this cancer dx)	68	Dead
1167365	Married (including common law)	White	52	Female	2010	Sigmoid Colon	Moderately differentiated; Grade II	Positive histology	8140/3: Adenocarcinoma, NOS	Regional	T3	N1	M0	20	999	30	6	1	One primary only	30	No radiation and/or cancer-directed surgery	None/Unknown	Yes	Systemic therapy after surgery	Alive or dead of other cause	Alive or dead due to cancer	96	Alive
1167367	Married (including common law)	White	77	Male	2010	Transverse Colon	Moderately differentiated; Grade II	Positive histology	8481/3: Mucin-producing adenocarcinoma	Regional	T3	N1	M0	20	0	40	12	3	One primary only	41	No radiation and/or cancer-directed surgery	None/Unknown	No/Unknown	No systemic therapy and/or surgical procedures	Dead (attributable to this cancer dx)	Alive or dead due to cancer	14	Dead
1167371	Divorced	Other (American Indian/AK Native, Asian/Pacific Islander)	63	Female	2010	Sigmoid Colon	Moderately differentiated; Grade II	Positive histology	8140/3: Adenocarcinoma, NOS	Distant	T4	N2	M1	10	1	40	11	5	One primary only	30	No radiation and/or cancer-directed surgery	None/Unknown	Yes	Systemic therapy after surgery	Dead (missing/unknown COD)	Dead (missing/unknown COD)	9	Dead
1167374	Unknown	White	66	Female	2010	Sigmoid Colon	Moderately differentiated; Grade II	Positive histology	8480/3: Mucinous adenocarcinoma	Localized	T3	N0	M0	20	0	60	26	0	One primary only	30	No radiation and/or cancer-directed surgery	None/Unknown	No/Unknown	No systemic therapy and/or surgical procedures	Dead (attributable to this cancer dx)	Alive or dead due to cancer	43	Dead
1167386	Married (including common law)	White	67	Female	2010	Cecum	Well differentiated; Grade I	Positive histology	8140/3: Adenocarcinoma, NOS	Regional	T3	N0	M0	20	999	35	22	0	One primary only	40	No radiation and/or cancer-directed surgery	None/Unknown	No/Unknown	No systemic therapy and/or surgical procedures	Alive or dead of other cause	Alive or dead due to cancer	107	Alive
1167388	Single (never married)	White	44	Male	2010	Splenic Flexure	Moderately differentiated; Grade II	Positive histology	8140/3: Adenocarcinoma, NOS	Localized	T3	N0	M0	20	0	110	44	0	One primary only	32	No radiation and/or cancer-directed surgery	None/Unknown	Yes	Systemic therapy after surgery	Alive or dead of other cause	Alive or dead due to cancer	102	Alive
1167391	Married (including common law)	White	69	Female	2010	Ascending Colon	Moderately differentiated; Grade II	Positive histology	8263/3: Adenocarcinoma in tubulovillous adenoma	Localized	T1	N0	M0	10	0	40	27	0	One primary only	40	No radiation and/or cancer-directed surgery	None/Unknown	No/Unknown	No systemic therapy and/or surgical procedures	Alive or dead of other cause	Alive or dead due to cancer	73	Alive
1167399	Widowed	White	66	Male	2010	Rectum	Moderately differentiated; Grade II	Positive histology	8140/3: Adenocarcinoma, NOS	Regional	T3	N0	M0	20	999	35	12	0	One primary only	30	No radiation and/or cancer-directed surgery	None/Unknown	No/Unknown	No systemic therapy and/or surgical procedures	Alive or dead of other cause	Alive or dead due to cancer	107	Alive
1167402	Divorced	Black	85	Female	2010	Rectum	Moderately differentiated; Grade II	Positive histology	8140/3: Adenocarcinoma, NOS	Localized	T1	N0	M0	20	999	50	0	98	One primary only	0	No radiation and/or cancer-directed surgery	None/Unknown	No/Unknown	No systemic therapy and/or surgical procedures	Dead (attributable to this cancer dx)	Alive or dead due to cancer	37	Dead
1167458	Married (including common law)	Other (American Indian/AK Native, Asian/Pacific Islander)	54	Male	2010	Descending Colon	Undifferentiated; anaplastic; Grade IV	Positive histology	8210/3: Adenocarcinoma in adenomatous polyp	Localized	T1	N0	M0	10	999	999	10	0	One primary only	30	No radiation and/or cancer-directed surgery	None/Unknown	No/Unknown	No systemic therapy and/or surgical procedures	Alive or dead of other cause	Alive or dead due to cancer	106	Alive
1167481	Widowed	Other (American Indian/AK Native, Asian/Pacific Islander)	80	Female	2010	Ascending Colon	Moderately differentiated; Grade II	Positive histology	8140/3: Adenocarcinoma, NOS	Localized	T1	N0	M0	998	0	23	6	0	One primary only	40	No radiation and/or cancer-directed surgery	None/Unknown	No/Unknown	No systemic therapy and/or surgical procedures	Alive or dead of other cause	Dead (attributable to causes other than this cancer dx)	8	Dead
1167483	Married (including common law)	White	73	Male	2010	Splenic Flexure	Moderately differentiated; Grade II	Positive histology	8140/3: Adenocarcinoma, NOS	Localized	T3	N0	M0	10	0	80	14	0	One primary only	40	No radiation and/or cancer-directed surgery	None/Unknown	No/Unknown	No systemic therapy and/or surgical procedures	Alive or dead of other cause	Alive or dead due to cancer	100	Alive
1167537	Married (including common law)	White	62	Female	2010	Rectum	Moderately differentiated; Grade II	Positive histology	8140/3: Adenocarcinoma, NOS	Regional	T3	N1	M0	20	0	31	43	2	One primary only	30	No radiation and/or cancer-directed surgery	None/Unknown	Yes	Systemic therapy after surgery	Alive or dead of other cause	Alive or dead due to cancer	101	Alive
1167564	Married (including common law)	White	73	Female	2010	Sigmoid Colon	Moderately differentiated; Grade II	Positive histology	8210/3: Adenocarcinoma in adenomatous polyp	Localized	T1	N0	M0	998	999	15	0	98	One primary only	28	No radiation and/or cancer-directed surgery	None/Unknown	No/Unknown	No systemic therapy and/or surgical procedures	Alive or dead of other cause	Dead (attributable to causes other than this cancer dx)	78	Dead
1167613	Married (including common law)	Other (American Indian/AK Native, Asian/Pacific Islander)	74	Female	2010	Ascending Colon	Moderately differentiated; Grade II	Positive histology	8140/3: Adenocarcinoma, NOS	Distant	T3	N2	M1	20	0	45	16	7	One primary only	40	No radiation and/or cancer-directed surgery	None/Unknown	Yes	Systemic therapy after surgery	Dead (attributable to this cancer dx)	Alive or dead due to cancer	22	Dead
1167631	Single (never married)	White	79	Male	2010	Rectum	Moderately differentiated; Grade II	Positive histology	8140/3: Adenocarcinoma, NOS	Localized	T3	N0	M0	998	999	119	0	98	One primary only	0	No radiation and/or cancer-directed surgery	Beam radiation	No/Unknown	No systemic therapy and/or surgical procedures	Dead (attributable to this cancer dx)	Alive or dead due to cancer	13	Dead
1167637	Married (including common law)	White	84	Female	2010	Ascending Colon	Moderately differentiated; Grade II	Positive histology	8140/3: Adenocarcinoma, NOS	Distant	T1	N0	M1	10	0	999	0	98	One primary only	0	No radiation and/or cancer-directed surgery	None/Unknown	No/Unknown	No systemic therapy and/or surgical procedures	Dead (attributable to this cancer dx)	Alive or dead due to cancer	0	Dead
1167858	Married (including common law)	White	54	Male	2010	Sigmoid Colon	Moderately differentiated; Grade II	Positive histology	8140/3: Adenocarcinoma, NOS	Distant	T3	N2	M1	10	999	45	25	21	One primary only	30	No radiation and/or cancer-directed surgery	None/Unknown	Yes	Systemic therapy after surgery	Dead (attributable to this cancer dx)	Alive or dead due to cancer	47	Dead
1167882	Divorced	White	85	Female	2010	Cecum	Poorly differentiated; Grade III	Positive histology	8255/3: Adenocarcinoma with mixed subtypes	Regional	T4	N1	M0	998	999	70	14	1	One primary only	40	No radiation and/or cancer-directed surgery	None/Unknown	No/Unknown	No systemic therapy and/or surgical procedures	Dead (attributable to this cancer dx)	Alive or dead due to cancer	25	Dead
1167924	Divorced	White	55	Male	2010	Rectum	Moderately differentiated; Grade II	Positive histology	8140/3: Adenocarcinoma, NOS	Localized	T3	N0	M0	999	0	999	15	0	One primary only	30	Radiation after surgery	Beam radiation	Yes	Systemic therapy after surgery	Alive or dead of other cause	Alive or dead due to cancer	106	Alive
1167930	Divorced	White	62	Male	2010	Cecum	Moderately differentiated; Grade II	Positive histology	8140/3: Adenocarcinoma, NOS	Regional	T3	N1	M0	998	0	30	13	2	One primary only	40	No radiation and/or cancer-directed surgery	None/Unknown	Yes	Systemic therapy after surgery	Alive or dead of other cause	Dead (attributable to causes other than this cancer dx)	94	Dead
1167941	Single (never married)	White	57	Male	2010	Rectum	Moderately differentiated; Grade II	Positive histology	8140/3: Adenocarcinoma, NOS	Regional	T3	N0	M0	10	0	60	37	0	One primary only	30	Radiation after surgery	Beam radiation	Yes	Systemic therapy after surgery	Alive or dead of other cause	Alive or dead due to cancer	99	Alive
1167945	Married (including common law)	Unknown	67	Female	2010	Rectum	Moderately differentiated; Grade II	Positive histology	8140/3: Adenocarcinoma, NOS	Localized	T3	N0	M0	20	0	30	10	0	One primary only	30	No radiation and/or cancer-directed surgery	None/Unknown	No/Unknown	No systemic therapy and/or surgical procedures	Alive or dead of other cause	Alive or dead due to cancer	105	Alive
1167976	Married (including common law)	White	85	Male	2010	Rectum	Moderately differentiated; Grade II	Positive histology	8140/3: Adenocarcinoma, NOS	Regional	T3	N1	M0	10	998	999	0	98	One primary only	0	No radiation and/or cancer-directed surgery	Beam radiation	Yes	No systemic therapy and/or surgical procedures	Dead (attributable to this cancer dx)	Alive or dead due to cancer	3	Dead
1167984	Married (including common law)	Other (American Indian/AK Native, Asian/Pacific Islander)	71	Male	2010	Rectum	Moderately differentiated; Grade II	Positive histology	8140/3: Adenocarcinoma, NOS	Regional	T3	N0	M0	10	0	25	0	98	One primary only	50	Radiation prior to surgery	Beam radiation	Yes	Systemic therapy both before and after surgery	Dead (missing/unknown COD)	Dead (missing/unknown COD)	78	Dead
1167987	Married (including common law)	White	67	Male	2010	Rectum	Moderately differentiated; Grade II	Positive histology	8140/3: Adenocarcinoma, NOS	Regional	T3	N1	M0	999	0	50	9	2	One primary only	30	Radiation prior to surgery	Beam radiation	Yes	Systemic therapy after surgery	Alive or dead of other cause	Dead (attributable to causes other than this cancer dx)	75	Dead
1167995	Widowed	Other (American Indian/AK Native, Asian/Pacific Islander)	83	Female	2010	Rectum	Moderately differentiated; Grade II	Positive histology	8480/3: Mucinous adenocarcinoma	Regional	T3	N1	M0	999	0	999	14	0	One primary only	30	Radiation prior to surgery	Radiation, NOS method or source not specified	Yes	Systemic therapy before surgery	Dead (missing/unknown COD)	Dead (missing/unknown COD)	56	Dead
1168006	Widowed	White	81	Female	2010	Ascending Colon	Moderately differentiated; Grade II	Positive histology	8140/3: Adenocarcinoma, NOS	Localized	T2	N0	M0	998	0	68	18	0	One primary only	70	No radiation and/or cancer-directed surgery	None/Unknown	No/Unknown	No systemic therapy and/or surgical procedures	Alive or dead of other cause	Alive or dead due to cancer	101	Alive
1168007	Widowed	White	71	Male	2010	Splenic Flexure	Moderately differentiated; Grade II	Positive histology	8140/3: Adenocarcinoma, NOS	Localized	T2	N0	M0	20	0	10	12	0	One primary only	30	No radiation and/or cancer-directed surgery	None/Unknown	No/Unknown	No systemic therapy and/or surgical procedures	Alive or dead of other cause	Alive or dead due to cancer	101	Alive
1168027	Divorced	Other (American Indian/AK Native, Asian/Pacific Islander)	45	Male	2010	Sigmoid Colon	Moderately differentiated; Grade II	Positive histology	8140/3: Adenocarcinoma, NOS	Regional	T3	N1	M0	20	0	65	24	1	One primary only	30	No radiation and/or cancer-directed surgery	None/Unknown	No/Unknown	No systemic therapy and/or surgical procedures	Alive or dead of other cause	Alive or dead due to cancer	105	Alive
1168056	Widowed	White	85	Female	2010	Ascending Colon	Poorly differentiated; Grade III	Positive histology	8140/3: Adenocarcinoma, NOS	Localized	T3	N0	M0	20	0	45	28	0	One primary only	40	No radiation and/or cancer-directed surgery	None/Unknown	No/Unknown	No systemic therapy and/or surgical procedures	Alive or dead of other cause	Dead (attributable to causes other than this cancer dx)	96	Dead
1168101	Married (including common law)	White	76	Female	2010	Ascending Colon	Poorly differentiated; Grade III	Positive histology	8140/3: Adenocarcinoma, NOS	Regional	T3	N1	M0	20	0	80	20	1	One primary only	30	No radiation and/or cancer-directed surgery	None/Unknown	Yes	Systemic therapy after surgery	Dead (attributable to this cancer dx)	Alive or dead due to cancer	21	Dead
1168137	Widowed	Other (American Indian/AK Native, Asian/Pacific Islander)	85	Female	2010	Sigmoid Colon	Moderately differentiated; Grade II	Positive histology	8140/3: Adenocarcinoma, NOS	Regional	T3	N1	M0	10	0	20	4	1	One primary only	30	No radiation and/or cancer-directed surgery	None/Unknown	No/Unknown	No systemic therapy and/or surgical procedures	Dead (attributable to this cancer dx)	Alive or dead due to cancer	22	Dead
1168142	Single (never married)	Other (American Indian/AK Native, Asian/Pacific Islander)	85	Female	2010	Transverse Colon	Poorly differentiated; Grade III	Positive histology	8140/3: Adenocarcinoma, NOS	Regional	T3	N0	M0	10	0	35	18	0	One primary only	40	No radiation and/or cancer-directed surgery	None/Unknown	No/Unknown	No systemic therapy and/or surgical procedures	Alive or dead of other cause	Dead (attributable to causes other than this cancer dx)	34	Dead
1168151	Married (including common law)	Other (American Indian/AK Native, Asian/Pacific Islander)	85	Female	2010	Transverse Colon	Moderately differentiated; Grade II	Positive histology	8140/3: Adenocarcinoma, NOS	Localized	T2	N0	M0	998	0	34	9	0	One primary only	30	No radiation and/or cancer-directed surgery	None/Unknown	No/Unknown	No systemic therapy and/or surgical procedures	Alive or dead of other cause	Dead (attributable to causes other than this cancer dx)	55	Dead
1168217	Married (including common law)	Black	69	Male	2010	Sigmoid Colon	Poorly differentiated; Grade III	Positive histology	8140/3: Adenocarcinoma, NOS	Distant	T4	N2	M1	20	1	45	17	4	One primary only	30	No radiation and/or cancer-directed surgery	None/Unknown	Yes	Systemic therapy after surgery	Alive or dead of other cause	Alive or dead due to cancer	72	Alive
1168221	Married (including common law)	White	61	Male	2010	Sigmoid Colon	Moderately differentiated; Grade II	Positive histology	8140/3: Adenocarcinoma, NOS	Localized	T2	N0	M0	999	0	35	15	0	One primary only	30	No radiation and/or cancer-directed surgery	None/Unknown	No/Unknown	No systemic therapy and/or surgical procedures	Alive or dead of other cause	Alive or dead due to cancer	84	Alive
1168257	Married (including common law)	Other (American Indian/AK Native, Asian/Pacific Islander)	52	Female	2010	Sigmoid Colon	Moderately differentiated; Grade II	Positive histology	8140/3: Adenocarcinoma, NOS	Distant	T3	N0	M1	998	0	105	23	0	One primary only	30	No radiation and/or cancer-directed surgery	None/Unknown	Yes	Systemic therapy after surgery	Alive or dead of other cause	Alive or dead due to cancer	11	Alive
1168258	Divorced	White	64	Female	2010	Sigmoid Colon	Moderately differentiated; Grade II	Positive histology	8140/3: Adenocarcinoma, NOS	Regional	T3	N1	M0	997	0	42	33	1	One primary only	30	No radiation and/or cancer-directed surgery	None/Unknown	No/Unknown	No systemic therapy and/or surgical procedures	Alive or dead of other cause	Alive or dead due to cancer	96	Alive
1168375	Widowed	White	85	Female	2010	Transverse Colon	Moderately differentiated; Grade II	Positive histology	8140/3: Adenocarcinoma, NOS	Regional	T4	N0	M0	20	990	30	17	0	One primary only	40	No radiation and/or cancer-directed surgery	None/Unknown	No/Unknown	No systemic therapy and/or surgical procedures	Alive or dead of other cause	Alive or dead due to cancer	105	Alive
1168378	Single (never married)	Other (American Indian/AK Native, Asian/Pacific Islander)	58	Female	2010	Sigmoid Colon	Moderately differentiated; Grade II	Positive histology	8140/3: Adenocarcinoma, NOS	Regional	T3	N1	M0	998	999	20	10	1	One primary only	40	No radiation and/or cancer-directed surgery	None/Unknown	Yes	Systemic therapy after surgery	Alive or dead of other cause	Alive or dead due to cancer	102	Alive
1168381	Married (including common law)	Other (American Indian/AK Native, Asian/Pacific Islander)	66	Male	2010	Splenic Flexure	Moderately differentiated; Grade II	Positive histology	8140/3: Adenocarcinoma, NOS	Localized	T2	N0	M0	998	999	19	7	0	One primary only	30	No radiation and/or cancer-directed surgery	None/Unknown	No/Unknown	No systemic therapy and/or surgical procedures	Alive or dead of other cause	Alive or dead due to cancer	106	Alive
1168408	Married (including common law)	White	49	Male	2010	Rectum	Moderately differentiated; Grade II	Positive histology	8140/3: Adenocarcinoma, NOS	Localized	T1	N0	M0	999	0	8	0	98	One primary only	27	No radiation and/or cancer-directed surgery	None/Unknown	No/Unknown	No systemic therapy and/or surgical procedures	Alive or dead of other cause	Alive or dead due to cancer	105	Alive
1168420	Married (including common law)	White	64	Male	2010	Transverse Colon	Poorly differentiated; Grade III	Positive histology	8140/3: Adenocarcinoma, NOS	Regional	T3	N2	M0	999	0	60	51	9	One primary only	40	No radiation and/or cancer-directed surgery	None/Unknown	Yes	Systemic therapy after surgery	Alive or dead of other cause	Alive or dead due to cancer	103	Alive
1168498	Widowed	White	80	Female	2010	Rectosigmoid Junction	Moderately differentiated; Grade II	Positive histology	8140/3: Adenocarcinoma, NOS	Regional	T3	N1	M0	999	0	60	5	1	One primary only	30	No radiation and/or cancer-directed surgery	None/Unknown	No/Unknown	No systemic therapy and/or surgical procedures	Dead (attributable to this cancer dx)	Alive or dead due to cancer	13	Dead
1168514	Married (including common law)	White	84	Male	2010	Cecum	Moderately differentiated; Grade II	Positive histology	8140/3: Adenocarcinoma, NOS	Regional	T3	N2	M0	10	0	60	25	5	One primary only	40	No radiation and/or cancer-directed surgery	None/Unknown	Yes	Systemic therapy after surgery	Dead (attributable to this cancer dx)	Alive or dead due to cancer	19	Dead
1168537	Married (including common law)	Other (American Indian/AK Native, Asian/Pacific Islander)	71	Female	2010	Rectum	Well differentiated; Grade I	Positive histology	8263/3: Adenocarcinoma in tubulovillous adenoma	Localized	T1	N0	M0	998	0	60	3	0	One primary only	50	No radiation and/or cancer-directed surgery	None/Unknown	No/Unknown	No systemic therapy and/or surgical procedures	Alive or dead of other cause	Alive or dead due to cancer	99	Alive
1168578	Married (including common law)	White	59	Female	2010	Transverse Colon	Moderately differentiated; Grade II	Positive histology	8140/3: Adenocarcinoma, NOS	Regional	T4	N2	M0	20	0	43	15	4	One primary only	30	No radiation and/or cancer-directed surgery	None/Unknown	Yes	Systemic therapy after surgery	Dead (attributable to this cancer dx)	Alive or dead due to cancer	48	Dead
1168587	Married (including common law)	White	83	Male	2010	Transverse Colon	Moderately differentiated; Grade II	Positive histology	8140/3: Adenocarcinoma, NOS	Localized	T3	N0	M0	10	0	45	4	0	One primary only	40	No radiation and/or cancer-directed surgery	None/Unknown	No/Unknown	No systemic therapy and/or surgical procedures	Alive or dead of other cause	Dead (attributable to causes other than this cancer dx)	31	Dead
1168599	Married (including common law)	White	59	Female	2010	Sigmoid Colon	Poorly differentiated; Grade III	Positive histology	8140/3: Adenocarcinoma, NOS	Regional	T2	N1	M0	20	0	20	9	2	One primary only	30	No radiation and/or cancer-directed surgery	None/Unknown	Yes	Systemic therapy after surgery	Alive or dead of other cause	Alive or dead due to cancer	101	Alive
1168648	Divorced	Black	60	Male	2010	Sigmoid Colon	Moderately differentiated; Grade II	Positive histology	8140/3: Adenocarcinoma, NOS	Distant	T4	N1	M1	998	0	60	24	3	One primary only	30	No radiation and/or cancer-directed surgery	None/Unknown	Yes	Systemic therapy after surgery	Dead (attributable to this cancer dx)	Alive or dead due to cancer	15	Dead
1168650	Widowed	White	85	Female	2010	Sigmoid Colon	Well differentiated; Grade I	Positive histology	8263/3: Adenocarcinoma in tubulovillous adenoma	Localized	T1	N0	M0	20	0	17	0	98	One primary only	0	No radiation and/or cancer-directed surgery	None/Unknown	No/Unknown	No systemic therapy and/or surgical procedures	Alive or dead of other cause	Dead (attributable to causes other than this cancer dx)	4	Dead
1168696	Married (including common law)	White	78	Male	2010	Ascending Colon	Moderately differentiated; Grade II	Positive histology	8480/3: Mucinous adenocarcinoma	Localized	T2	N0	M0	20	0	30	6	0	One primary only	30	No radiation and/or cancer-directed surgery	None/Unknown	No/Unknown	No systemic therapy and/or surgical procedures	Alive or dead of other cause	Alive or dead due to cancer	99	Alive
1168757	Married (including common law)	Unknown	56	Female	2010	Ascending Colon	Moderately differentiated; Grade II	Positive histology	8263/3: Adenocarcinoma in tubulovillous adenoma	Localized	T1	N0	M0	998	0	12	0	98	One primary only	28	No radiation and/or cancer-directed surgery	None/Unknown	No/Unknown	No systemic therapy and/or surgical procedures	Alive or dead of other cause	Alive or dead due to cancer	92	Alive
1168761	Married (including common law)	White	84	Male	2010	Cecum	Poorly differentiated; Grade III	Positive histology	8263/3: Adenocarcinoma in tubulovillous adenoma	Localized	T1	N0	M0	10	0	75	17	0	One primary only	40	No radiation and/or cancer-directed surgery	None/Unknown	No/Unknown	No systemic therapy and/or surgical procedures	Alive or dead of other cause	Dead (attributable to causes other than this cancer dx)	73	Dead
1168775	Married (including common law)	Other (American Indian/AK Native, Asian/Pacific Islander)	44	Male	2010	Descending Colon	Moderately differentiated; Grade II	Positive histology	8140/3: Adenocarcinoma, NOS	Distant	T3	N2	M1	10	999	15	18	9	One primary only	30	No radiation and/or cancer-directed surgery	None/Unknown	Yes	Systemic therapy after surgery	Dead (attributable to this cancer dx)	Alive or dead due to cancer	15	Dead
1168779	Married (including common law)	Black	54	Male	2010	Ascending Colon	Well differentiated; Grade I	Positive histology	8263/3: Adenocarcinoma in tubulovillous adenoma	Localized	T1	N0	M0	20	0	12	10	0	One primary only	40	No radiation and/or cancer-directed surgery	None/Unknown	No/Unknown	No systemic therapy and/or surgical procedures	Alive or dead of other cause	Alive or dead due to cancer	106	Alive
1168935	Married (including common law)	White	46	Male	2010	Rectosigmoid Junction	Moderately differentiated; Grade II	Positive histology	8480/3: Mucinous adenocarcinoma	Regional	T3	N1	M0	20	0	25	5	0	One primary only	30	Radiation prior to surgery	Beam radiation	Yes	Systemic therapy both before and after surgery	Alive or dead of other cause	Alive or dead due to cancer	99	Alive
1168982	Married (including common law)	Other (American Indian/AK Native, Asian/Pacific Islander)	60	Female	2010	Rectum	Moderately differentiated; Grade II	Positive histology	8140/3: Adenocarcinoma, NOS	Localized	T3	N0	M0	10	0	42	0	98	One primary only	30	Radiation after surgery	Beam radiation	Yes	Systemic therapy after surgery	Dead (attributable to this cancer dx)	Alive or dead due to cancer	64	Dead
1168998	Single (never married)	Unknown	74	Male	2010	Cecum	Poorly differentiated; Grade III	Positive histology	8140/3: Adenocarcinoma, NOS	Regional	T1	N1	M0	10	0	38	15	1	One primary only	30	No radiation and/or cancer-directed surgery	None/Unknown	No/Unknown	No systemic therapy and/or surgical procedures	Alive or dead of other cause	Alive or dead due to cancer	99	Alive
1169007	Married (including common law)	White	72	Male	2010	Rectum	Poorly differentiated; Grade III	Positive histology	8210/3: Adenocarcinoma in adenomatous polyp	Regional	T3	N0	M0	20	0	44	6	0	One primary only	30	Radiation prior to surgery	Beam radiation	Yes	Systemic therapy before surgery	Alive or dead of other cause	Alive or dead due to cancer	99	Alive
1169095	Single (never married)	Other (American Indian/AK Native, Asian/Pacific Islander)	85	Male	2010	Cecum	Poorly differentiated; Grade III	Positive histology	8140/3: Adenocarcinoma, NOS	Localized	T2	N0	M0	10	0	30	13	0	One primary only	40	No radiation and/or cancer-directed surgery	None/Unknown	No/Unknown	No systemic therapy and/or surgical procedures	Alive or dead of other cause	Dead (attributable to causes other than this cancer dx)	10	Dead
1169101	Divorced	White	81	Female	2010	Cecum	Moderately differentiated; Grade II	Positive histology	8140/3: Adenocarcinoma, NOS	Regional	T3	N1	M0	10	0	30	12	3	One primary only	40	No radiation and/or cancer-directed surgery	None/Unknown	Yes	Systemic therapy after surgery	Dead (attributable to this cancer dx)	Alive or dead due to cancer	18	Dead
1169219	Married (including common law)	White	49	Male	2010	Cecum	Moderately differentiated; Grade II	Positive histology	8140/3: Adenocarcinoma, NOS	Regional	T3	N0	M0	20	0	100	16	0	One primary only	30	No radiation and/or cancer-directed surgery	None/Unknown	No/Unknown	No systemic therapy and/or surgical procedures	Alive or dead of other cause	Alive or dead due to cancer	100	Alive
1169271	Married (including common law)	Other (American Indian/AK Native, Asian/Pacific Islander)	51	Female	2010	Sigmoid Colon	Moderately differentiated; Grade II	Positive histology	8140/3: Adenocarcinoma, NOS	Localized	T2	N0	M0	20	0	23	15	0	One primary only	30	No radiation and/or cancer-directed surgery	None/Unknown	No/Unknown	No systemic therapy and/or surgical procedures	Alive or dead of other cause	Alive or dead due to cancer	101	Alive
1169274	Married (including common law)	Other (American Indian/AK Native, Asian/Pacific Islander)	45	Female	2010	Transverse Colon	Moderately differentiated; Grade II	Positive histology	8140/3: Adenocarcinoma, NOS	Localized	T3	N0	M0	20	0	33	30	0	One primary only	41	No radiation and/or cancer-directed surgery	None/Unknown	No/Unknown	No systemic therapy and/or surgical procedures	Alive or dead of other cause	Alive or dead due to cancer	95	Alive
1169284	Married (including common law)	White	55	Male	2010	Rectum	Moderately differentiated; Grade II	Positive histology	8140/3: Adenocarcinoma, NOS	Localized	T3	N0	M0	998	0	90	31	0	One primary only	30	No radiation and/or cancer-directed surgery	None/Unknown	No/Unknown	No systemic therapy and/or surgical procedures	Alive or dead of other cause	Alive or dead due to cancer	99	Alive
1169337	Single (never married)	White	71	Female	2010	Descending Colon	Well differentiated; Grade I	Positive histology	8140/3: Adenocarcinoma, NOS	Localized	T3	N0	M0	20	0	62	18	0	One primary only	30	No radiation and/or cancer-directed surgery	None/Unknown	No/Unknown	No systemic therapy and/or surgical procedures	Alive or dead of other cause	Alive or dead due to cancer	102	Alive
1169401	Married (including common law)	White	64	Female	2010	Cecum	Moderately differentiated; Grade II	Positive histology	8140/3: Adenocarcinoma, NOS	Regional	T3	N1	M0	999	0	35	19	1	One primary only	40	No radiation and/or cancer-directed surgery	None/Unknown	Yes	Systemic therapy after surgery	Alive or dead of other cause	Alive or dead due to cancer	101	Alive
1169419	Single (never married)	White	27	Male	2010	Rectosigmoid Junction	Moderately differentiated; Grade II	Positive histology	8140/3: Adenocarcinoma, NOS	Regional	T3	N1	M0	20	3	50	28	3	One primary only	30	Radiation after surgery	Beam radiation	Yes	Systemic therapy after surgery	Dead (attributable to this cancer dx)	Alive or dead due to cancer	75	Dead
1169787	Single (never married)	Other (American Indian/AK Native, Asian/Pacific Islander)	75	Female	2010	Rectum	Moderately differentiated; Grade II	Positive histology	8140/3: Adenocarcinoma, NOS	Regional	T3	N2	M0	20	0	60	14	5	One primary only	50	Radiation before and after surgery	Beam radiation	Yes	Systemic therapy both before and after surgery	Dead (attributable to this cancer dx)	Alive or dead due to cancer	36	Dead
1169793	Single (never married)	White	71	Male	2010	Rectum	Moderately differentiated; Grade II	Positive histology	8261/3: Adenocarcinoma in villous adenoma	Regional	T3	N0	M0	20	0	64	8	0	One primary only	50	Radiation prior to surgery	Beam radiation	Yes	Systemic therapy both before and after surgery	Alive or dead of other cause	Alive or dead due to cancer	105	Alive
1169795	Single (never married)	White	78	Female	2010	Ascending Colon	Poorly differentiated; Grade III	Positive histology	8255/3: Adenocarcinoma with mixed subtypes	Localized	T3	N0	M0	10	0	80	29	0	One primary only	40	No radiation and/or cancer-directed surgery	None/Unknown	No/Unknown	No systemic therapy and/or surgical procedures	Alive or dead of other cause	Dead (attributable to causes other than this cancer dx)	32	Dead
1169828	Married (including common law)	Other (American Indian/AK Native, Asian/Pacific Islander)	52	Male	2010	Rectum	Moderately differentiated; Grade II	Positive histology	8261/3: Adenocarcinoma in villous adenoma	Localized	T3	N0	M0	10	0	30	15	0	One primary only	70	Radiation prior to surgery	Beam radiation	Yes	Systemic therapy both before and after surgery	Alive or dead of other cause	Alive or dead due to cancer	105	Alive
1169849	Widowed	White	81	Female	2010	Hepatic Flexure	Well differentiated; Grade I	Positive histology	8140/3: Adenocarcinoma, NOS	Regional	T4	N1	M0	10	999	85	0	98	One primary only	0	No radiation and/or cancer-directed surgery	None/Unknown	No/Unknown	No systemic therapy and/or surgical procedures	Dead (attributable to this cancer dx)	Alive or dead due to cancer	3	Dead
1169892	Widowed	Black	85	Female	2010	Ascending Colon	Moderately differentiated; Grade II	Positive histology	8140/3: Adenocarcinoma, NOS	Distant	T4	N1	M1	10	2	35	28	3	One primary only	40	No radiation and/or cancer-directed surgery	None/Unknown	No/Unknown	No systemic therapy and/or surgical procedures	Dead (attributable to this cancer dx)	Alive or dead due to cancer	16	Dead
1170459	Married (including common law)	White	72	Male	2010	Ascending Colon	Moderately differentiated; Grade II	Positive histology	8140/3: Adenocarcinoma, NOS	Localized	T3	N0	M0	20	0	999	23	0	One primary only	30	No radiation and/or cancer-directed surgery	None/Unknown	No/Unknown	No systemic therapy and/or surgical procedures	Alive or dead of other cause	Alive or dead due to cancer	104	Alive
1170476	Divorced	White	57	Male	2010	Ascending Colon	Moderately differentiated; Grade II	Positive histology	8140/3: Adenocarcinoma, NOS	Localized	T3	N0	M0	20	0	64	43	0	One primary only	40	No radiation and/or cancer-directed surgery	None/Unknown	Yes	Systemic therapy after surgery	Alive or dead of other cause	Alive or dead due to cancer	101	Alive
1170510	Single (never married)	Black	66	Female	2010	Rectosigmoid Junction	Moderately differentiated; Grade II	Positive histology	8140/3: Adenocarcinoma, NOS	Regional	T3	N1	M0	10	0	55	13	3	One primary only	30	No radiation and/or cancer-directed surgery	None/Unknown	Yes	Systemic therapy after surgery	Alive or dead of other cause	Alive or dead due to cancer	64	Alive
1170594	Married (including common law)	Other (American Indian/AK Native, Asian/Pacific Islander)	73	Male	2010	Rectum	Poorly differentiated; Grade III	Positive histology	8140/3: Adenocarcinoma, NOS	Distant	T3	N2	M1	999	0	80	13	6	One primary only	60	No radiation and/or cancer-directed surgery	None/Unknown	No/Unknown	No systemic therapy and/or surgical procedures	Alive or dead of other cause	Dead (attributable to causes other than this cancer dx)	0	Dead
1170598	Married (including common law)	Other (American Indian/AK Native, Asian/Pacific Islander)	48	Male	2010	Rectum	Moderately differentiated; Grade II	Positive histology	8140/3: Adenocarcinoma, NOS	Regional	T3	N1	M0	20	0	50	8	1	One primary only	30	Radiation prior to surgery	Radiation, NOS method or source not specified	Yes	Systemic therapy before surgery	Alive or dead of other cause	Alive or dead due to cancer	103	Alive
1170692	Married (including common law)	White	82	Female	2010	Cecum	Well differentiated; Grade I	Positive histology	8210/3: Adenocarcinoma in adenomatous polyp	Localized	T3	N0	M0	10	990	42	12	0	One primary only	40	No radiation and/or cancer-directed surgery	None/Unknown	Yes	Systemic therapy after surgery	Dead (attributable to this cancer dx)	Alive or dead due to cancer	7	Dead
1170758	Single (never married)	White	50	Male	2010	Rectum	Moderately differentiated; Grade II	Positive histology	8140/3: Adenocarcinoma, NOS	Regional	T3	N0	M0	998	0	30	15	0	One primary only	50	No radiation and/or cancer-directed surgery	None/Unknown	Yes	Systemic therapy before surgery	Alive or dead of other cause	Alive or dead due to cancer	101	Alive
1170763	Married (including common law)	Black	30	Male	2010	Cecum	Moderately differentiated; Grade II	Positive histology	8480/3: Mucinous adenocarcinoma	Distant	T4	N2	M1	10	990	70	13	13	One primary only	40	No radiation and/or cancer-directed surgery	None/Unknown	Yes	Systemic therapy after surgery	Dead (missing/unknown COD)	Dead (missing/unknown COD)	18	Dead
1170827	Married (including common law)	White	66	Female	2010	Cecum	Poorly differentiated; Grade III	Positive histology	8140/3: Adenocarcinoma, NOS	Regional	T4	N2	M0	10	0	60	16	15	One primary only	40	No radiation and/or cancer-directed surgery	None/Unknown	Yes	Systemic therapy after surgery	Dead (attributable to this cancer dx)	Alive or dead due to cancer	11	Dead
1170830	Widowed	White	85	Male	2010	Hepatic Flexure	Moderately differentiated; Grade II	Positive histology	8140/3: Adenocarcinoma, NOS	Localized	T3	N0	M0	998	0	45	23	0	One primary only	40	No radiation and/or cancer-directed surgery	None/Unknown	No/Unknown	No systemic therapy and/or surgical procedures	Alive or dead of other cause	Dead (attributable to causes other than this cancer dx)	45	Dead
1170831	Married (including common law)	White	67	Male	2010	Transverse Colon	Moderately differentiated; Grade II	Positive histology	8140/3: Adenocarcinoma, NOS	Regional	T3	N0	M0	20	0	25	17	0	One primary only	30	No radiation and/or cancer-directed surgery	None/Unknown	No/Unknown	No systemic therapy and/or surgical procedures	Alive or dead of other cause	Alive or dead due to cancer	105	Alive
1170834	Married (including common law)	White	70	Male	2010	Sigmoid Colon	Moderately differentiated; Grade II	Positive histology	8140/3: Adenocarcinoma, NOS	Localized	T2	N0	M0	998	0	34	18	0	One primary only	30	No radiation and/or cancer-directed surgery	None/Unknown	No/Unknown	No systemic therapy and/or surgical procedures	Alive or dead of other cause	Alive or dead due to cancer	106	Alive
1170851	Single (never married)	White	55	Female	2010	Rectum	Well differentiated; Grade I	Positive histology	8263/3: Adenocarcinoma in tubulovillous adenoma	Localized	T1	N0	M0	999	0	999	0	98	One primary only	27	No radiation and/or cancer-directed surgery	None/Unknown	No/Unknown	No systemic therapy and/or surgical procedures	Alive or dead of other cause	Alive or dead due to cancer	105	Alive
1170877	Married (including common law)	White	75	Male	2010	Rectum	Moderately differentiated; Grade II	Positive histology	8140/3: Adenocarcinoma, NOS	Regional	T1	N2	M0	998	0	999	0	98	One primary only	27	Radiation prior to surgery	Beam radiation	Yes	Systemic therapy before surgery	Dead (attributable to this cancer dx)	Alive or dead due to cancer	59	Dead
1170887	Widowed	Other (American Indian/AK Native, Asian/Pacific Islander)	85	Male	2010	Cecum	Moderately differentiated; Grade II	Positive histology	8140/3: Adenocarcinoma, NOS	Regional	T3	N1	M0	998	0	40	22	1	One primary only	40	No radiation and/or cancer-directed surgery	None/Unknown	No/Unknown	No systemic therapy and/or surgical procedures	Alive or dead of other cause	Dead (attributable to causes other than this cancer dx)	21	Dead
1170943	Married (including common law)	White	85	Female	2010	Cecum	Moderately differentiated; Grade II	Positive histology	8140/3: Adenocarcinoma, NOS	Localized	T1	N0	M0	20	999	999	0	98	One primary only	0	No radiation and/or cancer-directed surgery	None/Unknown	No/Unknown	No systemic therapy and/or surgical procedures	Dead (attributable to this cancer dx)	Alive or dead due to cancer	18	Dead
1170956	Married (including common law)	White	76	Female	2010	Cecum	Moderately differentiated; Grade II	Positive histology	8140/3: Adenocarcinoma, NOS	Regional	T4	N0	M0	998	0	80	16	0	One primary only	40	No radiation and/or cancer-directed surgery	None/Unknown	No/Unknown	No systemic therapy and/or surgical procedures	Alive or dead of other cause	Dead (attributable to causes other than this cancer dx)	9	Dead
1170969	Single (never married)	White	54	Female	2010	Hepatic Flexure	Moderately differentiated; Grade II	Positive histology	8140/3: Adenocarcinoma, NOS	Regional	T3	N1	M0	20	0	52	29	3	One primary only	40	No radiation and/or cancer-directed surgery	None/Unknown	Yes	Systemic therapy after surgery	Alive or dead of other cause	Alive or dead due to cancer	101	Alive
1171103	Widowed	Other (American Indian/AK Native, Asian/Pacific Islander)	85	Female	2010	Hepatic Flexure	Moderately differentiated; Grade II	Positive histology	8480/3: Mucinous adenocarcinoma	Regional	T3	N2	M0	10	0	70	16	5	One primary only	40	No radiation and/or cancer-directed surgery	None/Unknown	No/Unknown	No systemic therapy and/or surgical procedures	Alive or dead of other cause	Dead (attributable to causes other than this cancer dx)	72	Dead
1171131	Married (including common law)	White	58	Male	2010	Rectosigmoid Junction	Moderately differentiated; Grade II	Positive histology	8140/3: Adenocarcinoma, NOS	Distant	T3	N1	M1	20	0	50	15	1	One primary only	30	No radiation and/or cancer-directed surgery	None/Unknown	Yes	Systemic therapy both before and after surgery	Dead (attributable to this cancer dx)	Alive or dead due to cancer	22	Dead
1171206	Divorced	White	71	Male	2010	Ascending Colon	Moderately differentiated; Grade II	Positive histology	8480/3: Mucinous adenocarcinoma	Regional	T4	N2	M0	998	10	50	26	15	One primary only	30	No radiation and/or cancer-directed surgery	None/Unknown	Yes	Systemic therapy after surgery	Alive or dead of other cause	Alive or dead due to cancer	106	Alive
1171207	Married (including common law)	White	69	Female	2010	Sigmoid Colon	Undifferentiated; anaplastic; Grade IV	Positive histology	8140/3: Adenocarcinoma, NOS	Distant	T4	N0	M1	10	0	55	37	0	One primary only	30	No radiation and/or cancer-directed surgery	None/Unknown	No/Unknown	No systemic therapy and/or surgical procedures	Dead (attributable to this cancer dx)	Alive or dead due to cancer	15	Dead
1171221	Divorced	White	54	Female	2010	Sigmoid Colon	Moderately differentiated; Grade II	Positive histology	8140/3: Adenocarcinoma, NOS	Localized	T1	N0	M0	999	0	9	12	0	One primary only	30	No radiation and/or cancer-directed surgery	None/Unknown	No/Unknown	No systemic therapy and/or surgical procedures	Alive or dead of other cause	Alive or dead due to cancer	107	Alive
1171435	Married (including common law)	Unknown	45	Female	2010	Rectum	Moderately differentiated; Grade II	Positive histology	8263/3: Adenocarcinoma in tubulovillous adenoma	Localized	T1	N0	M0	998	999	10	0	98	One primary only	26	No radiation and/or cancer-directed surgery	None/Unknown	No/Unknown	No systemic therapy and/or surgical procedures	Alive or dead of other cause	Alive or dead due to cancer	102	Alive
1171441	Married (including common law)	White	81	Male	2010	Ascending Colon	Moderately differentiated; Grade II	Positive histology	8263/3: Adenocarcinoma in tubulovillous adenoma	Regional	T3	N0	M0	20	0	15	3	0	One primary only	40	No radiation and/or cancer-directed surgery	None/Unknown	No/Unknown	No systemic therapy and/or surgical procedures	Alive or dead of other cause	Alive or dead due to cancer	98	Alive
1171464	Single (never married)	White	73	Male	2010	Sigmoid Colon	Moderately differentiated; Grade II	Positive histology	8140/3: Adenocarcinoma, NOS	Localized	T3	N0	M0	999	999	90	14	0	One primary only	30	Radiation after surgery	Beam radiation	Yes	Systemic therapy after surgery	Alive or dead of other cause	Dead (attributable to causes other than this cancer dx)	37	Dead
1171507	Married (including common law)	Unknown	66	Female	2010	Cecum	Moderately differentiated; Grade II	Positive histology	8140/3: Adenocarcinoma, NOS	Regional	T3	N0	M0	20	0	50	30	0	One primary only	40	No radiation and/or cancer-directed surgery	None/Unknown	No/Unknown	No systemic therapy and/or surgical procedures	Alive or dead of other cause	Alive or dead due to cancer	98	Alive
1171551	Married (including common law)	White	46	Female	2010	Appendix	Moderately differentiated; Grade II	Positive histology	8140/3: Adenocarcinoma, NOS	Distant	T4	N0	M0	998	0	70	26	0	One primary only	41	No radiation and/or cancer-directed surgery	None/Unknown	Yes	Systemic therapy after surgery	Alive or dead of other cause	Alive or dead due to cancer	102	Alive
1171589	Married (including common law)	White	60	Female	2010	Rectum	Moderately differentiated; Grade II	Positive histology	8140/3: Adenocarcinoma, NOS	Regional	T1	N2	M0	20	0	22	19	14	One primary only	30	Radiation after surgery	Beam radiation	Yes	Systemic therapy after surgery	Alive or dead of other cause	Alive or dead due to cancer	100	Alive
1171609	Widowed	Other (American Indian/AK Native, Asian/Pacific Islander)	81	Male	2010	Rectum	Moderately differentiated; Grade II	Positive histology	8480/3: Mucinous adenocarcinoma	Regional	T3	N0	M0	999	0	37	8	0	One primary only	30	Radiation prior to surgery	Beam radiation	No/Unknown	No systemic therapy and/or surgical procedures	Dead (attributable to this cancer dx)	Alive or dead due to cancer	7	Dead
1171632	Married (including common law)	Other (American Indian/AK Native, Asian/Pacific Islander)	62	Male	2010	Rectum	Well differentiated; Grade I	Positive histology	8210/3: Adenocarcinoma in adenomatous polyp	Localized	T1	N0	M0	998	0	14	0	98	One primary only	26	No radiation and/or cancer-directed surgery	None/Unknown	No/Unknown	No systemic therapy and/or surgical procedures	Alive or dead of other cause	Alive or dead due to cancer	98	Alive
1171672	Widowed	White	85	Female	2010	Rectum	Moderately differentiated; Grade II	Positive histology	8140/3: Adenocarcinoma, NOS	Regional	T3	N0	M0	10	999	60	0	98	One primary only	0	No radiation and/or cancer-directed surgery	Radiation, NOS method or source not specified	Yes	No systemic therapy and/or surgical procedures	Dead (attributable to this cancer dx)	Alive or dead due to cancer	25	Dead
1171681	Married (including common law)	Other (American Indian/AK Native, Asian/Pacific Islander)	57	Male	2010	Rectum	Moderately differentiated; Grade II	Positive histology	8140/3: Adenocarcinoma, NOS	Localized	T3	N0	M0	20	0	30	12	0	One primary only	30	Radiation prior to surgery	Radiation, NOS method or source not specified	Yes	Systemic therapy before surgery	Dead (attributable to this cancer dx)	Alive or dead due to cancer	77	Dead
1171684	Married (including common law)	Other (American Indian/AK Native, Asian/Pacific Islander)	69	Male	2010	Cecum	Moderately differentiated; Grade II	Positive histology	8210/3: Adenocarcinoma in adenomatous polyp	Localized	T1	N0	M0	20	0	14	12	0	One primary only	40	No radiation and/or cancer-directed surgery	None/Unknown	No/Unknown	No systemic therapy and/or surgical procedures	Alive or dead of other cause	Alive or dead due to cancer	98	Alive
1171702	Married (including common law)	White	55	Male	2010	Cecum	Moderately differentiated; Grade II	Positive histology	8140/3: Adenocarcinoma, NOS	Regional	T4	N0	M0	999	0	45	19	0	One primary only	30	No radiation and/or cancer-directed surgery	None/Unknown	No/Unknown	No systemic therapy and/or surgical procedures	Alive or dead of other cause	Alive or dead due to cancer	106	Alive
1171713	Divorced	Other (American Indian/AK Native, Asian/Pacific Islander)	55	Male	2010	Rectum	Moderately differentiated; Grade II	Positive histology	8140/3: Adenocarcinoma, NOS	Distant	T1	N1	M1	999	0	55	0	98	One primary only	0	No radiation and/or cancer-directed surgery	None/Unknown	Yes	No systemic therapy and/or surgical procedures	Alive or dead of other cause	Alive or dead due to cancer	29	Alive
1171732	Married (including common law)	Other (American Indian/AK Native, Asian/Pacific Islander)	54	Male	2010	Transverse Colon	Moderately differentiated; Grade II	Positive histology	8140/3: Adenocarcinoma, NOS	Localized	T1	N0	M0	999	0	14	7	0	One primary only	40	No radiation and/or cancer-directed surgery	None/Unknown	No/Unknown	No systemic therapy and/or surgical procedures	Alive or dead of other cause	Alive or dead due to cancer	106	Alive
1171748	Single (never married)	White	46	Female	2010	Sigmoid Colon	Moderately differentiated; Grade II	Positive histology	8140/3: Adenocarcinoma, NOS	Localized	T3	N0	M0	20	0	55	19	0	One primary only	30	No radiation and/or cancer-directed surgery	None/Unknown	No/Unknown	No systemic therapy and/or surgical procedures	Dead (attributable to this cancer dx)	Alive or dead due to cancer	87	Dead
1171799	Married (including common law)	White	78	Female	2010	Cecum	Well differentiated; Grade I	Positive histology	8263/3: Adenocarcinoma in tubulovillous adenoma	Localized	T2	N0	M0	10	0	15	18	0	One primary only	30	No radiation and/or cancer-directed surgery	None/Unknown	No/Unknown	No systemic therapy and/or surgical procedures	Alive or dead of other cause	Alive or dead due to cancer	99	Alive
1171801	Married (including common law)	White	49	Female	2010	Rectum	Moderately differentiated; Grade II	Positive histology	8210/3: Adenocarcinoma in adenomatous polyp	Regional	T3	N0	M0	20	0	30	20	0	One primary only	30	Radiation before and after surgery	Beam radiation	Yes	Systemic therapy both before and after surgery	Alive or dead of other cause	Alive or dead due to cancer	98	Alive
1171916	Widowed	White	77	Male	2010	Rectum	Moderately differentiated; Grade II	Positive histology	8140/3: Adenocarcinoma, NOS	Localized	T2	N0	M0	997	998	8	0	98	One primary only	20	Radiation after surgery	Beam radiation	No/Unknown	No systemic therapy and/or surgical procedures	Dead (attributable to this cancer dx)	Alive or dead due to cancer	82	Dead
1171925	Divorced	White	71	Female	2010	Sigmoid Colon	Moderately differentiated; Grade II	Positive histology	8140/3: Adenocarcinoma, NOS	Regional	T3	N2	M0	20	0	28	19	5	One primary only	30	No radiation and/or cancer-directed surgery	None/Unknown	No/Unknown	No systemic therapy and/or surgical procedures	Alive or dead of other cause	Alive or dead due to cancer	100	Alive
1171945	Married (including common law)	White	71	Male	2010	Rectum	Poorly differentiated; Grade III	Positive histology	8263/3: Adenocarcinoma in tubulovillous adenoma	Regional	T3	N1	M0	998	999	50	13	1	One primary only	30	Radiation prior to surgery	Beam radiation	Yes	Systemic therapy before surgery	Dead (attributable to this cancer dx)	Alive or dead due to cancer	32	Dead
1171956	Single (never married)	Other (American Indian/AK Native, Asian/Pacific Islander)	62	Male	2010	Rectosigmoid Junction	Moderately differentiated; Grade II	Positive histology	8140/3: Adenocarcinoma, NOS	Localized	T1	N0	M0	998	999	999	0	98	One primary only	27	No radiation and/or cancer-directed surgery	None/Unknown	No/Unknown	No systemic therapy and/or surgical procedures	Dead (attributable to this cancer dx)	Alive or dead due to cancer	1	Dead
1171992	Married (including common law)	Black	63	Female	2010	Cecum	Poorly differentiated; Grade III	Positive histology	8140/3: Adenocarcinoma, NOS	Regional	T3	N1	M0	10	0	32	22	3	One primary only	40	No radiation and/or cancer-directed surgery	None/Unknown	Yes	Systemic therapy after surgery	Dead (attributable to this cancer dx)	Alive or dead due to cancer	30	Dead
1171995	Married (including common law)	White	42	Female	2010	Cecum	Poorly differentiated; Grade III	Positive histology	8263/3: Adenocarcinoma in tubulovillous adenoma	Distant	T4	N2	M1	10	990	56	55	7	One primary only	40	No radiation and/or cancer-directed surgery	None/Unknown	Yes	Systemic therapy after surgery	Alive or dead of other cause	Alive or dead due to cancer	46	Alive
1172003	Married (including common law)	Other (American Indian/AK Native, Asian/Pacific Islander)	64	Male	2010	Sigmoid Colon	Moderately differentiated; Grade II	Positive histology	8140/3: Adenocarcinoma, NOS	Regional	T3	N2	M0	999	0	40	34	6	One primary only	80	No radiation and/or cancer-directed surgery	None/Unknown	Yes	Systemic therapy after surgery	Alive or dead of other cause	Alive or dead due to cancer	66	Alive
1172026	Single (never married)	White	56	Male	2010	Cecum	Moderately differentiated; Grade II	Positive histology	8263/3: Adenocarcinoma in tubulovillous adenoma	Localized	T3	N0	M0	10	0	90	30	0	One primary only	40	No radiation and/or cancer-directed surgery	None/Unknown	No/Unknown	No systemic therapy and/or surgical procedures	Alive or dead of other cause	Alive or dead due to cancer	73	Alive
1172038	Single (never married)	Other (American Indian/AK Native, Asian/Pacific Islander)	62	Male	2010	Sigmoid Colon	Moderately differentiated; Grade II	Positive histology	8263/3: Adenocarcinoma in tubulovillous adenoma	Distant	T3	N1	M1	10	0	75	18	2	One primary only	30	No radiation and/or cancer-directed surgery	None/Unknown	Yes	Systemic therapy after surgery	Alive or dead of other cause	Alive or dead due to cancer	65	Alive
1172126	Single (never married)	White	32	Male	2010	Cecum	Poorly differentiated; Grade III	Positive histology	8140/3: Adenocarcinoma, NOS	Localized	T3	N0	M0	998	0	80	26	0	One primary only	40	No radiation and/or cancer-directed surgery	None/Unknown	No/Unknown	No systemic therapy and/or surgical procedures	Dead (missing/unknown COD)	Dead (missing/unknown COD)	3	Dead
1172188	Married (including common law)	White	85	Male	2010	Sigmoid Colon	Moderately differentiated; Grade II	Positive histology	8263/3: Adenocarcinoma in tubulovillous adenoma	Localized	T1	N0	M0	998	0	18	21	0	One primary only	30	No radiation and/or cancer-directed surgery	None/Unknown	No/Unknown	No systemic therapy and/or surgical procedures	Alive or dead of other cause	Dead (attributable to causes other than this cancer dx)	46	Dead
1172200	Married (including common law)	White	61	Male	2010	Ascending Colon	Moderately differentiated; Grade II	Positive histology	8263/3: Adenocarcinoma in tubulovillous adenoma	Regional	T2	N2	M0	20	0	35	19	7	One primary only	40	No radiation and/or cancer-directed surgery	None/Unknown	Yes	Systemic therapy after surgery	Alive or dead of other cause	Alive or dead due to cancer	101	Alive
1172201	Married (including common law)	White	81	Female	2010	Cecum	Moderately differentiated; Grade II	Positive histology	8140/3: Adenocarcinoma, NOS	Regional	T3	N2	M0	998	0	25	19	5	One primary only	40	No radiation and/or cancer-directed surgery	None/Unknown	Yes	Systemic therapy after surgery	Alive or dead of other cause	Alive or dead due to cancer	104	Alive
1172230	Divorced	White	58	Female	2010	Sigmoid Colon	Poorly differentiated; Grade III	Positive histology	8480/3: Mucinous adenocarcinoma	Localized	T3	N0	M0	999	0	65	29	0	One primary only	30	No radiation and/or cancer-directed surgery	None/Unknown	No/Unknown	No systemic therapy and/or surgical procedures	Alive or dead of other cause	Alive or dead due to cancer	103	Alive
1172236	Widowed	White	85	Female	2010	Cecum	Moderately differentiated; Grade II	Positive histology	8263/3: Adenocarcinoma in tubulovillous adenoma	Localized	T2	N0	M0	999	0	25	7	0	One primary only	40	No radiation and/or cancer-directed surgery	None/Unknown	No/Unknown	No systemic therapy and/or surgical procedures	Alive or dead of other cause	Dead (attributable to causes other than this cancer dx)	51	Dead
1172238	Divorced	White	70	Female	2010	Cecum	Poorly differentiated; Grade III	Positive histology	8140/3: Adenocarcinoma, NOS	Regional	T3	N1	M0	999	0	76	23	3	One primary only	40	No radiation and/or cancer-directed surgery	None/Unknown	Yes	Systemic therapy after surgery	Dead (attributable to this cancer dx)	Alive or dead due to cancer	6	Dead
1172280	Married (including common law)	White	38	Male	2010	Appendix	Moderately differentiated; Grade II	Positive histology	8480/3: Mucinous adenocarcinoma	Distant	T4	N0	M1	998	999	999	2	0	One primary only	51	No radiation and/or cancer-directed surgery	None/Unknown	Yes	Systemic therapy after surgery	Alive or dead of other cause	Alive or dead due to cancer	99	Alive
1172320	Divorced	White	62	Female	2010	Rectum	Moderately differentiated; Grade II	Positive histology	8140/3: Adenocarcinoma, NOS	Regional	T3	N1	M0	10	999	70	9	0	One primary only	50	Radiation before and after surgery	Beam radiation	Yes	Systemic therapy before surgery	Dead (attributable to this cancer dx)	Alive or dead due to cancer	75	Dead
1172447	Widowed	White	80	Female	2010	Ascending Colon	Poorly differentiated; Grade III	Positive histology	8140/3: Adenocarcinoma, NOS	Regional	T4	N0	M0	20	0	75	20	0	One primary only	40	No radiation and/or cancer-directed surgery	None/Unknown	Yes	Systemic therapy after surgery	Alive or dead of other cause	Alive or dead due to cancer	98	Alive
1172480	Widowed	White	63	Female	2010	Cecum	Moderately differentiated; Grade II	Positive histology	8140/3: Adenocarcinoma, NOS	Localized	T3	N0	M0	10	0	35	41	0	One primary only	40	No radiation and/or cancer-directed surgery	None/Unknown	No/Unknown	No systemic therapy and/or surgical procedures	Alive or dead of other cause	Dead (attributable to causes other than this cancer dx)	9	Dead
1172521	Divorced	White	54	Male	2010	Sigmoid Colon	Moderately differentiated; Grade II	Positive histology	8140/3: Adenocarcinoma, NOS	Localized	T3	N0	M0	10	0	60	43	0	One primary only	60	No radiation and/or cancer-directed surgery	None/Unknown	No/Unknown	No systemic therapy and/or surgical procedures	Alive or dead of other cause	Alive or dead due to cancer	102	Alive
1172525	Married (including common law)	White	74	Male	2010	Transverse Colon	Well differentiated; Grade I	Positive histology	8140/3: Adenocarcinoma, NOS	Regional	T3	N1	M0	20	0	40	28	2	One primary only	30	No radiation and/or cancer-directed surgery	None/Unknown	Yes	Systemic therapy after surgery	Alive or dead of other cause	Alive or dead due to cancer	83	Alive
1172645	Married (including common law)	Other (American Indian/AK Native, Asian/Pacific Islander)	78	Male	2010	Ascending Colon	Poorly differentiated; Grade III	Positive histology	8140/3: Adenocarcinoma, NOS	Regional	T3	N2	M0	20	0	20	18	5	One primary only	40	No radiation and/or cancer-directed surgery	None/Unknown	Yes	Systemic therapy after surgery	Alive or dead of other cause	Alive or dead due to cancer	94	Alive
1172676	Unknown	White	85	Male	2010	Cecum	Moderately differentiated; Grade II	Positive histology	8140/3: Adenocarcinoma, NOS	Localized	T2	N0	M0	998	0	40	16	0	One primary only	40	No radiation and/or cancer-directed surgery	None/Unknown	No/Unknown	No systemic therapy and/or surgical procedures	Alive or dead of other cause	Alive or dead due to cancer	98	Alive
1172694	Single (never married)	White	85	Male	2010	Cecum	Moderately differentiated; Grade II	Positive histology	8140/3: Adenocarcinoma, NOS	Localized	T3	N0	M0	999	999	45	21	0	One primary only	40	No radiation and/or cancer-directed surgery	None/Unknown	No/Unknown	No systemic therapy and/or surgical procedures	Alive or dead of other cause	Dead (attributable to causes other than this cancer dx)	8	Dead
1172695	Married (including common law)	White	42	Female	2010	Descending Colon	Poorly differentiated; Grade III	Positive histology	8480/3: Mucinous adenocarcinoma	Regional	T3	N0	M0	20	999	65	33	0	One primary only	40	No radiation and/or cancer-directed surgery	None/Unknown	Yes	Systemic therapy after surgery	Alive or dead of other cause	Alive or dead due to cancer	104	Alive
1172740	Married (including common law)	White	53	Male	2010	Transverse Colon	Poorly differentiated; Grade III	Positive histology	8480/3: Mucinous adenocarcinoma	Localized	T2	N0	M0	20	0	70	19	0	One primary only	30	No radiation and/or cancer-directed surgery	None/Unknown	No/Unknown	No systemic therapy and/or surgical procedures	Alive or dead of other cause	Alive or dead due to cancer	102	Alive
1172745	Married (including common law)	White	80	Male	2010	Cecum	Poorly differentiated; Grade III	Positive histology	8140/3: Adenocarcinoma, NOS	Regional	T3	N1	M0	20	0	38	17	2	One primary only	30	No radiation and/or cancer-directed surgery	None/Unknown	Yes	Systemic therapy after surgery	Alive or dead of other cause	Alive or dead due to cancer	103	Alive
1172755	Married (including common law)	White	49	Female	2010	Cecum	Well differentiated; Grade I	Positive histology	8480/3: Mucinous adenocarcinoma	Regional	T4	N1	M0	20	0	40	16	1	One primary only	40	No radiation and/or cancer-directed surgery	None/Unknown	Yes	Systemic therapy after surgery	Dead (attributable to this cancer dx)	Alive or dead due to cancer	85	Dead
1172793	Single (never married)	White	42	Female	2010	Sigmoid Colon	Moderately differentiated; Grade II	Positive histology	8140/3: Adenocarcinoma, NOS	Localized	T2	N0	M0	20	0	34	25	0	One primary only	40	No radiation and/or cancer-directed surgery	None/Unknown	No/Unknown	No systemic therapy and/or surgical procedures	Alive or dead of other cause	Alive or dead due to cancer	103	Alive
1172819	Widowed	White	75	Female	2010	Sigmoid Colon	Moderately differentiated; Grade II	Positive histology	8263/3: Adenocarcinoma in tubulovillous adenoma	Distant	T2	N1	M1	999	0	55	13	2	One primary only	30	Radiation after surgery	Beam radiation	Yes	Systemic therapy after surgery	Dead (attributable to this cancer dx)	Alive or dead due to cancer	88	Dead
1172849	Married (including common law)	White	51	Female	2010	Rectum	Moderately differentiated; Grade II	Positive histology	8140/3: Adenocarcinoma, NOS	Localized	T1	N0	M0	20	0	30	26	0	One primary only	30	No radiation and/or cancer-directed surgery	None/Unknown	No/Unknown	No systemic therapy and/or surgical procedures	Alive or dead of other cause	Alive or dead due to cancer	100	Alive
1172856	Married (including common law)	White	38	Male	2010	Sigmoid Colon	Moderately differentiated; Grade II	Positive histology	8140/3: Adenocarcinoma, NOS	Regional	T3	N0	M0	10	0	19	20	0	One primary only	30	No radiation and/or cancer-directed surgery	None/Unknown	No/Unknown	No systemic therapy and/or surgical procedures	Alive or dead of other cause	Dead (attributable to causes other than this cancer dx)	30	Dead
1172876	Married (including common law)	White	62	Male	2010	Sigmoid Colon	Moderately differentiated; Grade II	Positive histology	8140/3: Adenocarcinoma, NOS	Regional	T3	N0	M0	20	0	35	13	0	One primary only	30	No radiation and/or cancer-directed surgery	None/Unknown	No/Unknown	No systemic therapy and/or surgical procedures	Alive or dead of other cause	Alive or dead due to cancer	101	Alive
1172893	Married (including common law)	Other (American Indian/AK Native, Asian/Pacific Islander)	62	Male	2010	Cecum	Moderately differentiated; Grade II	Positive histology	8140/3: Adenocarcinoma, NOS	Regional	T3	N2	M0	20	0	77	19	6	One primary only	40	No radiation and/or cancer-directed surgery	None/Unknown	Yes	Systemic therapy after surgery	Alive or dead of other cause	Alive or dead due to cancer	98	Alive
1172938	Married (including common law)	White	75	Female	2010	Descending Colon	Moderately differentiated; Grade II	Positive histology	8263/3: Adenocarcinoma in tubulovillous adenoma	Localized	T2	N0	M0	20	0	83	10	0	One primary only	40	No radiation and/or cancer-directed surgery	None/Unknown	No/Unknown	No systemic therapy and/or surgical procedures	Alive or dead of other cause	Alive or dead due to cancer	99	Alive
1173014	Married (including common law)	White	72	Male	2010	Cecum	Moderately differentiated; Grade II	Positive histology	8140/3: Adenocarcinoma, NOS	Regional	T3	N1	M0	20	0	80	25	1	One primary only	40	No radiation and/or cancer-directed surgery	None/Unknown	Yes	Systemic therapy after surgery	Alive or dead of other cause	Dead (attributable to causes other than this cancer dx)	98	Dead
1173018	Widowed	White	65	Female	2010	Ascending Colon	Moderately differentiated; Grade II	Positive histology	8140/3: Adenocarcinoma, NOS	Localized	T3	N0	M0	999	0	40	35	0	One primary only	40	No radiation and/or cancer-directed surgery	None/Unknown	No/Unknown	No systemic therapy and/or surgical procedures	Alive or dead of other cause	Alive or dead due to cancer	99	Alive
1173110	Single (never married)	White	63	Female	2010	Sigmoid Colon	Moderately differentiated; Grade II	Positive histology	8140/3: Adenocarcinoma, NOS	Regional	T3	N1	M0	999	1	23	15	0	One primary only	30	Radiation after surgery	Beam radiation	Yes	Systemic therapy after surgery	Dead (attributable to this cancer dx)	Alive or dead due to cancer	97	Dead
1173121	Divorced	White	63	Female	2010	Sigmoid Colon	Moderately differentiated; Grade II	Positive histology	8210/3: Adenocarcinoma in adenomatous polyp	Localized	T2	N0	M0	999	0	10	8	0	One primary only	30	No radiation and/or cancer-directed surgery	None/Unknown	No/Unknown	No systemic therapy and/or surgical procedures	Alive or dead of other cause	Alive or dead due to cancer	104	Alive
1173126	Married (including common law)	White	53	Male	2010	Rectum	Moderately differentiated; Grade II	Positive histology	8140/3: Adenocarcinoma, NOS	Regional	T3	N1	M0	20	0	60	28	2	One primary only	30	No radiation and/or cancer-directed surgery	None/Unknown	Yes	Systemic therapy after surgery	Dead (attributable to this cancer dx)	Alive or dead due to cancer	19	Dead
1173270	Divorced	Black	59	Male	2010	Cecum	Poorly differentiated; Grade III	Positive histology	8140/3: Adenocarcinoma, NOS	Distant	T3	N2	M1	998	0	40	20	13	One primary only	40	No radiation and/or cancer-directed surgery	None/Unknown	No/Unknown	No systemic therapy and/or surgical procedures	Dead (attributable to this cancer dx)	Alive or dead due to cancer	5	Dead
1173291	Widowed	White	85	Female	2010	Hepatic Flexure	Moderately differentiated; Grade II	Positive histology	8140/3: Adenocarcinoma, NOS	Regional	T3	N0	M0	20	0	45	23	0	One primary only	40	No radiation and/or cancer-directed surgery	None/Unknown	No/Unknown	No systemic therapy and/or surgical procedures	Alive or dead of other cause	Alive or dead due to cancer	99	Alive
1173340	Married (including common law)	White	76	Male	2010	Cecum	Moderately differentiated; Grade II	Positive histology	8263/3: Adenocarcinoma in tubulovillous adenoma	Localized	T2	N0	M0	10	0	18	13	0	One primary only	40	No radiation and/or cancer-directed surgery	None/Unknown	No/Unknown	No systemic therapy and/or surgical procedures	Alive or dead of other cause	Dead (attributable to causes other than this cancer dx)	70	Dead
1173346	Married (including common law)	White	85	Male	2010	Cecum	Moderately differentiated; Grade II	Positive histology	8140/3: Adenocarcinoma, NOS	Localized	T3	N0	M0	999	0	40	15	0	One primary only	40	No radiation and/or cancer-directed surgery	None/Unknown	No/Unknown	No systemic therapy and/or surgical procedures	Alive or dead of other cause	Alive or dead due to cancer	107	Alive
1173441	Married (including common law)	White	76	Female	2010	Sigmoid Colon	Moderately differentiated; Grade II	Positive histology	8140/3: Adenocarcinoma, NOS	Localized	T1	N0	M0	20	999	30	0	98	One primary only	0	No radiation and/or cancer-directed surgery	None/Unknown	No/Unknown	No systemic therapy and/or surgical procedures	Alive or dead of other cause	Dead (attributable to causes other than this cancer dx)	26	Dead
1173444	Single (never married)	White	59	Male	2010	Rectosigmoid Junction	Moderately differentiated; Grade II	Positive histology	8140/3: Adenocarcinoma, NOS	Regional	T3	N1	M0	10	1	999	0	98	One primary only	30	Radiation prior to surgery	Beam radiation	Yes	Systemic therapy before surgery	Alive or dead of other cause	Alive or dead due to cancer	99	Alive
1173471	Single (never married)	Black	46	Female	2010	Rectosigmoid Junction	Moderately differentiated; Grade II	Positive histology	8140/3: Adenocarcinoma, NOS	Regional	T3	N2	M0	10	999	40	15	3	One primary only	30	No radiation and/or cancer-directed surgery	None/Unknown	Yes	Systemic therapy after surgery	Alive or dead of other cause	Alive or dead due to cancer	106	Alive
1173505	Married (including common law)	White	72	Male	2010	Cecum	Moderately differentiated; Grade II	Positive histology	8140/3: Adenocarcinoma, NOS	Regional	T2	N1	M0	20	0	35	18	1	One primary only	40	No radiation and/or cancer-directed surgery	None/Unknown	Yes	Systemic therapy after surgery	Alive or dead of other cause	Alive or dead due to cancer	100	Alive
1173560	Married (including common law)	White	72	Female	2010	Hepatic Flexure	Moderately differentiated; Grade II	Positive histology	8480/3: Mucinous adenocarcinoma	Distant	T4	N2	M1	10	990	70	98	97	One primary only	70	No radiation and/or cancer-directed surgery	None/Unknown	Yes	Systemic therapy after surgery	Dead (attributable to this cancer dx)	Alive or dead due to cancer	34	Dead
1173610	Widowed	White	75	Female	2010	Hepatic Flexure	Moderately differentiated; Grade II	Positive histology	8261/3: Adenocarcinoma in villous adenoma	Localized	T2	N0	M0	998	0	35	22	0	One primary only	40	No radiation and/or cancer-directed surgery	None/Unknown	No/Unknown	No systemic therapy and/or surgical procedures	Dead (attributable to this cancer dx)	Alive or dead due to cancer	54	Dead
1173698	Married (including common law)	White	67	Male	2010	Rectum	Moderately differentiated; Grade II	Positive histology	8262/3: Villous adenocarcinoma	Localized	T1	N0	M0	20	0	13	35	0	One primary only	30	No radiation and/or cancer-directed surgery	None/Unknown	No/Unknown	No systemic therapy and/or surgical procedures	Alive or dead of other cause	Alive or dead due to cancer	100	Alive
1173705	Widowed	White	85	Female	2010	Cecum	Poorly differentiated; Grade III	Positive histology	8140/3: Adenocarcinoma, NOS	Regional	T3	N0	M0	20	0	70	28	0	One primary only	40	No radiation and/or cancer-directed surgery	None/Unknown	No/Unknown	No systemic therapy and/or surgical procedures	Alive or dead of other cause	Alive or dead due to cancer	99	Alive
1173707	Married (including common law)	White	74	Male	2010	Cecum	Moderately differentiated; Grade II	Positive histology	8140/3: Adenocarcinoma, NOS	Distant	T4	N2	M1	20	0	100	98	4	One primary only	40	No radiation and/or cancer-directed surgery	None/Unknown	Yes	Systemic therapy after surgery	Dead (attributable to this cancer dx)	Alive or dead due to cancer	35	Dead
1173895	Widowed	White	59	Female	2010	Sigmoid Colon	Poorly differentiated; Grade III	Positive histology	8140/3: Adenocarcinoma, NOS	Localized	T3	N0	M0	20	0	43	16	0	One primary only	30	No radiation and/or cancer-directed surgery	None/Unknown	No/Unknown	No systemic therapy and/or surgical procedures	Alive or dead of other cause	Alive or dead due to cancer	39	Alive
1174001	Single (never married)	White	68	Female	2010	Cecum	Moderately differentiated; Grade II	Positive histology	8481/3: Mucin-producing adenocarcinoma	Distant	T3	N1	M1	999	990	70	18	1	One primary only	41	No radiation and/or cancer-directed surgery	None/Unknown	No/Unknown	No systemic therapy and/or surgical procedures	Dead (attributable to this cancer dx)	Alive or dead due to cancer	5	Dead
1174070	Married (including common law)	White	73	Male	2010	Transverse Colon	Poorly differentiated; Grade III	Positive histology	8210/3: Adenocarcinoma in adenomatous polyp	Localized	T3	N0	M0	10	0	47	33	0	One primary only	30	No radiation and/or cancer-directed surgery	None/Unknown	No/Unknown	No systemic therapy and/or surgical procedures	Alive or dead of other cause	Alive or dead due to cancer	98	Alive
1174091	Married (including common law)	White	60	Male	2010	Cecum	Moderately differentiated; Grade II	Positive histology	8140/3: Adenocarcinoma, NOS	Localized	T2	N0	M0	20	0	25	19	0	One primary only	70	No radiation and/or cancer-directed surgery	None/Unknown	No/Unknown	No systemic therapy and/or surgical procedures	Alive or dead of other cause	Alive or dead due to cancer	106	Alive
1174106	Married (including common law)	White	68	Male	2010	Rectum	Moderately differentiated; Grade II	Positive histology	8140/3: Adenocarcinoma, NOS	Regional	T3	N2	M0	10	0	20	19	8	One primary only	30	No radiation and/or cancer-directed surgery	None/Unknown	No/Unknown	No systemic therapy and/or surgical procedures	Dead (attributable to this cancer dx)	Alive or dead due to cancer	4	Dead
1174109	Single (never married)	White	77	Female	2010	Rectosigmoid Junction	Moderately differentiated; Grade II	Positive histology	8140/3: Adenocarcinoma, NOS	Localized	T1	N0	M0	997	0	28	12	0	One primary only	30	No radiation and/or cancer-directed surgery	None/Unknown	No/Unknown	No systemic therapy and/or surgical procedures	Alive or dead of other cause	Alive or dead due to cancer	101	Alive
1174279	Divorced	Other (American Indian/AK Native, Asian/Pacific Islander)	69	Male	2010	Ascending Colon	Moderately differentiated; Grade II	Positive histology	8140/3: Adenocarcinoma, NOS	Regional	T3	N2	M0	10	0	40	26	4	One primary only	40	No radiation and/or cancer-directed surgery	None/Unknown	No/Unknown	No systemic therapy and/or surgical procedures	Alive or dead of other cause	Alive or dead due to cancer	107	Alive
1174320	Married (including common law)	Other (American Indian/AK Native, Asian/Pacific Islander)	67	Male	2010	Rectum	Moderately differentiated; Grade II	Positive histology	8140/3: Adenocarcinoma, NOS	Regional	T4	N2	M0	20	0	32	21	4	One primary only	50	Radiation prior to surgery	Beam radiation	Yes	Systemic therapy before surgery	Dead (attributable to this cancer dx)	Alive or dead due to cancer	60	Dead
1174480	Married (including common law)	White	66	Female	2010	Rectosigmoid Junction	Moderately differentiated; Grade II	Positive histology	8140/3: Adenocarcinoma, NOS	Localized	T2	N0	M0	998	0	40	12	0	One primary only	30	No radiation and/or cancer-directed surgery	None/Unknown	No/Unknown	No systemic therapy and/or surgical procedures	Alive or dead of other cause	Alive or dead due to cancer	99	Alive
1174511	Married (including common law)	White	75	Female	2010	Ascending Colon	Poorly differentiated; Grade III	Positive histology	8140/3: Adenocarcinoma, NOS	Distant	T3	N0	M1	20	0	60	14	0	One primary only	40	No radiation and/or cancer-directed surgery	None/Unknown	No/Unknown	No systemic therapy and/or surgical procedures	Dead (attributable to this cancer dx)	Alive or dead due to cancer	2	Dead
1174610	Single (never married)	White	47	Male	2010	Sigmoid Colon	Moderately differentiated; Grade II	Positive histology	8140/3: Adenocarcinoma, NOS	Distant	T3	N0	M1	10	0	35	6	0	One primary only	30	No radiation and/or cancer-directed surgery	None/Unknown	Yes	Systemic therapy after surgery	Dead (attributable to this cancer dx)	Alive or dead due to cancer	32	Dead
1174613	Single (never married)	Black	58	Male	2010	Sigmoid Colon	Moderately differentiated; Grade II	Positive histology	8210/3: Adenocarcinoma in adenomatous polyp	Distant	T3	N2	M1	10	0	40	28	4	One primary only	30	No radiation and/or cancer-directed surgery	None/Unknown	Yes	Systemic therapy after surgery	Dead (attributable to this cancer dx)	Alive or dead due to cancer	39	Dead
1174624	Married (including common law)	White	58	Female	2010	Rectum	Moderately differentiated; Grade II	Positive histology	8140/3: Adenocarcinoma, NOS	Distant	T3	N1	M1	999	998	70	0	98	One primary only	0	No radiation and/or cancer-directed surgery	Beam radiation	Yes	No systemic therapy and/or surgical procedures	Alive or dead of other cause	Alive or dead due to cancer	97	Alive
1174680	Widowed	Black	72	Female	2010	Cecum	Poorly differentiated; Grade III	Positive histology	8140/3: Adenocarcinoma, NOS	Distant	T4	N1	M1	10	0	80	29	2	One primary only	40	No radiation and/or cancer-directed surgery	None/Unknown	Yes	Systemic therapy after surgery	Alive or dead of other cause	Alive or dead due to cancer	100	Alive
1174765	Married (including common law)	Other (American Indian/AK Native, Asian/Pacific Islander)	59	Female	2010	Transverse Colon	Poorly differentiated; Grade III	Positive histology	8140/3: Adenocarcinoma, NOS	Distant	T3	N2	M1	20	0	50	15	11	One primary only	40	No radiation and/or cancer-directed surgery	None/Unknown	Yes	Systemic therapy after surgery	Dead (attributable to this cancer dx)	Alive or dead due to cancer	63	Dead
1174923	Divorced	White	80	Female	2010	Rectum	Moderately differentiated; Grade II	Positive histology	8140/3: Adenocarcinoma, NOS	Regional	T3	N2	M0	999	0	45	27	7	One primary only	30	No radiation and/or cancer-directed surgery	None/Unknown	No/Unknown	No systemic therapy and/or surgical procedures	Dead (missing/unknown COD)	Dead (missing/unknown COD)	11	Dead
1174966	Married (including common law)	White	85	Female	2010	Rectosigmoid Junction	Moderately differentiated; Grade II	Positive histology	8140/3: Adenocarcinoma, NOS	Regional	T3	N0	M0	20	0	50	12	0	One primary only	30	No radiation and/or cancer-directed surgery	None/Unknown	No/Unknown	No systemic therapy and/or surgical procedures	Dead (attributable to this cancer dx)	Alive or dead due to cancer	5	Dead
1174981	Single (never married)	White	68	Female	2010	Sigmoid Colon	Moderately differentiated; Grade II	Positive histology	8263/3: Adenocarcinoma in tubulovillous adenoma	Localized	T1	N0	M0	998	998	10	0	98	One primary only	28	No radiation and/or cancer-directed surgery	None/Unknown	No/Unknown	No systemic therapy and/or surgical procedures	Alive or dead of other cause	Alive or dead due to cancer	100	Alive
1175000	Single (never married)	White	64	Male	2010	Sigmoid Colon	Moderately differentiated; Grade II	Positive histology	8140/3: Adenocarcinoma, NOS	Regional	T4	N0	M0	10	0	61	29	0	One primary only	40	No radiation and/or cancer-directed surgery	None/Unknown	Yes	Systemic therapy after surgery	Dead (attributable to this cancer dx)	Alive or dead due to cancer	17	Dead
1175054	Married (including common law)	White	64	Male	2010	Cecum	Well differentiated; Grade I	Positive histology	8263/3: Adenocarcinoma in tubulovillous adenoma	Regional	T1	N1	M0	10	0	65	10	1	One primary only	40	No radiation and/or cancer-directed surgery	None/Unknown	Yes	Systemic therapy after surgery	Alive or dead of other cause	Alive or dead due to cancer	98	Alive
1175063	Married (including common law)	Other (American Indian/AK Native, Asian/Pacific Islander)	85	Male	2010	Ascending Colon	Moderately differentiated; Grade II	Positive histology	8140/3: Adenocarcinoma, NOS	Distant	T4	N1	M1	998	990	55	0	98	One primary only	40	No radiation and/or cancer-directed surgery	None/Unknown	No/Unknown	No systemic therapy and/or surgical procedures	Dead (attributable to this cancer dx)	Alive or dead due to cancer	0	Dead
1175095	Married (including common law)	Other (American Indian/AK Native, Asian/Pacific Islander)	56	Male	2010	Descending Colon	Moderately differentiated; Grade II	Positive histology	8140/3: Adenocarcinoma, NOS	Localized	T2	N0	M0	20	0	30	15	0	One primary only	30	No radiation and/or cancer-directed surgery	None/Unknown	No/Unknown	No systemic therapy and/or surgical procedures	Alive or dead of other cause	Alive or dead due to cancer	92	Alive
1175097	Single (never married)	White	82	Male	2010	Splenic Flexure	Moderately differentiated; Grade II	Positive histology	8140/3: Adenocarcinoma, NOS	Regional	T3	N1	M0	10	0	30	13	1	One primary only	41	No radiation and/or cancer-directed surgery	None/Unknown	No/Unknown	No systemic therapy and/or surgical procedures	Dead (attributable to this cancer dx)	Alive or dead due to cancer	65	Dead
1175100	Married (including common law)	White	51	Female	2010	Sigmoid Colon	Moderately differentiated; Grade II	Positive histology	8140/3: Adenocarcinoma, NOS	Localized	T1	N0	M0	998	0	20	24	0	One primary only	30	No radiation and/or cancer-directed surgery	None/Unknown	No/Unknown	No systemic therapy and/or surgical procedures	Alive or dead of other cause	Alive or dead due to cancer	96	Alive
1175143	Married (including common law)	Other (American Indian/AK Native, Asian/Pacific Islander)	49	Male	2010	Rectum	Moderately differentiated; Grade II	Positive histology	8263/3: Adenocarcinoma in tubulovillous adenoma	Localized	T1	N0	M0	20	0	990	21	0	One primary only	30	Radiation prior to surgery	Beam radiation	Yes	Systemic therapy before surgery	Alive or dead of other cause	Alive or dead due to cancer	93	Alive
1175155	Married (including common law)	White	74	Female	2010	Cecum	Moderately differentiated; Grade II	Positive histology	8140/3: Adenocarcinoma, NOS	Distant	T3	N2	M1	998	0	65	17	5	One primary only	40	No radiation and/or cancer-directed surgery	None/Unknown	Yes	Systemic therapy after surgery	Dead (attributable to this cancer dx)	Alive or dead due to cancer	80	Dead
1175301	Single (never married)	Other (American Indian/AK Native, Asian/Pacific Islander)	67	Female	2010	Sigmoid Colon	Moderately differentiated; Grade II	Positive histology	8140/3: Adenocarcinoma, NOS	Distant	T4	N2	M0	999	0	80	16	13	One primary only	32	No radiation and/or cancer-directed surgery	None/Unknown	No/Unknown	No systemic therapy and/or surgical procedures	Alive or dead of other cause	Alive or dead due to cancer	106	Alive
1175313	Married (including common law)	White	71	Female	2010	Rectosigmoid Junction	Moderately differentiated; Grade II	Positive histology	8140/3: Adenocarcinoma, NOS	Distant	T3	N1	M1	999	3	35	12	3	One primary only	30	Radiation prior to surgery	Beam radiation	Yes	Systemic therapy before surgery	Dead (attributable to this cancer dx)	Alive or dead due to cancer	40	Dead
1175314	Married (including common law)	Other (American Indian/AK Native, Asian/Pacific Islander)	56	Female	2010	Ascending Colon	Moderately differentiated; Grade II	Positive histology	8140/3: Adenocarcinoma, NOS	Localized	T2	N0	M0	998	0	50	0	98	One primary only	40	No radiation and/or cancer-directed surgery	None/Unknown	No/Unknown	No systemic therapy and/or surgical procedures	Alive or dead of other cause	Alive or dead due to cancer	81	Alive
1175331	Widowed	White	85	Female	2010	Rectum	Well differentiated; Grade I	Positive histology	8140/3: Adenocarcinoma, NOS	Localized	T1	N0	M0	998	999	50	0	98	One primary only	0	No radiation and/or cancer-directed surgery	Beam radiation	No/Unknown	No systemic therapy and/or surgical procedures	Dead (attributable to this cancer dx)	Alive or dead due to cancer	63	Dead
1175505	Single (never married)	White	55	Male	2010	Rectum	Moderately differentiated; Grade II	Positive histology	8140/3: Adenocarcinoma, NOS	Localized	T3	N0	M0	20	0	90	3	0	One primary only	30	Radiation prior to surgery	Beam radiation	Yes	Systemic therapy before surgery	Alive or dead of other cause	Dead (attributable to causes other than this cancer dx)	42	Dead
1175549	Married (including common law)	White	32	Female	2010	Sigmoid Colon	Moderately differentiated; Grade II	Positive histology	8140/3: Adenocarcinoma, NOS	Distant	T3	N2	M1	10	990	37	14	8	One primary only	30	No radiation and/or cancer-directed surgery	None/Unknown	Yes	Systemic therapy after surgery	Dead (attributable to this cancer dx)	Alive or dead due to cancer	30	Dead
1175687	Married (including common law)	White	62	Male	2010	Ascending Colon	Moderately differentiated; Grade II	Positive histology	8140/3: Adenocarcinoma, NOS	Regional	T3	N1	M0	20	0	55	23	1	One primary only	30	No radiation and/or cancer-directed surgery	None/Unknown	Yes	Systemic therapy after surgery	Dead (attributable to this cancer dx)	Alive or dead due to cancer	64	Dead
1175728	Married (including common law)	Other (American Indian/AK Native, Asian/Pacific Islander)	61	Female	2010	Rectum	Moderately differentiated; Grade II	Positive histology	8263/3: Adenocarcinoma in tubulovillous adenoma	Localized	T1	N0	M0	999	999	999	0	98	One primary only	26	No radiation and/or cancer-directed surgery	None/Unknown	No/Unknown	No systemic therapy and/or surgical procedures	Alive or dead of other cause	Alive or dead due to cancer	97	Alive
1175748	Married (including common law)	White	44	Female	2010	Sigmoid Colon	Undifferentiated; anaplastic; Grade IV	Positive histology	8140/3: Adenocarcinoma, NOS	Distant	T3	N2	M1	999	990	50	34	29	One primary only	32	No radiation and/or cancer-directed surgery	None/Unknown	Yes	Systemic therapy after surgery	Dead (attributable to this cancer dx)	Alive or dead due to cancer	30	Dead
1175753	Widowed	White	83	Female	2010	Descending Colon	Moderately differentiated; Grade II	Positive histology	8140/3: Adenocarcinoma, NOS	Localized	T3	N0	M0	10	0	35	15	0	One primary only	30	No radiation and/or cancer-directed surgery	None/Unknown	No/Unknown	No systemic therapy and/or surgical procedures	Alive or dead of other cause	Alive or dead due to cancer	105	Alive
1175778	Married (including common law)	White	84	Male	2010	Sigmoid Colon	Moderately differentiated; Grade II	Positive histology	8140/3: Adenocarcinoma, NOS	Regional	T3	N0	M0	999	0	46	14	0	One primary only	30	No radiation and/or cancer-directed surgery	None/Unknown	No/Unknown	No systemic therapy and/or surgical procedures	Alive or dead of other cause	Dead (attributable to causes other than this cancer dx)	44	Dead
1175786	Single (never married)	Black	55	Male	2010	Rectosigmoid Junction	Moderately differentiated; Grade II	Positive histology	8210/3: Adenocarcinoma in adenomatous polyp	Localized	T1	N0	M0	998	0	999	53	0	One primary only	30	No radiation and/or cancer-directed surgery	None/Unknown	No/Unknown	No systemic therapy and/or surgical procedures	Alive or dead of other cause	Alive or dead due to cancer	101	Alive
1175829	Widowed	White	85	Female	2010	Transverse Colon	Moderately differentiated; Grade II	Positive histology	8140/3: Adenocarcinoma, NOS	Regional	T4	N1	M0	10	0	70	13	1	One primary only	30	No radiation and/or cancer-directed surgery	None/Unknown	No/Unknown	No systemic therapy and/or surgical procedures	Alive or dead of other cause	Dead (attributable to causes other than this cancer dx)	42	Dead
1175849	Widowed	White	85	Male	2010	Cecum	Poorly differentiated; Grade III	Positive histology	8140/3: Adenocarcinoma, NOS	Regional	T3	N2	M0	20	999	65	20	9	One primary only	40	No radiation and/or cancer-directed surgery	None/Unknown	No/Unknown	No systemic therapy and/or surgical procedures	Alive or dead of other cause	Dead (attributable to causes other than this cancer dx)	11	Dead
1175924	Married (including common law)	Other (American Indian/AK Native, Asian/Pacific Islander)	77	Male	2010	Ascending Colon	Moderately differentiated; Grade II	Positive histology	8140/3: Adenocarcinoma, NOS	Distant	T4	N2	M1	10	990	70	25	7	One primary only	40	No radiation and/or cancer-directed surgery	None/Unknown	Yes	Systemic therapy after surgery	Dead (attributable to this cancer dx)	Alive or dead due to cancer	2	Dead
1175928	Married (including common law)	Black	57	Male	2010	Sigmoid Colon	Moderately differentiated; Grade II	Positive histology	8140/3: Adenocarcinoma, NOS	Localized	T1	N0	M0	998	0	35	4	0	One primary only	40	No radiation and/or cancer-directed surgery	None/Unknown	No/Unknown	No systemic therapy and/or surgical procedures	Alive or dead of other cause	Alive or dead due to cancer	106	Alive
1175946	Widowed	Other (American Indian/AK Native, Asian/Pacific Islander)	79	Female	2010	Rectum	Moderately differentiated; Grade II	Positive histology	8140/3: Adenocarcinoma, NOS	Regional	T2	N1	M0	998	2	45	12	1	One primary only	30	Radiation after surgery	Beam radiation	Yes	Systemic therapy after surgery	Alive or dead of other cause	Alive or dead due to cancer	98	Alive
1175953	Married (including common law)	Other (American Indian/AK Native, Asian/Pacific Islander)	73	Female	2010	Rectum	Moderately differentiated; Grade II	Positive histology	8140/3: Adenocarcinoma, NOS	Regional	T2	N1	M0	20	0	43	11	1	One primary only	40	No radiation and/or cancer-directed surgery	None/Unknown	No/Unknown	No systemic therapy and/or surgical procedures	Alive or dead of other cause	Alive or dead due to cancer	91	Alive
1175960	Divorced	Other (American Indian/AK Native, Asian/Pacific Islander)	68	Male	2010	Splenic Flexure	Moderately differentiated; Grade II	Positive histology	8140/3: Adenocarcinoma, NOS	Localized	T3	N0	M0	999	1	999	5	0	One primary only	40	No radiation and/or cancer-directed surgery	None/Unknown	No/Unknown	No systemic therapy and/or surgical procedures	Alive or dead of other cause	Alive or dead due to cancer	98	Alive
1175982	Married (including common law)	Other (American Indian/AK Native, Asian/Pacific Islander)	79	Female	2010	Hepatic Flexure	Moderately differentiated; Grade II	Positive histology	8480/3: Mucinous adenocarcinoma	Regional	T3	N2	M0	20	2	29	9	4	One primary only	40	No radiation and/or cancer-directed surgery	None/Unknown	No/Unknown	No systemic therapy and/or surgical procedures	Dead (attributable to this cancer dx)	Alive or dead due to cancer	24	Dead
1175985	Married (including common law)	Other (American Indian/AK Native, Asian/Pacific Islander)	66	Male	2010	Transverse Colon	Moderately differentiated; Grade II	Positive histology	8140/3: Adenocarcinoma, NOS	Localized	T1	N0	M0	999	0	9	6	0	One primary only	30	No radiation and/or cancer-directed surgery	None/Unknown	No/Unknown	No systemic therapy and/or surgical procedures	Alive or dead of other cause	Alive or dead due to cancer	99	Alive
1176010	Divorced	White	40	Male	2010	Rectum	Moderately differentiated; Grade II	Positive histology	8140/3: Adenocarcinoma, NOS	Regional	T2	N1	M0	10	0	60	14	0	One primary only	30	Radiation prior to surgery	Beam radiation	Yes	Systemic therapy both before and after surgery	Alive or dead of other cause	Alive or dead due to cancer	96	Alive
1176016	Single (never married)	White	80	Female	2010	Cecum	Moderately differentiated; Grade II	Positive histology	8140/3: Adenocarcinoma, NOS	Regional	T3	N2	M0	10	2	40	18	10	One primary only	40	No radiation and/or cancer-directed surgery	None/Unknown	Yes	Systemic therapy after surgery	Dead (attributable to this cancer dx)	Alive or dead due to cancer	8	Dead
1176030	Married (including common law)	White	71	Female	2010	Ascending Colon	Poorly differentiated; Grade III	Positive histology	8140/3: Adenocarcinoma, NOS	Regional	T3	N0	M0	20	0	51	15	0	One primary only	40	No radiation and/or cancer-directed surgery	None/Unknown	No/Unknown	No systemic therapy and/or surgical procedures	Alive or dead of other cause	Alive or dead due to cancer	100	Alive
1176065	Widowed	Other (American Indian/AK Native, Asian/Pacific Islander)	71	Female	2010	Descending Colon	Moderately differentiated; Grade II	Positive histology	8140/3: Adenocarcinoma, NOS	Regional	T3	N1	M0	998	0	35	15	1	One primary only	40	No radiation and/or cancer-directed surgery	None/Unknown	Yes	Systemic therapy after surgery	Dead (attributable to this cancer dx)	Alive or dead due to cancer	59	Dead
1176092	Widowed	Other (American Indian/AK Native, Asian/Pacific Islander)	85	Female	2010	Ascending Colon	Poorly differentiated; Grade III	Positive histology	8140/3: Adenocarcinoma, NOS	Regional	T3	N1	M0	10	0	70	17	1	One primary only	32	No radiation and/or cancer-directed surgery	None/Unknown	Yes	Systemic therapy after surgery	Alive or dead of other cause	Alive or dead due to cancer	98	Alive
1176108	Married (including common law)	White	58	Male	2010	Rectum	Moderately differentiated; Grade II	Positive histology	8140/3: Adenocarcinoma, NOS	Localized	T3	N0	M0	20	0	30	6	0	One primary only	30	Radiation prior to surgery	Beam radiation	Yes	Systemic therapy before surgery	Alive or dead of other cause	Dead (attributable to causes other than this cancer dx)	75	Dead
1176146	Widowed	White	85	Male	2010	Transverse Colon	Moderately differentiated; Grade II	Positive histology	8140/3: Adenocarcinoma, NOS	Regional	T4	N1	M0	999	1	35	11	1	One primary only	40	No radiation and/or cancer-directed surgery	None/Unknown	No/Unknown	No systemic therapy and/or surgical procedures	Alive or dead of other cause	Dead (attributable to causes other than this cancer dx)	42	Dead
1176152	Widowed	White	81	Female	2010	Cecum	Moderately differentiated; Grade II	Positive histology	8140/3: Adenocarcinoma, NOS	Regional	T3	N1	M0	10	0	44	18	2	One primary only	30	No radiation and/or cancer-directed surgery	None/Unknown	Yes	Systemic therapy after surgery	Alive or dead of other cause	Dead (attributable to causes other than this cancer dx)	84	Dead
1176153	Married (including common law)	White	74	Male	2010	Ascending Colon	Moderately differentiated; Grade II	Positive histology	8480/3: Mucinous adenocarcinoma	Regional	T3	N2	M0	999	999	40	16	6	One primary only	40	No radiation and/or cancer-directed surgery	None/Unknown	No/Unknown	No systemic therapy and/or surgical procedures	Dead (attributable to this cancer dx)	Alive or dead due to cancer	14	Dead
1176160	Married (including common law)	White	55	Male	2010	Cecum	Moderately differentiated; Grade II	Positive histology	8140/3: Adenocarcinoma, NOS	Localized	T2	N0	M0	20	0	20	15	0	One primary only	40	No radiation and/or cancer-directed surgery	None/Unknown	No/Unknown	No systemic therapy and/or surgical procedures	Alive or dead of other cause	Alive or dead due to cancer	97	Alive
1176163	Married (including common law)	White	85	Female	2010	Sigmoid Colon	Well differentiated; Grade I	Positive histology	8480/3: Mucinous adenocarcinoma	Distant	T4	N0	M1	10	0	60	41	0	One primary only	30	No radiation and/or cancer-directed surgery	None/Unknown	No/Unknown	No systemic therapy and/or surgical procedures	Dead (attributable to this cancer dx)	Alive or dead due to cancer	14	Dead
1176215	Married (including common law)	Other (American Indian/AK Native, Asian/Pacific Islander)	50	Male	2010	Sigmoid Colon	Moderately differentiated; Grade II	Positive histology	8210/3: Adenocarcinoma in adenomatous polyp	Regional	T2	N1	M0	998	0	10	13	1	One primary only	30	No radiation and/or cancer-directed surgery	None/Unknown	Yes	Systemic therapy after surgery	Alive or dead of other cause	Alive or dead due to cancer	99	Alive
1176243	Married (including common law)	White	74	Male	2010	Cecum	Moderately differentiated; Grade II	Positive histology	8210/3: Adenocarcinoma in adenomatous polyp	Localized	T1	N0	M0	20	0	999	11	0	One primary only	40	No radiation and/or cancer-directed surgery	None/Unknown	No/Unknown	No systemic therapy and/or surgical procedures	Alive or dead of other cause	Alive or dead due to cancer	98	Alive
1176306	Single (never married)	White	60	Female	2010	Sigmoid Colon	Moderately differentiated; Grade II	Positive histology	8263/3: Adenocarcinoma in tubulovillous adenoma	Regional	T2	N1	M0	10	999	35	12	2	One primary only	40	Radiation after surgery	Beam radiation	Yes	Systemic therapy after surgery	Alive or dead of other cause	Alive or dead due to cancer	100	Alive
1176310	Married (including common law)	White	72	Male	2010	Rectum	Moderately differentiated; Grade II	Positive histology	8140/3: Adenocarcinoma, NOS	Localized	T2	N0	M0	999	999	60	0	98	One primary only	0	No radiation and/or cancer-directed surgery	Beam radiation	Yes	No systemic therapy and/or surgical procedures	Alive or dead of other cause	Dead (attributable to causes other than this cancer dx)	9	Dead
1176315	Married (including common law)	White	80	Male	2010	Sigmoid Colon	Moderately differentiated; Grade II	Positive histology	8140/3: Adenocarcinoma, NOS	Distant	T3	N0	M1	10	0	15	15	0	One primary only	30	No radiation and/or cancer-directed surgery	None/Unknown	Yes	Systemic therapy before surgery	Dead (attributable to this cancer dx)	Alive or dead due to cancer	61	Dead
1176330	Married (including common law)	White	50	Male	2010	Sigmoid Colon	Moderately differentiated; Grade II	Positive histology	8263/3: Adenocarcinoma in tubulovillous adenoma	Localized	T1	N0	M0	20	0	7	14	0	One primary only	30	No radiation and/or cancer-directed surgery	None/Unknown	No/Unknown	No systemic therapy and/or surgical procedures	Alive or dead of other cause	Alive or dead due to cancer	106	Alive
1176362	Single (never married)	White	58	Male	2010	Sigmoid Colon	Poorly differentiated; Grade III	Positive histology	8140/3: Adenocarcinoma, NOS	Regional	T4	N1	M0	10	0	35	14	1	One primary only	30	No radiation and/or cancer-directed surgery	None/Unknown	No/Unknown	No systemic therapy and/or surgical procedures	Dead (attributable to this cancer dx)	Alive or dead due to cancer	5	Dead
1176376	Single (never married)	Other (American Indian/AK Native, Asian/Pacific Islander)	83	Female	2010	Sigmoid Colon	Moderately differentiated; Grade II	Positive histology	8263/3: Adenocarcinoma in tubulovillous adenoma	Localized	T3	N0	M0	20	0	37	19	0	One primary only	30	No radiation and/or cancer-directed surgery	None/Unknown	No/Unknown	No systemic therapy and/or surgical procedures	Alive or dead of other cause	Dead (attributable to causes other than this cancer dx)	85	Dead
1176390	Married (including common law)	Other (American Indian/AK Native, Asian/Pacific Islander)	58	Male	2010	Descending Colon	Moderately differentiated; Grade II	Positive histology	8140/3: Adenocarcinoma, NOS	Localized	T2	N0	M0	20	0	36	14	0	One primary only	40	No radiation and/or cancer-directed surgery	None/Unknown	No/Unknown	No systemic therapy and/or surgical procedures	Dead (missing/unknown COD)	Dead (missing/unknown COD)	68	Dead
1176391	Widowed	White	83	Male	2010	Sigmoid Colon	Moderately differentiated; Grade II	Positive histology	8140/3: Adenocarcinoma, NOS	Localized	T3	N0	M0	998	0	70	13	0	One primary only	30	No radiation and/or cancer-directed surgery	None/Unknown	No/Unknown	No systemic therapy and/or surgical procedures	Dead (attributable to this cancer dx)	Alive or dead due to cancer	49	Dead
1176424	Single (never married)	White	50	Female	2010	Transverse Colon	Poorly differentiated; Grade III	Positive histology	8263/3: Adenocarcinoma in tubulovillous adenoma	Regional	T4	N2	M0	999	1	60	30	11	One primary only	30	No radiation and/or cancer-directed surgery	None/Unknown	Yes	Systemic therapy after surgery	Dead (attributable to this cancer dx)	Alive or dead due to cancer	20	Dead
1176480	Married (including common law)	White	60	Female	2010	Splenic Flexure	Moderately differentiated; Grade II	Positive histology	8140/3: Adenocarcinoma, NOS	Regional	T3	N1	M0	20	0	999	25	2	One primary only	40	No radiation and/or cancer-directed surgery	None/Unknown	Yes	Systemic therapy after surgery	Alive or dead of other cause	Alive or dead due to cancer	97	Alive
1176489	Unknown	Unknown	65	Female	2010	Sigmoid Colon	Well differentiated; Grade I	Positive histology	8263/3: Adenocarcinoma in tubulovillous adenoma	Localized	T1	N0	M0	998	0	12	0	98	One primary only	26	No radiation and/or cancer-directed surgery	None/Unknown	No/Unknown	No systemic therapy and/or surgical procedures	Alive or dead of other cause	Alive or dead due to cancer	97	Alive
1176517	Divorced	White	62	Male	2010	Sigmoid Colon	Moderately differentiated; Grade II	Positive histology	8140/3: Adenocarcinoma, NOS	Regional	T3	N0	M0	20	0	55	34	0	One primary only	30	No radiation and/or cancer-directed surgery	None/Unknown	No/Unknown	No systemic therapy and/or surgical procedures	Dead (attributable to this cancer dx)	Alive or dead due to cancer	25	Dead
1176556	Widowed	White	85	Female	2010	Ascending Colon	Moderately differentiated; Grade II	Positive histology	8140/3: Adenocarcinoma, NOS	Localized	T1	N0	M0	998	998	999	0	98	One primary only	0	No radiation and/or cancer-directed surgery	None/Unknown	No/Unknown	No systemic therapy and/or surgical procedures	Dead (attributable to this cancer dx)	Alive or dead due to cancer	0	Dead
1176557	Married (including common law)	White	34	Female	2010	Sigmoid Colon	Moderately differentiated; Grade II	Positive histology	8263/3: Adenocarcinoma in tubulovillous adenoma	Localized	T1	N0	M0	998	998	10	0	98	One primary only	29	No radiation and/or cancer-directed surgery	None/Unknown	No/Unknown	No systemic therapy and/or surgical procedures	Alive or dead of other cause	Alive or dead due to cancer	11	Alive
1176805	Married (including common law)	White	58	Female	2010	Cecum	Undifferentiated; anaplastic; Grade IV	Positive histology	8140/3: Adenocarcinoma, NOS	Distant	T4	N2	M1	10	7	72	21	14	One primary only	40	No radiation and/or cancer-directed surgery	None/Unknown	No/Unknown	No systemic therapy and/or surgical procedures	Dead (attributable to this cancer dx)	Alive or dead due to cancer	0	Dead
1176809	Single (never married)	White	57	Female	2010	Cecum	Poorly differentiated; Grade III	Positive histology	8480/3: Mucinous adenocarcinoma	Regional	T3	N2	M0	20	0	999	13	4	One primary only	70	No radiation and/or cancer-directed surgery	None/Unknown	Yes	Systemic therapy after surgery	Alive or dead of other cause	Alive or dead due to cancer	107	Alive
1176811	Married (including common law)	White	58	Male	2010	Hepatic Flexure	Moderately differentiated; Grade II	Positive histology	8140/3: Adenocarcinoma, NOS	Distant	T3	N2	M1	998	1	40	25	4	One primary only	50	No radiation and/or cancer-directed surgery	None/Unknown	Yes	Systemic therapy after surgery	Dead (attributable to this cancer dx)	Alive or dead due to cancer	31	Dead
1176883	Married (including common law)	White	85	Male	2010	Splenic Flexure	Moderately differentiated; Grade II	Positive histology	8140/3: Adenocarcinoma, NOS	Localized	T1	N0	M0	20	0	999	0	98	One primary only	0	No radiation and/or cancer-directed surgery	None/Unknown	No/Unknown	No systemic therapy and/or surgical procedures	Alive or dead of other cause	Dead (attributable to causes other than this cancer dx)	3	Dead
1176996	Divorced	White	63	Male	2010	Sigmoid Colon	Poorly differentiated; Grade III	Positive histology	8481/3: Mucin-producing adenocarcinoma	Distant	T4	N0	M1	10	990	30	7	0	One primary only	50	No radiation and/or cancer-directed surgery	None/Unknown	Yes	Systemic therapy after surgery	Dead (attributable to this cancer dx)	Alive or dead due to cancer	3	Dead
1177017	Single (never married)	Other (American Indian/AK Native, Asian/Pacific Islander)	81	Female	2010	Hepatic Flexure	Poorly differentiated; Grade III	Positive histology	8140/3: Adenocarcinoma, NOS	Regional	T4	N1	M0	998	0	30	8	1	One primary only	30	No radiation and/or cancer-directed surgery	None/Unknown	No/Unknown	No systemic therapy and/or surgical procedures	Alive or dead of other cause	Alive or dead due to cancer	100	Alive
1177020	Widowed	White	85	Female	2010	Cecum	Moderately differentiated; Grade II	Positive histology	8480/3: Mucinous adenocarcinoma	Distant	T4	N2	M1	998	990	50	9	8	One primary only	70	No radiation and/or cancer-directed surgery	None/Unknown	No/Unknown	No systemic therapy and/or surgical procedures	Dead (attributable to this cancer dx)	Alive or dead due to cancer	2	Dead
1177022	Widowed	White	79	Female	2010	Cecum	Well differentiated; Grade I	Positive histology	8140/3: Adenocarcinoma, NOS	Localized	T3	N0	M0	998	0	13	13	0	One primary only	40	No radiation and/or cancer-directed surgery	None/Unknown	No/Unknown	No systemic therapy and/or surgical procedures	Dead (attributable to this cancer dx)	Alive or dead due to cancer	0	Dead
1177024	Single (never married)	White	62	Male	2010	Sigmoid Colon	Moderately differentiated; Grade II	Positive histology	8263/3: Adenocarcinoma in tubulovillous adenoma	Localized	T2	N0	M0	998	0	50	17	0	One primary only	30	No radiation and/or cancer-directed surgery	None/Unknown	No/Unknown	No systemic therapy and/or surgical procedures	Alive or dead of other cause	Alive or dead due to cancer	98	Alive
1177025	Divorced	White	63	Male	2010	Ascending Colon	Poorly differentiated; Grade III	Positive histology	8480/3: Mucinous adenocarcinoma	Regional	T3	N2	M0	20	0	40	18	5	One primary only	40	No radiation and/or cancer-directed surgery	None/Unknown	Yes	Systemic therapy after surgery	Alive or dead of other cause	Alive or dead due to cancer	98	Alive
1177026	Divorced	White	81	Female	2010	Hepatic Flexure	Well differentiated; Grade I	Positive histology	8140/3: Adenocarcinoma, NOS	Localized	T1	N0	M0	20	0	15	12	0	One primary only	40	No radiation and/or cancer-directed surgery	None/Unknown	No/Unknown	No systemic therapy and/or surgical procedures	Alive or dead of other cause	Alive or dead due to cancer	99	Alive
1177027	Married (including common law)	White	79	Male	2010	Cecum	Moderately differentiated; Grade II	Positive histology	8263/3: Adenocarcinoma in tubulovillous adenoma	Regional	T4	N0	M0	10	0	21	0	98	One primary only	40	No radiation and/or cancer-directed surgery	None/Unknown	No/Unknown	No systemic therapy and/or surgical procedures	Alive or dead of other cause	Dead (attributable to causes other than this cancer dx)	4	Dead
1177031	Married (including common law)	White	50	Male	2010	Rectum	Well differentiated; Grade I	Positive histology	8261/3: Adenocarcinoma in villous adenoma	Localized	T1	N0	M0	998	0	24	13	0	One primary only	30	No radiation and/or cancer-directed surgery	None/Unknown	No/Unknown	No systemic therapy and/or surgical procedures	Alive or dead of other cause	Alive or dead due to cancer	105	Alive
1177132	Married (including common law)	White	62	Male	2010	Cecum	Well differentiated; Grade I	Positive histology	8480/3: Mucinous adenocarcinoma	Localized	T3	N0	M0	10	999	75	20	0	One primary only	40	No radiation and/or cancer-directed surgery	None/Unknown	No/Unknown	No systemic therapy and/or surgical procedures	Alive or dead of other cause	Alive or dead due to cancer	105	Alive
1177143	Single (never married)	White	64	Male	2010	Rectosigmoid Junction	Moderately differentiated; Grade II	Positive histology	8140/3: Adenocarcinoma, NOS	Regional	T3	N1	M0	10	0	18	17	3	One primary only	30	Radiation prior to surgery	Beam radiation	Yes	Systemic therapy before surgery	Alive or dead of other cause	Dead (attributable to causes other than this cancer dx)	60	Dead
1177154	Married (including common law)	White	54	Male	2010	Sigmoid Colon	Moderately differentiated; Grade II	Positive histology	8140/3: Adenocarcinoma, NOS	Localized	T2	N0	M0	998	0	20	12	0	One primary only	30	No radiation and/or cancer-directed surgery	None/Unknown	No/Unknown	No systemic therapy and/or surgical procedures	Alive or dead of other cause	Alive or dead due to cancer	107	Alive
1177233	Unknown	White	55	Female	2010	Rectum	Moderately differentiated; Grade II	Positive histology	8140/3: Adenocarcinoma, NOS	Regional	T3	N2	M0	998	1	30	15	11	One primary only	30	Radiation after surgery	Beam radiation	Yes	Systemic therapy after surgery	Dead (attributable to this cancer dx)	Alive or dead due to cancer	58	Dead
1177236	Single (never married)	Unknown	44	Female	2010	Rectosigmoid Junction	Moderately differentiated; Grade II	Positive histology	8140/3: Adenocarcinoma, NOS	Localized	T3	N0	M0	10	0	55	25	0	One primary only	30	No radiation and/or cancer-directed surgery	None/Unknown	No/Unknown	No systemic therapy and/or surgical procedures	Alive or dead of other cause	Alive or dead due to cancer	104	Alive
1177248	Married (including common law)	White	53	Male	2010	Sigmoid Colon	Moderately differentiated; Grade II	Positive histology	8140/3: Adenocarcinoma, NOS	Distant	T4	N1	M1	10	0	40	2	1	One primary only	30	No radiation and/or cancer-directed surgery	None/Unknown	No/Unknown	No systemic therapy and/or surgical procedures	Alive or dead of other cause	Alive or dead due to cancer	10	Alive
1177256	Unknown	White	45	Male	2010	Cecum	Moderately differentiated; Grade II	Positive histology	8140/3: Adenocarcinoma, NOS	Regional	T3	N2	M0	20	0	50	33	4	One primary only	40	No radiation and/or cancer-directed surgery	None/Unknown	Yes	Systemic therapy after surgery	Dead (attributable to this cancer dx)	Alive or dead due to cancer	64	Dead
1177320	Married (including common law)	White	50	Female	2010	Rectum	Moderately differentiated; Grade II	Positive histology	8140/3: Adenocarcinoma, NOS	Regional	T4	N2	M0	20	990	30	9	4	One primary only	30	Radiation prior to surgery	Beam radiation	Yes	Systemic therapy before surgery	Dead (attributable to this cancer dx)	Alive or dead due to cancer	38	Dead
1177327	Divorced	White	46	Female	2010	Sigmoid Colon	Moderately differentiated; Grade II	Positive histology	8140/3: Adenocarcinoma, NOS	Regional	T3	N1	M0	20	0	38	13	1	One primary only	30	No radiation and/or cancer-directed surgery	None/Unknown	Yes	Systemic therapy after surgery	Alive or dead of other cause	Alive or dead due to cancer	97	Alive
1177335	Married (including common law)	White	49	Female	2010	Rectum	Moderately differentiated; Grade II	Positive histology	8140/3: Adenocarcinoma, NOS	Regional	T3	N1	M0	20	0	40	12	1	One primary only	30	Radiation prior to surgery	Beam radiation	Yes	Systemic therapy before surgery	Alive or dead of other cause	Alive or dead due to cancer	97	Alive
1177346	Married (including common law)	White	47	Male	2010	Appendix	Moderately differentiated; Grade II	Positive histology	8140/3: Adenocarcinoma, NOS	Localized	T3	N0	M0	999	0	40	17	0	One primary only	40	No radiation and/or cancer-directed surgery	None/Unknown	No/Unknown	No systemic therapy and/or surgical procedures	Alive or dead of other cause	Alive or dead due to cancer	97	Alive
1177401	Widowed	White	85	Female	2010	Cecum	Moderately differentiated; Grade II	Positive histology	8263/3: Adenocarcinoma in tubulovillous adenoma	Distant	T3	N0	M1	10	2	47	22	0	One primary only	41	No radiation and/or cancer-directed surgery	None/Unknown	No/Unknown	No systemic therapy and/or surgical procedures	Dead (attributable to this cancer dx)	Alive or dead due to cancer	17	Dead
1177522	Married (including common law)	White	59	Female	2010	Sigmoid Colon	Moderately differentiated; Grade II	Positive histology	8210/3: Adenocarcinoma in adenomatous polyp	Localized	T1	N0	M0	998	0	999	0	98	One primary only	26	No radiation and/or cancer-directed surgery	None/Unknown	No/Unknown	No systemic therapy and/or surgical procedures	Alive or dead of other cause	Alive or dead due to cancer	94	Alive
1177532	Married (including common law)	White	81	Female	2010	Ascending Colon	Moderately differentiated; Grade II	Positive histology	8140/3: Adenocarcinoma, NOS	Regional	T3	N0	M0	20	0	55	17	0	One primary only	40	No radiation and/or cancer-directed surgery	None/Unknown	No/Unknown	No systemic therapy and/or surgical procedures	Alive or dead of other cause	Dead (attributable to causes other than this cancer dx)	62	Dead
1177609	Married (including common law)	Other (American Indian/AK Native, Asian/Pacific Islander)	61	Female	2010	Rectosigmoid Junction	Moderately differentiated; Grade II	Positive histology	8140/3: Adenocarcinoma, NOS	Distant	T3	N1	M1	10	1	17	7	3	One primary only	30	No radiation and/or cancer-directed surgery	None/Unknown	Yes	Systemic therapy after surgery	Alive or dead of other cause	Alive or dead due to cancer	98	Alive
1177612	Married (including common law)	Other (American Indian/AK Native, Asian/Pacific Islander)	63	Male	2010	Rectosigmoid Junction	Moderately differentiated; Grade II	Positive histology	8140/3: Adenocarcinoma, NOS	Regional	T3	N0	M0	998	0	47	17	0	One primary only	30	No radiation and/or cancer-directed surgery	None/Unknown	No/Unknown	No systemic therapy and/or surgical procedures	Dead (attributable to this cancer dx)	Alive or dead due to cancer	87	Dead
1177632	Single (never married)	Other (American Indian/AK Native, Asian/Pacific Islander)	85	Male	2010	Transverse Colon	Moderately differentiated; Grade II	Positive histology	8140/3: Adenocarcinoma, NOS	Localized	T1	N0	M0	998	999	999	0	98	One primary only	0	No radiation and/or cancer-directed surgery	None/Unknown	No/Unknown	No systemic therapy and/or surgical procedures	Dead (attributable to this cancer dx)	Alive or dead due to cancer	28	Dead
1177634	Married (including common law)	Black	65	Female	2010	Cecum	Moderately differentiated; Grade II	Positive histology	8140/3: Adenocarcinoma, NOS	Regional	T2	N1	M0	999	0	50	36	1	One primary only	40	No radiation and/or cancer-directed surgery	None/Unknown	Yes	Systemic therapy after surgery	Alive or dead of other cause	Alive or dead due to cancer	99	Alive
1177666	Married (including common law)	White	61	Male	2010	Cecum	Well differentiated; Grade I	Positive histology	8263/3: Adenocarcinoma in tubulovillous adenoma	Localized	T1	N0	M0	998	0	990	17	0	One primary only	40	No radiation and/or cancer-directed surgery	None/Unknown	No/Unknown	No systemic therapy and/or surgical procedures	Dead (attributable to this cancer dx)	Alive or dead due to cancer	76	Dead
1177678	Married (including common law)	White	43	Female	2010	Cecum	Moderately differentiated; Grade II	Positive histology	8140/3: Adenocarcinoma, NOS	Localized	T3	N0	M0	998	0	60	16	0	One primary only	40	No radiation and/or cancer-directed surgery	None/Unknown	Yes	Systemic therapy after surgery	Alive or dead of other cause	Alive or dead due to cancer	106	Alive
1177703	Single (never married)	Black	64	Male	2010	Appendix	Undifferentiated; anaplastic; Grade IV	Positive histology	8490/3: Signet ring cell carcinoma	Distant	T4	N2	M1	10	990	70	8	5	One primary only	40	No radiation and/or cancer-directed surgery	None/Unknown	Yes	Systemic therapy after surgery	Dead (attributable to this cancer dx)	Alive or dead due to cancer	12	Dead
1177706	Married (including common law)	Other (American Indian/AK Native, Asian/Pacific Islander)	85	Male	2010	Ascending Colon	Moderately differentiated; Grade II	Positive histology	8140/3: Adenocarcinoma, NOS	Localized	T3	N0	M0	10	0	52	12	0	One primary only	40	No radiation and/or cancer-directed surgery	None/Unknown	No/Unknown	No systemic therapy and/or surgical procedures	Dead (attributable to this cancer dx)	Alive or dead due to cancer	0	Dead
1177710	Single (never married)	White	67	Female	2010	Ascending Colon	Moderately differentiated; Grade II	Positive histology	8140/3: Adenocarcinoma, NOS	Localized	T2	N0	M0	999	0	25	18	0	One primary only	40	No radiation and/or cancer-directed surgery	None/Unknown	No/Unknown	No systemic therapy and/or surgical procedures	Alive or dead of other cause	Alive or dead due to cancer	96	Alive
1177713	Married (including common law)	White	80	Female	2010	Ascending Colon	Poorly differentiated; Grade III	Positive histology	8490/3: Signet ring cell carcinoma	Distant	T4	N0	M0	10	0	90	20	0	One primary only	41	No radiation and/or cancer-directed surgery	None/Unknown	No/Unknown	No systemic therapy and/or surgical procedures	Dead (attributable to this cancer dx)	Alive or dead due to cancer	4	Dead
1177737	Married (including common law)	White	60	Male	2010	Ascending Colon	Moderately differentiated; Grade II	Positive histology	8210/3: Adenocarcinoma in adenomatous polyp	Localized	T2	N0	M0	998	1	10	10	0	One primary only	40	No radiation and/or cancer-directed surgery	None/Unknown	No/Unknown	No systemic therapy and/or surgical procedures	Alive or dead of other cause	Alive or dead due to cancer	100	Alive
1177826	Single (never married)	White	41	Male	2010	Rectum	Moderately differentiated; Grade II	Positive histology	8263/3: Adenocarcinoma in tubulovillous adenoma	Localized	T1	N0	M0	998	0	20	0	98	One primary only	27	Radiation after surgery	Beam radiation	Yes	Systemic therapy after surgery	Dead (attributable to this cancer dx)	Alive or dead due to cancer	4	Dead
1177839	Single (never married)	White	74	Female	2010	Rectum	Moderately differentiated; Grade II	Positive histology	8140/3: Adenocarcinoma, NOS	Regional	T3	N1	M0	998	0	43	9	0	One primary only	30	Radiation prior to surgery	Beam radiation	Yes	Systemic therapy before surgery	Dead (attributable to this cancer dx)	Alive or dead due to cancer	13	Dead
1177854	Divorced	Other (American Indian/AK Native, Asian/Pacific Islander)	73	Female	2010	Ascending Colon	Moderately differentiated; Grade II	Positive histology	8140/3: Adenocarcinoma, NOS	Localized	T3	N0	M0	998	0	27	20	0	One primary only	40	No radiation and/or cancer-directed surgery	None/Unknown	No/Unknown	No systemic therapy and/or surgical procedures	Alive or dead of other cause	Alive or dead due to cancer	97	Alive
1177897	Married (including common law)	White	81	Male	2010	Sigmoid Colon	Moderately differentiated; Grade II	Positive histology	8480/3: Mucinous adenocarcinoma	Regional	T3	N0	M0	998	0	45	14	0	One primary only	30	No radiation and/or cancer-directed surgery	None/Unknown	No/Unknown	No systemic therapy and/or surgical procedures	Dead (attributable to this cancer dx)	Alive or dead due to cancer	34	Dead
1177957	Married (including common law)	Other (American Indian/AK Native, Asian/Pacific Islander)	80	Male	2010	Sigmoid Colon	Moderately differentiated; Grade II	Positive histology	8210/3: Adenocarcinoma in adenomatous polyp	Localized	T1	N0	M0	10	999	999	0	98	One primary only	0	No radiation and/or cancer-directed surgery	None/Unknown	No/Unknown	No systemic therapy and/or surgical procedures	Alive or dead of other cause	Dead (attributable to causes other than this cancer dx)	2	Dead
1177962	Widowed	Other (American Indian/AK Native, Asian/Pacific Islander)	85	Female	2010	Hepatic Flexure	Moderately differentiated; Grade II	Positive histology	8140/3: Adenocarcinoma, NOS	Localized	T3	N0	M0	20	0	13	3	0	One primary only	30	No radiation and/or cancer-directed surgery	None/Unknown	No/Unknown	No systemic therapy and/or surgical procedures	Alive or dead of other cause	Dead (attributable to causes other than this cancer dx)	90	Dead
1177968	Married (including common law)	Other (American Indian/AK Native, Asian/Pacific Islander)	53	Female	2010	Sigmoid Colon	Moderately differentiated; Grade II	Positive histology	8140/3: Adenocarcinoma, NOS	Localized	T1	N0	M0	20	0	32	7	0	One primary only	30	No radiation and/or cancer-directed surgery	None/Unknown	No/Unknown	No systemic therapy and/or surgical procedures	Alive or dead of other cause	Alive or dead due to cancer	96	Alive
1177973	Married (including common law)	Other (American Indian/AK Native, Asian/Pacific Islander)	85	Male	2010	Sigmoid Colon	Moderately differentiated; Grade II	Positive histology	8210/3: Adenocarcinoma in adenomatous polyp	Localized	T1	N0	M0	998	0	25	5	0	One primary only	30	No radiation and/or cancer-directed surgery	None/Unknown	No/Unknown	No systemic therapy and/or surgical procedures	Alive or dead of other cause	Dead (attributable to causes other than this cancer dx)	23	Dead
1177979	Single (never married)	Other (American Indian/AK Native, Asian/Pacific Islander)	85	Female	2010	Sigmoid Colon	Moderately differentiated; Grade II	Positive histology	8140/3: Adenocarcinoma, NOS	Regional	T3	N1	M0	20	0	40	7	1	One primary only	30	No radiation and/or cancer-directed surgery	None/Unknown	No/Unknown	No systemic therapy and/or surgical procedures	Dead (attributable to this cancer dx)	Alive or dead due to cancer	0	Dead
1177981	Widowed	Other (American Indian/AK Native, Asian/Pacific Islander)	78	Female	2010	Hepatic Flexure	Moderately differentiated; Grade II	Positive histology	8140/3: Adenocarcinoma, NOS	Regional	T3	N0	M0	10	1	65	8	0	One primary only	30	No radiation and/or cancer-directed surgery	None/Unknown	No/Unknown	No systemic therapy and/or surgical procedures	Dead (attributable to this cancer dx)	Alive or dead due to cancer	18	Dead
1177988	Widowed	White	82	Female	2010	Rectum	Moderately differentiated; Grade II	Positive histology	8140/3: Adenocarcinoma, NOS	Localized	T1	N0	M0	20	0	38	0	98	One primary only	27	No radiation and/or cancer-directed surgery	None/Unknown	No/Unknown	No systemic therapy and/or surgical procedures	Alive or dead of other cause	Alive or dead due to cancer	96	Alive
1178048	Married (including common law)	White	83	Female	2010	Rectosigmoid Junction	Moderately differentiated; Grade II	Positive histology	8140/3: Adenocarcinoma, NOS	Regional	T3	N1	M0	10	0	35	19	1	One primary only	30	No radiation and/or cancer-directed surgery	None/Unknown	Yes	Systemic therapy after surgery	Alive or dead of other cause	Alive or dead due to cancer	100	Alive
1178064	Married (including common law)	Other (American Indian/AK Native, Asian/Pacific Islander)	76	Female	2010	Ascending Colon	Moderately differentiated; Grade II	Positive histology	8261/3: Adenocarcinoma in villous adenoma	Regional	T3	N0	M0	999	0	50	4	0	One primary only	40	No radiation and/or cancer-directed surgery	None/Unknown	No/Unknown	No systemic therapy and/or surgical procedures	Alive or dead of other cause	Alive or dead due to cancer	104	Alive
1178239	Married (including common law)	Other (American Indian/AK Native, Asian/Pacific Islander)	55	Female	2010	Splenic Flexure	Moderately differentiated; Grade II	Positive histology	8263/3: Adenocarcinoma in tubulovillous adenoma	Regional	T3	N1	M0	20	0	25	13	2	One primary only	30	No radiation and/or cancer-directed surgery	None/Unknown	Yes	Systemic therapy after surgery	Alive or dead of other cause	Alive or dead due to cancer	98	Alive
1178245	Married (including common law)	White	62	Female	2010	Cecum	Moderately differentiated; Grade II	Positive histology	8140/3: Adenocarcinoma, NOS	Regional	T3	N0	M0	20	0	12	15	0	One primary only	40	No radiation and/or cancer-directed surgery	None/Unknown	No/Unknown	No systemic therapy and/or surgical procedures	Alive or dead of other cause	Alive or dead due to cancer	99	Alive
1178268	Widowed	Black	63	Female	2010	Ascending Colon	Moderately differentiated; Grade II	Positive histology	8263/3: Adenocarcinoma in tubulovillous adenoma	Localized	T1	N0	M0	20	0	10	19	0	One primary only	40	No radiation and/or cancer-directed surgery	None/Unknown	No/Unknown	No systemic therapy and/or surgical procedures	Alive or dead of other cause	Alive or dead due to cancer	98	Alive
1178282	Single (never married)	White	57	Male	2010	Rectum	Moderately differentiated; Grade II	Positive histology	8140/3: Adenocarcinoma, NOS	Regional	T3	N1	M0	20	0	50	12	2	One primary only	30	Radiation after surgery	Beam radiation	Yes	Systemic therapy after surgery	Alive or dead of other cause	Alive or dead due to cancer	97	Alive
1178303	Married (including common law)	White	73	Male	2010	Cecum	Moderately differentiated; Grade II	Positive histology	8263/3: Adenocarcinoma in tubulovillous adenoma	Localized	T1	N0	M0	998	0	990	18	99	One primary only	40	No radiation and/or cancer-directed surgery	None/Unknown	No/Unknown	No systemic therapy and/or surgical procedures	Alive or dead of other cause	Alive or dead due to cancer	97	Alive
1178319	Divorced	White	72	Male	2010	Transverse Colon	Moderately differentiated; Grade II	Positive histology	8140/3: Adenocarcinoma, NOS	Localized	T3	N0	M0	998	0	30	7	0	One primary only	40	No radiation and/or cancer-directed surgery	None/Unknown	No/Unknown	No systemic therapy and/or surgical procedures	Alive or dead of other cause	Alive or dead due to cancer	96	Alive
1178326	Married (including common law)	White	53	Male	2010	Sigmoid Colon	Well differentiated; Grade I	Positive histology	8261/3: Adenocarcinoma in villous adenoma	Localized	T1	N0	M0	20	0	999	22	0	One primary only	30	No radiation and/or cancer-directed surgery	None/Unknown	No/Unknown	No systemic therapy and/or surgical procedures	Alive or dead of other cause	Alive or dead due to cancer	97	Alive
1178369	Married (including common law)	Other (American Indian/AK Native, Asian/Pacific Islander)	56	Male	2010	Appendix	Undifferentiated; anaplastic; Grade IV	Positive histology	8480/3: Mucinous adenocarcinoma	Distant	T3	N2	M1	10	990	999	98	97	One primary only	70	No radiation and/or cancer-directed surgery	None/Unknown	Yes	Systemic therapy after surgery	Dead (attributable to this cancer dx)	Alive or dead due to cancer	37	Dead
1178411	Married (including common law)	White	59	Female	2010	Transverse Colon	Poorly differentiated; Grade III	Positive histology	8140/3: Adenocarcinoma, NOS	Regional	T3	N0	M0	10	0	44	13	0	One primary only	40	No radiation and/or cancer-directed surgery	None/Unknown	No/Unknown	No systemic therapy and/or surgical procedures	Dead (attributable to this cancer dx)	Alive or dead due to cancer	70	Dead
1178468	Married (including common law)	White	75	Female	2010	Ascending Colon	Moderately differentiated; Grade II	Positive histology	8480/3: Mucinous adenocarcinoma	Localized	T3	N0	M0	20	0	55	36	0	One primary only	40	No radiation and/or cancer-directed surgery	None/Unknown	No/Unknown	No systemic therapy and/or surgical procedures	Alive or dead of other cause	Alive or dead due to cancer	90	Alive
1178514	Married (including common law)	Other (American Indian/AK Native, Asian/Pacific Islander)	52	Male	2010	Rectum	Moderately differentiated; Grade II	Positive histology	8263/3: Adenocarcinoma in tubulovillous adenoma	Regional	T3	N2	M0	10	0	30	17	4	One primary only	30	Radiation prior to surgery	Beam radiation	Yes	Systemic therapy before surgery	Alive or dead of other cause	Alive or dead due to cancer	67	Alive
1178517	Married (including common law)	White	54	Female	2010	Rectum	Moderately differentiated; Grade II	Positive histology	8140/3: Adenocarcinoma, NOS	Distant	T3	N1	M1	10	0	7	22	2	One primary only	30	Radiation prior to surgery	Beam radiation	Yes	Systemic therapy both before and after surgery	Dead (attributable to this cancer dx)	Alive or dead due to cancer	23	Dead
1178522	Unknown	White	41	Male	2010	Cecum	Moderately differentiated; Grade II	Positive histology	8480/3: Mucinous adenocarcinoma	Regional	T3	N2	M0	20	999	36	24	5	One primary only	40	No radiation and/or cancer-directed surgery	None/Unknown	Yes	Systemic therapy after surgery	Alive or dead of other cause	Alive or dead due to cancer	96	Alive
1178534	Unknown	White	74	Male	2010	Transverse Colon	Moderately differentiated; Grade II	Positive histology	8140/3: Adenocarcinoma, NOS	Distant	T3	N2	M1	10	990	50	7	6	One primary only	30	No radiation and/or cancer-directed surgery	None/Unknown	Yes	Systemic therapy after surgery	Dead (attributable to this cancer dx)	Alive or dead due to cancer	15	Dead
1178599	Married (including common law)	Other (American Indian/AK Native, Asian/Pacific Islander)	43	Male	2010	Sigmoid Colon	Well differentiated; Grade I	Positive histology	8140/3: Adenocarcinoma, NOS	Distant	T4	N1	M1	20	999	100	10	2	One primary only	30	No radiation and/or cancer-directed surgery	None/Unknown	Yes	Systemic therapy after surgery	Dead (attributable to this cancer dx)	Alive or dead due to cancer	40	Dead
1178602	Divorced	Other (American Indian/AK Native, Asian/Pacific Islander)	41	Female	2010	Sigmoid Colon	Poorly differentiated; Grade III	Positive histology	8140/3: Adenocarcinoma, NOS	Regional	T4	N2	M0	20	0	76	12	4	One primary only	30	No radiation and/or cancer-directed surgery	None/Unknown	Yes	Systemic therapy after surgery	Alive or dead of other cause	Alive or dead due to cancer	97	Alive
1178627	Widowed	White	79	Male	2010	Rectum	Well differentiated; Grade I	Positive histology	8210/3: Adenocarcinoma in adenomatous polyp	Regional	T3	N0	M0	20	0	40	12	0	One primary only	30	Radiation before and after surgery	Beam radiation	Yes	Systemic therapy both before and after surgery	Alive or dead of other cause	Alive or dead due to cancer	96	Alive
1178660	Divorced	Other (American Indian/AK Native, Asian/Pacific Islander)	51	Female	2010	Transverse Colon	Moderately differentiated; Grade II	Positive histology	8140/3: Adenocarcinoma, NOS	Regional	T3	N1	M0	10	0	70	19	97	One primary only	40	No radiation and/or cancer-directed surgery	None/Unknown	Yes	Systemic therapy after surgery	Alive or dead of other cause	Alive or dead due to cancer	98	Alive
1178720	Married (including common law)	Other (American Indian/AK Native, Asian/Pacific Islander)	47	Female	2010	Transverse Colon	Moderately differentiated; Grade II	Positive histology	8140/3: Adenocarcinoma, NOS	Regional	T3	N1	M0	20	0	21	8	1	One primary only	30	No radiation and/or cancer-directed surgery	None/Unknown	Yes	Systemic therapy after surgery	Alive or dead of other cause	Alive or dead due to cancer	100	Alive
1178721	Single (never married)	White	72	Male	2010	Descending Colon	Undifferentiated; anaplastic; Grade IV	Positive histology	8140/3: Adenocarcinoma, NOS	Regional	T3	N2	M0	10	990	30	8	4	One primary only	40	No radiation and/or cancer-directed surgery	None/Unknown	Yes	Systemic therapy after surgery	Alive or dead of other cause	Dead (attributable to causes other than this cancer dx)	16	Dead
1178724	Widowed	White	85	Female	2010	Sigmoid Colon	Moderately differentiated; Grade II	Positive histology	8140/3: Adenocarcinoma, NOS	Regional	T3	N1	M0	998	2	27	17	1	One primary only	30	No radiation and/or cancer-directed surgery	None/Unknown	No/Unknown	No systemic therapy and/or surgical procedures	Dead (attributable to this cancer dx)	Alive or dead due to cancer	4	Dead
1178726	Married (including common law)	White	72	Male	2010	Rectum	Poorly differentiated; Grade III	Positive histology	8140/3: Adenocarcinoma, NOS	Regional	T3	N1	M0	10	0	50	19	0	One primary only	30	Radiation prior to surgery	Beam radiation	Yes	Systemic therapy before surgery	Alive or dead of other cause	Alive or dead due to cancer	98	Alive
1178738	Single (never married)	White	83	Female	2010	Rectosigmoid Junction	Moderately differentiated; Grade II	Positive histology	8140/3: Adenocarcinoma, NOS	Regional	T4	N1	M0	998	0	999	23	1	One primary only	30	No radiation and/or cancer-directed surgery	None/Unknown	Yes	Systemic therapy after surgery	Dead (attributable to this cancer dx)	Alive or dead due to cancer	22	Dead
1178765	Married (including common law)	White	62	Male	2010	Cecum	Poorly differentiated; Grade III	Positive histology	8263/3: Adenocarcinoma in tubulovillous adenoma	Regional	T4	N2	M0	10	990	50	25	5	One primary only	40	No radiation and/or cancer-directed surgery	None/Unknown	Yes	Systemic therapy after surgery	Alive or dead of other cause	Alive or dead due to cancer	98	Alive
1178768	Married (including common law)	White	63	Male	2010	Cecum	Moderately differentiated; Grade II	Positive histology	8263/3: Adenocarcinoma in tubulovillous adenoma	Regional	T1	N1	M0	20	0	7	12	2	One primary only	40	No radiation and/or cancer-directed surgery	None/Unknown	Yes	Systemic therapy after surgery	Alive or dead of other cause	Alive or dead due to cancer	98	Alive
1178776	Married (including common law)	White	50	Female	2010	Rectum	Moderately differentiated; Grade II	Positive histology	8140/3: Adenocarcinoma, NOS	Localized	T1	N0	M0	20	0	30	17	0	One primary only	30	No radiation and/or cancer-directed surgery	None/Unknown	No/Unknown	No systemic therapy and/or surgical procedures	Alive or dead of other cause	Alive or dead due to cancer	103	Alive
1178778	Single (never married)	White	35	Female	2010	Rectum	Moderately differentiated; Grade II	Positive histology	8221/3: Adenocarcinoma in multiple adenomatous polyps	Distant	T3	N2	M1	10	6	998	25	8	One primary only	60	Radiation prior to surgery	Beam radiation	Yes	Systemic therapy after surgery	Dead (attributable to this cancer dx)	Alive or dead due to cancer	20	Dead
1178781	Widowed	White	77	Female	2010	Hepatic Flexure	Moderately differentiated; Grade II	Positive histology	8140/3: Adenocarcinoma, NOS	Distant	T3	N2	M1	20	990	19	23	4	One primary only	41	No radiation and/or cancer-directed surgery	None/Unknown	No/Unknown	No systemic therapy and/or surgical procedures	Dead (attributable to this cancer dx)	Alive or dead due to cancer	16	Dead
1178968	Married (including common law)	Other (American Indian/AK Native, Asian/Pacific Islander)	62	Female	2010	Cecum	Moderately differentiated; Grade II	Positive histology	8140/3: Adenocarcinoma, NOS	Regional	T4	N1	M0	10	0	999	24	1	One primary only	41	No radiation and/or cancer-directed surgery	None/Unknown	Yes	Systemic therapy after surgery	Dead (attributable to this cancer dx)	Alive or dead due to cancer	49	Dead
1179012	Single (never married)	White	65	Male	2010	Rectosigmoid Junction	Moderately differentiated; Grade II	Positive histology	8140/3: Adenocarcinoma, NOS	Regional	T3	N1	M0	10	0	999	8	2	One primary only	30	Radiation prior to surgery	Beam radiation	Yes	Systemic therapy before surgery	Alive or dead of other cause	Dead (attributable to causes other than this cancer dx)	7	Dead
1179137	Married (including common law)	White	72	Female	2010	Cecum	Moderately differentiated; Grade II	Positive histology	8481/3: Mucin-producing adenocarcinoma	Distant	T4	N2	M1	10	990	35	7	6	One primary only	30	No radiation and/or cancer-directed surgery	None/Unknown	Yes	Systemic therapy after surgery	Dead (attributable to this cancer dx)	Alive or dead due to cancer	17	Dead
1179148	Single (never married)	White	60	Male	2010	Cecum	Poorly differentiated; Grade III	Positive histology	8140/3: Adenocarcinoma, NOS	Distant	T4	N2	M1	10	990	70	23	12	One primary only	30	No radiation and/or cancer-directed surgery	None/Unknown	Yes	Systemic therapy after surgery	Dead (attributable to this cancer dx)	Alive or dead due to cancer	12	Dead
1179153	Married (including common law)	Black	78	Male	2010	Cecum	Moderately differentiated; Grade II	Positive histology	8480/3: Mucinous adenocarcinoma	Regional	T3	N1	M0	999	0	65	26	2	One primary only	40	No radiation and/or cancer-directed surgery	None/Unknown	No/Unknown	No systemic therapy and/or surgical procedures	Alive or dead of other cause	Alive or dead due to cancer	98	Alive
1179177	Single (never married)	White	65	Male	2010	Rectosigmoid Junction	Poorly differentiated; Grade III	Positive histology	8140/3: Adenocarcinoma, NOS	Regional	T4	N2	M0	10	0	55	14	9	One primary only	30	No radiation and/or cancer-directed surgery	None/Unknown	Yes	Systemic therapy after surgery	Alive or dead of other cause	Alive or dead due to cancer	88	Alive
1179195	Married (including common law)	Other (American Indian/AK Native, Asian/Pacific Islander)	76	Male	2010	Rectum	Moderately differentiated; Grade II	Positive histology	8140/3: Adenocarcinoma, NOS	Localized	T1	N0	M0	20	998	999	0	98	One primary only	0	No radiation and/or cancer-directed surgery	Beam radiation	Yes	No systemic therapy and/or surgical procedures	Alive or dead of other cause	Alive or dead due to cancer	98	Alive
1179199	Single (never married)	White	54	Male	2010	Sigmoid Colon	Moderately differentiated; Grade II	Positive histology	8140/3: Adenocarcinoma, NOS	Distant	T1	N0	M1	10	998	50	0	98	One primary only	0	No radiation and/or cancer-directed surgery	None/Unknown	No/Unknown	No systemic therapy and/or surgical procedures	Dead (attributable to this cancer dx)	Alive or dead due to cancer	3	Dead
1179319	Unknown	Black	58	Female	2010	Sigmoid Colon	Moderately differentiated; Grade II	Positive histology	8210/3: Adenocarcinoma in adenomatous polyp	Localized	T1	N0	M0	20	0	999	8	0	One primary only	30	No radiation and/or cancer-directed surgery	None/Unknown	No/Unknown	No systemic therapy and/or surgical procedures	Alive or dead of other cause	Alive or dead due to cancer	96	Alive
1179338	Unknown	White	73	Female	2010	Rectum	Moderately differentiated; Grade II	Positive histology	8140/3: Adenocarcinoma, NOS	Distant	T4	N1	M1	20	999	50	0	98	One primary only	0	No radiation and/or cancer-directed surgery	Beam radiation	Yes	No systemic therapy and/or surgical procedures	Dead (attributable to this cancer dx)	Alive or dead due to cancer	8	Dead
1179363	Married (including common law)	White	67	Female	2010	Sigmoid Colon	Moderately differentiated; Grade II	Positive histology	8263/3: Adenocarcinoma in tubulovillous adenoma	Regional	T3	N0	M0	998	0	35	18	0	One primary only	40	No radiation and/or cancer-directed surgery	None/Unknown	No/Unknown	No systemic therapy and/or surgical procedures	Alive or dead of other cause	Alive or dead due to cancer	98	Alive
1179411	Married (including common law)	White	60	Female	2010	Sigmoid Colon	Moderately differentiated; Grade II	Positive histology	8140/3: Adenocarcinoma, NOS	Localized	T2	N0	M0	20	0	23	20	0	One primary only	30	No radiation and/or cancer-directed surgery	None/Unknown	No/Unknown	No systemic therapy and/or surgical procedures	Alive or dead of other cause	Alive or dead due to cancer	96	Alive
1179431	Single (never married)	White	68	Male	2010	Descending Colon	Moderately differentiated; Grade II	Positive histology	8480/3: Mucinous adenocarcinoma	Localized	T3	N0	M0	20	0	80	32	0	One primary only	40	No radiation and/or cancer-directed surgery	None/Unknown	No/Unknown	No systemic therapy and/or surgical procedures	Alive or dead of other cause	Dead (attributable to causes other than this cancer dx)	73	Dead
1179555	Single (never married)	White	85	Male	2010	Ascending Colon	Well differentiated; Grade I	Positive histology	8140/3: Adenocarcinoma, NOS	Distant	T4	N2	M1	10	990	30	23	13	One primary only	50	No radiation and/or cancer-directed surgery	None/Unknown	No/Unknown	No systemic therapy and/or surgical procedures	Dead (attributable to this cancer dx)	Alive or dead due to cancer	15	Dead
1179563	Divorced	White	34	Male	2010	Transverse Colon	Well differentiated; Grade I	Positive histology	8140/3: Adenocarcinoma, NOS	Localized	T3	N0	M0	10	0	42	19	0	One primary only	30	No radiation and/or cancer-directed surgery	None/Unknown	No/Unknown	No systemic therapy and/or surgical procedures	Dead (attributable to this cancer dx)	Alive or dead due to cancer	0	Dead
1179745	Married (including common law)	White	61	Male	2010	Sigmoid Colon	Moderately differentiated; Grade II	Positive histology	8140/3: Adenocarcinoma, NOS	Regional	T3	N2	M0	20	2	12	11	4	One primary only	30	No radiation and/or cancer-directed surgery	None/Unknown	Yes	Systemic therapy after surgery	Dead (attributable to this cancer dx)	Alive or dead due to cancer	20	Dead
1179832	Unknown	Black	52	Female	2010	Sigmoid Colon	Poorly differentiated; Grade III	Positive histology	8263/3: Adenocarcinoma in tubulovillous adenoma	Regional	T4	N2	M0	10	990	31	18	7	One primary only	30	No radiation and/or cancer-directed surgery	None/Unknown	Yes	Systemic therapy after surgery	Alive or dead of other cause	Alive or dead due to cancer	97	Alive
1179892	Single (never married)	White	71	Male	2010	Sigmoid Colon	Moderately differentiated; Grade II	Positive histology	8140/3: Adenocarcinoma, NOS	Regional	T3	N1	M0	20	0	25	8	1	One primary only	30	No radiation and/or cancer-directed surgery	None/Unknown	No/Unknown	No systemic therapy and/or surgical procedures	Alive or dead of other cause	Dead (attributable to causes other than this cancer dx)	70	Dead
1179936	Single (never married)	White	72	Female	2010	Cecum	Moderately differentiated; Grade II	Positive histology	8480/3: Mucinous adenocarcinoma	Distant	T3	N2	M1	10	999	65	13	11	One primary only	40	No radiation and/or cancer-directed surgery	None/Unknown	No/Unknown	No systemic therapy and/or surgical procedures	Dead (attributable to this cancer dx)	Alive or dead due to cancer	3	Dead
1179974	Married (including common law)	White	54	Female	2010	Sigmoid Colon	Moderately differentiated; Grade II	Positive histology	8140/3: Adenocarcinoma, NOS	Regional	T3	N1	M0	999	0	55	21	2	One primary only	30	No radiation and/or cancer-directed surgery	None/Unknown	Yes	Systemic therapy after surgery	Alive or dead of other cause	Alive or dead due to cancer	98	Alive
1180012	Married (including common law)	White	70	Male	2010	Rectosigmoid Junction	Moderately differentiated; Grade II	Positive histology	8140/3: Adenocarcinoma, NOS	Regional	T3	N2	M0	20	0	78	24	5	One primary only	30	No radiation and/or cancer-directed surgery	None/Unknown	Yes	Systemic therapy after surgery	Alive or dead of other cause	Alive or dead due to cancer	96	Alive
1180039	Married (including common law)	White	61	Female	2010	Ascending Colon	Moderately differentiated; Grade II	Positive histology	8263/3: Adenocarcinoma in tubulovillous adenoma	Distant	T3	N2	M1	998	2	45	12	4	One primary only	40	No radiation and/or cancer-directed surgery	None/Unknown	No/Unknown	No systemic therapy and/or surgical procedures	Dead (attributable to this cancer dx)	Alive or dead due to cancer	27	Dead
1180057	Married (including common law)	Other (American Indian/AK Native, Asian/Pacific Islander)	44	Female	2010	Rectosigmoid Junction	Moderately differentiated; Grade II	Positive histology	8140/3: Adenocarcinoma, NOS	Localized	T1	N0	M0	998	0	19	19	0	One primary only	30	No radiation and/or cancer-directed surgery	None/Unknown	No/Unknown	No systemic therapy and/or surgical procedures	Alive or dead of other cause	Alive or dead due to cancer	93	Alive
1180087	Married (including common law)	White	76	Male	2010	Sigmoid Colon	Moderately differentiated; Grade II	Positive histology	8140/3: Adenocarcinoma, NOS	Regional	T3	N2	M0	999	0	26	22	6	One primary only	30	No radiation and/or cancer-directed surgery	None/Unknown	Yes	Systemic therapy after surgery	Alive or dead of other cause	Alive or dead due to cancer	98	Alive
1180182	Widowed	White	85	Female	2010	Rectum	Undifferentiated; anaplastic; Grade IV	Positive histology	8140/3: Adenocarcinoma, NOS	Regional	T3	N1	M0	10	0	70	0	98	One primary only	70	Radiation prior to surgery	Beam radiation	Yes	Systemic therapy before surgery	Alive or dead of other cause	Alive or dead due to cancer	100	Alive
1180185	Married (including common law)	White	85	Male	2010	Sigmoid Colon	Moderately differentiated; Grade II	Positive histology	8480/3: Mucinous adenocarcinoma	Distant	T4	N2	M1	10	0	100	15	11	One primary only	30	No radiation and/or cancer-directed surgery	None/Unknown	Yes	Systemic therapy after surgery	Dead (attributable to this cancer dx)	Alive or dead due to cancer	10	Dead
1180192	Married (including common law)	White	75	Female	2010	Ascending Colon	Moderately differentiated; Grade II	Positive histology	8480/3: Mucinous adenocarcinoma	Regional	T4	N1	M0	10	0	75	39	3	One primary only	40	No radiation and/or cancer-directed surgery	None/Unknown	Yes	Systemic therapy after surgery	Dead (attributable to this cancer dx)	Alive or dead due to cancer	35	Dead
1180194	Single (never married)	White	50	Female	2010	Cecum	Moderately differentiated; Grade II	Positive histology	8140/3: Adenocarcinoma, NOS	Localized	T2	N0	M0	20	0	50	32	0	One primary only	40	No radiation and/or cancer-directed surgery	None/Unknown	No/Unknown	No systemic therapy and/or surgical procedures	Alive or dead of other cause	Alive or dead due to cancer	89	Alive
1180200	Divorced	Black	45	Male	2010	Sigmoid Colon	Moderately differentiated; Grade II	Positive histology	8140/3: Adenocarcinoma, NOS	Regional	T3	N2	M0	20	0	35	12	7	One primary only	40	No radiation and/or cancer-directed surgery	None/Unknown	Yes	Systemic therapy after surgery	Alive or dead of other cause	Alive or dead due to cancer	107	Alive
1180205	Married (including common law)	White	46	Male	2010	Cecum	Moderately differentiated; Grade II	Positive histology	8263/3: Adenocarcinoma in tubulovillous adenoma	Localized	T1	N0	M0	998	0	10	24	0	One primary only	40	No radiation and/or cancer-directed surgery	None/Unknown	No/Unknown	No systemic therapy and/or surgical procedures	Alive or dead of other cause	Alive or dead due to cancer	99	Alive
1180211	Widowed	Black	75	Female	2010	Descending Colon	Moderately differentiated; Grade II	Positive histology	8261/3: Adenocarcinoma in villous adenoma	Regional	T3	N2	M0	20	2	28	12	4	One primary only	40	No radiation and/or cancer-directed surgery	None/Unknown	No/Unknown	No systemic therapy and/or surgical procedures	Dead (attributable to this cancer dx)	Alive or dead due to cancer	55	Dead
1180222	Widowed	Other (American Indian/AK Native, Asian/Pacific Islander)	85	Female	2010	Rectum	Moderately differentiated; Grade II	Positive histology	8140/3: Adenocarcinoma, NOS	Regional	T3	N0	M0	10	0	43	8	0	One primary only	50	No radiation and/or cancer-directed surgery	None/Unknown	No/Unknown	No systemic therapy and/or surgical procedures	Alive or dead of other cause	Dead (attributable to causes other than this cancer dx)	24	Dead
1180233	Married (including common law)	Other (American Indian/AK Native, Asian/Pacific Islander)	51	Female	2010	Sigmoid Colon	Moderately differentiated; Grade II	Positive histology	8140/3: Adenocarcinoma, NOS	Localized	T1	N0	M0	20	0	22	25	0	One primary only	30	No radiation and/or cancer-directed surgery	None/Unknown	No/Unknown	No systemic therapy and/or surgical procedures	Alive or dead of other cause	Alive or dead due to cancer	100	Alive
1180240	Unknown	Other (American Indian/AK Native, Asian/Pacific Islander)	73	Female	2010	Rectosigmoid Junction	Moderately differentiated; Grade II	Positive histology	8210/3: Adenocarcinoma in adenomatous polyp	Localized	T1	N0	M0	998	999	10	0	98	One primary only	26	No radiation and/or cancer-directed surgery	None/Unknown	No/Unknown	No systemic therapy and/or surgical procedures	Alive or dead of other cause	Alive or dead due to cancer	98	Alive
1180241	Single (never married)	White	78	Male	2010	Hepatic Flexure	Poorly differentiated; Grade III	Positive histology	8140/3: Adenocarcinoma, NOS	Distant	T1	N1	M1	10	0	70	0	98	One primary only	0	No radiation and/or cancer-directed surgery	None/Unknown	No/Unknown	No systemic therapy and/or surgical procedures	Dead (attributable to this cancer dx)	Alive or dead due to cancer	1	Dead
1180324	Married (including common law)	Other (American Indian/AK Native, Asian/Pacific Islander)	71	Male	2010	Sigmoid Colon	Moderately differentiated; Grade II	Positive histology	8140/3: Adenocarcinoma, NOS	Regional	T4	N2	M0	20	0	62	16	13	One primary only	40	No radiation and/or cancer-directed surgery	None/Unknown	Yes	Systemic therapy after surgery	Alive or dead of other cause	Alive or dead due to cancer	93	Alive
1180325	Married (including common law)	White	42	Male	2010	Rectum	Moderately differentiated; Grade II	Positive histology	8140/3: Adenocarcinoma, NOS	Localized	T3	N0	M0	999	0	35	12	0	One primary only	50	Radiation prior to surgery	Beam radiation	Yes	Systemic therapy after surgery	Alive or dead of other cause	Alive or dead due to cancer	104	Alive
1180381	Married (including common law)	White	81	Male	2010	Hepatic Flexure	Moderately differentiated; Grade II	Positive histology	8210/3: Adenocarcinoma in adenomatous polyp	Localized	T1	N0	M0	20	0	999	14	0	One primary only	40	No radiation and/or cancer-directed surgery	None/Unknown	No/Unknown	No systemic therapy and/or surgical procedures	Alive or dead of other cause	Alive or dead due to cancer	99	Alive
1180385	Single (never married)	Other (American Indian/AK Native, Asian/Pacific Islander)	59	Male	2010	Splenic Flexure	Moderately differentiated; Grade II	Positive histology	8140/3: Adenocarcinoma, NOS	Distant	T1	N0	M1	998	999	999	0	98	One primary only	27	No radiation and/or cancer-directed surgery	None/Unknown	Yes	Systemic therapy after surgery	Dead (attributable to this cancer dx)	Alive or dead due to cancer	17	Dead
1180388	Married (including common law)	White	70	Male	2010	Descending Colon	Moderately differentiated; Grade II	Positive histology	8140/3: Adenocarcinoma, NOS	Regional	T3	N1	M0	10	0	33	17	1	One primary only	30	No radiation and/or cancer-directed surgery	None/Unknown	Yes	Systemic therapy after surgery	Dead (attributable to this cancer dx)	Alive or dead due to cancer	52	Dead
1180391	Widowed	Other (American Indian/AK Native, Asian/Pacific Islander)	83	Female	2010	Sigmoid Colon	Moderately differentiated; Grade II	Positive histology	8210/3: Adenocarcinoma in adenomatous polyp	Localized	T1	N0	M0	999	0	18	21	0	One primary only	30	No radiation and/or cancer-directed surgery	None/Unknown	No/Unknown	No systemic therapy and/or surgical procedures	Alive or dead of other cause	Alive or dead due to cancer	99	Alive
1180396	Single (never married)	White	62	Female	2010	Sigmoid Colon	Moderately differentiated; Grade II	Positive histology	8140/3: Adenocarcinoma, NOS	Localized	T3	N0	M0	10	0	40	20	0	One primary only	30	No radiation and/or cancer-directed surgery	None/Unknown	Yes	Systemic therapy after surgery	Alive or dead of other cause	Alive or dead due to cancer	100	Alive
1180401	Single (never married)	White	46	Female	2010	Sigmoid Colon	Moderately differentiated; Grade II	Positive histology	8140/3: Adenocarcinoma, NOS	Localized	T1	N0	M0	999	0	38	8	0	One primary only	30	No radiation and/or cancer-directed surgery	None/Unknown	No/Unknown	No systemic therapy and/or surgical procedures	Alive or dead of other cause	Alive or dead due to cancer	103	Alive
1180407	Single (never married)	White	65	Male	2010	Sigmoid Colon	Moderately differentiated; Grade II	Positive histology	8263/3: Adenocarcinoma in tubulovillous adenoma	Localized	T2	N0	M0	999	0	35	5	0	One primary only	30	No radiation and/or cancer-directed surgery	None/Unknown	No/Unknown	No systemic therapy and/or surgical procedures	Alive or dead of other cause	Alive or dead due to cancer	97	Alive
1180413	Married (including common law)	White	68	Female	2010	Sigmoid Colon	Moderately differentiated; Grade II	Positive histology	8210/3: Adenocarcinoma in adenomatous polyp	Localized	T1	N0	M0	999	999	999	7	0	One primary only	30	No radiation and/or cancer-directed surgery	None/Unknown	No/Unknown	No systemic therapy and/or surgical procedures	Alive or dead of other cause	Alive or dead due to cancer	99	Alive
1180416	Married (including common law)	Other (American Indian/AK Native, Asian/Pacific Islander)	69	Male	2010	Sigmoid Colon	Moderately differentiated; Grade II	Positive histology	8263/3: Adenocarcinoma in tubulovillous adenoma	Localized	T1	N0	M0	999	0	20	10	0	One primary only	30	No radiation and/or cancer-directed surgery	None/Unknown	No/Unknown	No systemic therapy and/or surgical procedures	Alive or dead of other cause	Dead (attributable to causes other than this cancer dx)	96	Dead
1180439	Widowed	White	85	Female	2010	Rectosigmoid Junction	Moderately differentiated; Grade II	Positive histology	8140/3: Adenocarcinoma, NOS	Localized	T1	N0	M0	998	999	10	0	98	One primary only	0	No radiation and/or cancer-directed surgery	Beam radiation	No/Unknown	No systemic therapy and/or surgical procedures	Dead (attributable to this cancer dx)	Alive or dead due to cancer	27	Dead
1180442	Married (including common law)	Other (American Indian/AK Native, Asian/Pacific Islander)	82	Female	2010	Rectosigmoid Junction	Moderately differentiated; Grade II	Positive histology	8140/3: Adenocarcinoma, NOS	Localized	T1	N0	M0	20	0	30	1	0	One primary only	40	No radiation and/or cancer-directed surgery	None/Unknown	No/Unknown	No systemic therapy and/or surgical procedures	Alive or dead of other cause	Alive or dead due to cancer	97	Alive
1180446	Single (never married)	White	50	Female	2010	Rectosigmoid Junction	Moderately differentiated; Grade II	Positive histology	8140/3: Adenocarcinoma, NOS	Regional	T3	N0	M0	20	0	45	25	0	One primary only	30	No radiation and/or cancer-directed surgery	None/Unknown	No/Unknown	No systemic therapy and/or surgical procedures	Alive or dead of other cause	Alive or dead due to cancer	103	Alive
1180449	Widowed	White	85	Female	2010	Rectosigmoid Junction	Moderately differentiated; Grade II	Positive histology	8140/3: Adenocarcinoma, NOS	Localized	T3	N0	M0	999	999	60	8	0	One primary only	30	No radiation and/or cancer-directed surgery	None/Unknown	No/Unknown	No systemic therapy and/or surgical procedures	Dead (attributable to this cancer dx)	Alive or dead due to cancer	40	Dead
1180450	Divorced	White	68	Male	2010	Rectum	Moderately differentiated; Grade II	Positive histology	8140/3: Adenocarcinoma, NOS	Regional	T4	N1	M0	10	0	70	11	1	One primary only	30	Radiation prior to surgery	Beam radiation	Yes	Systemic therapy both before and after surgery	Dead (attributable to this cancer dx)	Alive or dead due to cancer	33	Dead
1180451	Married (including common law)	White	75	Female	2010	Rectum	Moderately differentiated; Grade II	Positive histology	8480/3: Mucinous adenocarcinoma	Regional	T3	N0	M0	10	0	999	5	0	One primary only	30	Intraoperative rad with other rad before/after surgery	Beam radiation	Yes	Intraop systemic rx & oth systemic rx before/after surg	Dead (attributable to this cancer dx)	Alive or dead due to cancer	32	Dead
1180535	Widowed	White	85	Female	2010	Ascending Colon	Moderately differentiated; Grade II	Positive histology	8481/3: Mucin-producing adenocarcinoma	Localized	T2	N0	M0	10	0	20	16	0	One primary only	30	No radiation and/or cancer-directed surgery	None/Unknown	No/Unknown	No systemic therapy and/or surgical procedures	Alive or dead of other cause	Dead (attributable to causes other than this cancer dx)	75	Dead
1180624	Married (including common law)	White	36	Male	2010	Splenic Flexure	Poorly differentiated; Grade III	Positive histology	8140/3: Adenocarcinoma, NOS	Regional	T4	N1	M0	10	0	35	13	1	One primary only	30	No radiation and/or cancer-directed surgery	None/Unknown	Yes	Systemic therapy after surgery	Dead (attributable to this cancer dx)	Alive or dead due to cancer	28	Dead
1180833	Divorced	White	82	Female	2010	Ascending Colon	Moderately differentiated; Grade II	Positive histology	8480/3: Mucinous adenocarcinoma	Regional	T3	N0	M0	20	0	27	22	0	One primary only	40	No radiation and/or cancer-directed surgery	None/Unknown	No/Unknown	No systemic therapy and/or surgical procedures	Alive or dead of other cause	Dead (attributable to causes other than this cancer dx)	64	Dead
1180866	Married (including common law)	White	35	Male	2010	Cecum	Moderately differentiated; Grade II	Positive histology	8263/3: Adenocarcinoma in tubulovillous adenoma	Localized	T3	N0	M0	20	0	965	23	99	One primary only	40	No radiation and/or cancer-directed surgery	None/Unknown	Yes	Systemic therapy after surgery	Alive or dead of other cause	Alive or dead due to cancer	96	Alive
1181082	Married (including common law)	Black	55	Female	2010	Sigmoid Colon	Moderately differentiated; Grade II	Positive histology	8140/3: Adenocarcinoma, NOS	Distant	T3	N0	M1	10	0	50	9	0	One primary only	30	No radiation and/or cancer-directed surgery	None/Unknown	No/Unknown	No systemic therapy and/or surgical procedures	Dead (attributable to this cancer dx)	Alive or dead due to cancer	19	Dead
1181106	Married (including common law)	Black	82	Female	2010	Ascending Colon	Poorly differentiated; Grade III	Positive histology	8140/3: Adenocarcinoma, NOS	Distant	T3	N2	M1	998	0	90	15	10	One primary only	30	No radiation and/or cancer-directed surgery	None/Unknown	Yes	Systemic therapy after surgery	Dead (attributable to this cancer dx)	Alive or dead due to cancer	10	Dead
1181433	Married (including common law)	White	57	Female	2010	Ascending Colon	Moderately differentiated; Grade II	Positive histology	8140/3: Adenocarcinoma, NOS	Regional	T4	N2	M0	20	990	35	26	9	One primary only	30	No radiation and/or cancer-directed surgery	None/Unknown	Yes	Systemic therapy after surgery	Dead (attributable to this cancer dx)	Alive or dead due to cancer	61	Dead
1181507	Unknown	White	62	Female	2010	Rectum	Moderately differentiated; Grade II	Positive histology	8140/3: Adenocarcinoma, NOS	Regional	T4	N2	M0	998	990	41	24	22	One primary only	30	Radiation after surgery	Beam radiation	Yes	Systemic therapy after surgery	Dead (attributable to this cancer dx)	Alive or dead due to cancer	25	Dead
1181627	Single (never married)	White	49	Male	2010	Sigmoid Colon	Moderately differentiated; Grade II	Positive histology	8140/3: Adenocarcinoma, NOS	Distant	T3	N0	M1	10	1	11	17	0	One primary only	30	No radiation and/or cancer-directed surgery	None/Unknown	Yes	Systemic therapy both before and after surgery	Dead (attributable to this cancer dx)	Alive or dead due to cancer	74	Dead
1181880	Married (including common law)	White	83	Male	2010	Descending Colon	Moderately differentiated; Grade II	Positive histology	8140/3: Adenocarcinoma, NOS	Regional	T3	N1	M0	998	999	35	19	2	One primary only	30	No radiation and/or cancer-directed surgery	None/Unknown	Yes	Systemic therapy after surgery	Dead (attributable to this cancer dx)	Alive or dead due to cancer	42	Dead
1181943	Married (including common law)	White	31	Female	2010	Sigmoid Colon	Moderately differentiated; Grade II	Positive histology	8140/3: Adenocarcinoma, NOS	Localized	T2	N0	M0	998	0	31	34	0	One primary only	30	No radiation and/or cancer-directed surgery	None/Unknown	No/Unknown	No systemic therapy and/or surgical procedures	Alive or dead of other cause	Alive or dead due to cancer	101	Alive
1181957	Divorced	White	41	Female	2010	Rectosigmoid Junction	Moderately differentiated; Grade II	Positive histology	8140/3: Adenocarcinoma, NOS	Regional	T3	N2	M0	10	1	32	16	10	One primary only	30	Radiation prior to surgery	Beam radiation	Yes	Systemic therapy before surgery	Dead (attributable to this cancer dx)	Alive or dead due to cancer	41	Dead
1182262	Single (never married)	White	67	Male	2010	Cecum	Moderately differentiated; Grade II	Positive histology	8140/3: Adenocarcinoma, NOS	Distant	T4	N1	M1	997	0	55	18	3	One primary only	40	No radiation and/or cancer-directed surgery	None/Unknown	Yes	Systemic therapy after surgery	Dead (attributable to this cancer dx)	Alive or dead due to cancer	20	Dead
1182265	Married (including common law)	Black	73	Male	2010	Cecum	Moderately differentiated; Grade II	Positive histology	8140/3: Adenocarcinoma, NOS	Regional	T3	N1	M0	20	0	39	27	2	One primary only	40	No radiation and/or cancer-directed surgery	None/Unknown	No/Unknown	No systemic therapy and/or surgical procedures	Dead (attributable to this cancer dx)	Alive or dead due to cancer	48	Dead
1182304	Married (including common law)	White	85	Male	2010	Hepatic Flexure	Moderately differentiated; Grade II	Positive histology	8261/3: Adenocarcinoma in villous adenoma	Regional	T3	N1	M0	999	999	70	12	1	One primary only	40	No radiation and/or cancer-directed surgery	None/Unknown	No/Unknown	No systemic therapy and/or surgical procedures	Alive or dead of other cause	Dead (attributable to causes other than this cancer dx)	1	Dead
1182347	Single (never married)	White	54	Male	2010	Rectum	Moderately differentiated; Grade II	Positive histology	8140/3: Adenocarcinoma, NOS	Regional	T3	N1	M0	20	0	999	6	0	One primary only	50	Radiation prior to surgery	Beam radiation	Yes	Systemic therapy both before and after surgery	Alive or dead of other cause	Alive or dead due to cancer	97	Alive
1182357	Single (never married)	Black	64	Female	2010	Cecum	Moderately differentiated; Grade II	Positive histology	8140/3: Adenocarcinoma, NOS	Regional	T2	N1	M0	20	0	50	19	1	One primary only	40	No radiation and/or cancer-directed surgery	None/Unknown	Yes	Systemic therapy after surgery	Alive or dead of other cause	Alive or dead due to cancer	100	Alive
1182366	Widowed	White	81	Male	2010	Ascending Colon	Poorly differentiated; Grade III	Positive histology	8140/3: Adenocarcinoma, NOS	Regional	T3	N1	M0	10	10	80	21	1	One primary only	40	No radiation and/or cancer-directed surgery	None/Unknown	Yes	Systemic therapy after surgery	Alive or dead of other cause	Alive or dead due to cancer	78	Alive
1182401	Divorced	White	79	Female	2010	Splenic Flexure	Poorly differentiated; Grade III	Positive histology	8140/3: Adenocarcinoma, NOS	Regional	T4	N1	M0	10	0	60	7	1	One primary only	40	No radiation and/or cancer-directed surgery	None/Unknown	Yes	Systemic therapy after surgery	Alive or dead of other cause	Dead (attributable to causes other than this cancer dx)	18	Dead
1182451	Married (including common law)	Other (American Indian/AK Native, Asian/Pacific Islander)	70	Male	2012	Rectum	Moderately differentiated; Grade II	Positive histology	8140/3: Adenocarcinoma, NOS	Regional	T2	N1	M0	999	0	80	9	2	One primary only	30	No radiation and/or cancer-directed surgery	None/Unknown	Yes	Systemic therapy after surgery	Alive or dead of other cause	Alive or dead due to cancer	74	Alive
1182552	Single (never married)	White	72	Male	2010	Ascending Colon	Poorly differentiated; Grade III	Positive histology	8140/3: Adenocarcinoma, NOS	Regional	T3	N1	M0	20	0	20	32	3	One primary only	40	No radiation and/or cancer-directed surgery	None/Unknown	Yes	Systemic therapy after surgery	Dead (attributable to this cancer dx)	Alive or dead due to cancer	46	Dead
1182560	Married (including common law)	White	85	Male	2010	Cecum	Undifferentiated; anaplastic; Grade IV	Positive histology	8140/3: Adenocarcinoma, NOS	Regional	T4	N2	M0	998	0	70	29	26	One primary only	40	No radiation and/or cancer-directed surgery	None/Unknown	Yes	Systemic therapy after surgery	Dead (attributable to this cancer dx)	Alive or dead due to cancer	12	Dead
1182624	Married (including common law)	Other (American Indian/AK Native, Asian/Pacific Islander)	71	Female	2010	Hepatic Flexure	Moderately differentiated; Grade II	Positive histology	8140/3: Adenocarcinoma, NOS	Regional	T3	N0	M0	20	0	22	19	0	One primary only	40	No radiation and/or cancer-directed surgery	None/Unknown	No/Unknown	No systemic therapy and/or surgical procedures	Alive or dead of other cause	Alive or dead due to cancer	98	Alive
1182716	Unknown	White	67	Female	2010	Hepatic Flexure	Moderately differentiated; Grade II	Positive histology	8210/3: Adenocarcinoma in adenomatous polyp	Localized	T1	N0	M0	998	0	999	0	98	One primary only	28	No radiation and/or cancer-directed surgery	None/Unknown	No/Unknown	No systemic therapy and/or surgical procedures	Alive or dead of other cause	Dead (attributable to causes other than this cancer dx)	92	Dead
1182736	Married (including common law)	White	81	Male	2010	Cecum	Moderately differentiated; Grade II	Positive histology	8140/3: Adenocarcinoma, NOS	Distant	T3	N2	M1	10	990	45	18	7	One primary only	40	No radiation and/or cancer-directed surgery	None/Unknown	Yes	Systemic therapy after surgery	Dead (attributable to this cancer dx)	Alive or dead due to cancer	10	Dead
1182738	Married (including common law)	Other (American Indian/AK Native, Asian/Pacific Islander)	53	Female	2010	Rectum	Moderately differentiated; Grade II	Positive histology	8140/3: Adenocarcinoma, NOS	Localized	T1	N0	M0	998	0	6	0	98	One primary only	30	No radiation and/or cancer-directed surgery	None/Unknown	No/Unknown	No systemic therapy and/or surgical procedures	Alive or dead of other cause	Alive or dead due to cancer	97	Alive
1182743	Married (including common law)	White	78	Female	2010	Splenic Flexure	Poorly differentiated; Grade III	Positive histology	8140/3: Adenocarcinoma, NOS	Regional	T3	N2	M0	10	0	80	13	5	One primary only	40	No radiation and/or cancer-directed surgery	None/Unknown	Yes	Systemic therapy after surgery	Alive or dead of other cause	Alive or dead due to cancer	97	Alive
1182864	Married (including common law)	Other (American Indian/AK Native, Asian/Pacific Islander)	64	Female	2010	Transverse Colon	Moderately differentiated; Grade II	Positive histology	8263/3: Adenocarcinoma in tubulovillous adenoma	Distant	T4	N2	M1	998	0	52	11	8	One primary only	30	No radiation and/or cancer-directed surgery	None/Unknown	Yes	Systemic therapy after surgery	Dead (attributable to this cancer dx)	Alive or dead due to cancer	18	Dead
1182867	Married (including common law)	Black	57	Male	2010	Sigmoid Colon	Moderately differentiated; Grade II	Positive histology	8140/3: Adenocarcinoma, NOS	Localized	T2	N0	M0	20	0	40	41	0	One primary only	30	No radiation and/or cancer-directed surgery	None/Unknown	No/Unknown	No systemic therapy and/or surgical procedures	Alive or dead of other cause	Alive or dead due to cancer	106	Alive
1182887	Married (including common law)	Other (American Indian/AK Native, Asian/Pacific Islander)	56	Female	2010	Ascending Colon	Moderately differentiated; Grade II	Positive histology	8140/3: Adenocarcinoma, NOS	Localized	T1	N0	M0	998	0	22	15	0	One primary only	30	No radiation and/or cancer-directed surgery	None/Unknown	No/Unknown	No systemic therapy and/or surgical procedures	Alive or dead of other cause	Alive or dead due to cancer	90	Alive
1182905	Married (including common law)	Other (American Indian/AK Native, Asian/Pacific Islander)	85	Male	2010	Descending Colon	Moderately differentiated; Grade II	Positive histology	8140/3: Adenocarcinoma, NOS	Regional	T3	N2	M0	998	0	30	17	11	One primary only	30	No radiation and/or cancer-directed surgery	None/Unknown	No/Unknown	No systemic therapy and/or surgical procedures	Alive or dead of other cause	Dead (attributable to causes other than this cancer dx)	63	Dead
1182948	Widowed	White	82	Male	2010	Rectosigmoid Junction	Moderately differentiated; Grade II	Positive histology	8140/3: Adenocarcinoma, NOS	Regional	T3	N0	M0	20	999	50	8	0	One primary only	30	No radiation and/or cancer-directed surgery	None/Unknown	No/Unknown	No systemic therapy and/or surgical procedures	Alive or dead of other cause	Dead (attributable to causes other than this cancer dx)	11	Dead
1182949	Single (never married)	White	74	Male	2010	Cecum	Moderately differentiated; Grade II	Positive histology	8140/3: Adenocarcinoma, NOS	Regional	T4	N0	M0	999	0	70	20	0	One primary only	40	No radiation and/or cancer-directed surgery	None/Unknown	No/Unknown	No systemic therapy and/or surgical procedures	Dead (attributable to this cancer dx)	Alive or dead due to cancer	12	Dead
1182970	Married (including common law)	White	54	Male	2010	Sigmoid Colon	Moderately differentiated; Grade II	Positive histology	8263/3: Adenocarcinoma in tubulovillous adenoma	Regional	T2	N1	M0	20	0	40	15	3	One primary only	40	No radiation and/or cancer-directed surgery	None/Unknown	No/Unknown	No systemic therapy and/or surgical procedures	Alive or dead of other cause	Alive or dead due to cancer	85	Alive
1183093	Married (including common law)	White	67	Female	2010	Transverse Colon	Undifferentiated; anaplastic; Grade IV	Positive histology	8140/3: Adenocarcinoma, NOS	Regional	T3	N1	M0	20	0	72	19	2	One primary only	30	No radiation and/or cancer-directed surgery	None/Unknown	Yes	Systemic therapy after surgery	Alive or dead of other cause	Alive or dead due to cancer	99	Alive
1183110	Widowed	Other (American Indian/AK Native, Asian/Pacific Islander)	67	Female	2010	Sigmoid Colon	Moderately differentiated; Grade II	Positive histology	8140/3: Adenocarcinoma, NOS	Regional	T3	N1	M0	999	0	65	21	3	One primary only	30	No radiation and/or cancer-directed surgery	None/Unknown	Yes	Systemic therapy after surgery	Alive or dead of other cause	Alive or dead due to cancer	59	Alive
1183146	Married (including common law)	White	55	Male	2010	Descending Colon	Moderately differentiated; Grade II	Positive histology	8140/3: Adenocarcinoma, NOS	Regional	T3	N1	M0	20	0	30	14	2	One primary only	30	No radiation and/or cancer-directed surgery	None/Unknown	Yes	Systemic therapy after surgery	Dead (attributable to this cancer dx)	Alive or dead due to cancer	63	Dead
1183256	Married (including common law)	White	50	Male	2010	Hepatic Flexure	Moderately differentiated; Grade II	Positive histology	8140/3: Adenocarcinoma, NOS	Localized	T3	N0	M0	20	0	60	62	0	One primary only	30	No radiation and/or cancer-directed surgery	None/Unknown	No/Unknown	No systemic therapy and/or surgical procedures	Alive or dead of other cause	Alive or dead due to cancer	98	Alive
1183257	Married (including common law)	White	55	Female	2010	Rectosigmoid Junction	Moderately differentiated; Grade II	Positive histology	8140/3: Adenocarcinoma, NOS	Localized	T3	N0	M0	20	0	50	4	0	One primary only	30	Radiation prior to surgery	Beam radiation	Yes	Systemic therapy both before and after surgery	Alive or dead of other cause	Alive or dead due to cancer	98	Alive
1183260	Unknown	White	63	Male	2010	Rectum	Moderately differentiated; Grade II	Positive histology	8210/3: Adenocarcinoma in adenomatous polyp	Localized	T1	N0	M0	998	0	999	0	98	One primary only	26	No radiation and/or cancer-directed surgery	None/Unknown	No/Unknown	No systemic therapy and/or surgical procedures	Alive or dead of other cause	Alive or dead due to cancer	97	Alive
1183473	Married (including common law)	Other (American Indian/AK Native, Asian/Pacific Islander)	58	Female	2010	Rectum	Moderately differentiated; Grade II	Positive histology	8140/3: Adenocarcinoma, NOS	Regional	T3	N1	M0	20	0	65	12	2	One primary only	30	Radiation prior to surgery	Beam radiation	Yes	Systemic therapy both before and after surgery	Alive or dead of other cause	Alive or dead due to cancer	97	Alive
1183502	Married (including common law)	Other (American Indian/AK Native, Asian/Pacific Islander)	39	Female	2010	Sigmoid Colon	Poorly differentiated; Grade III	Positive histology	8480/3: Mucinous adenocarcinoma	Localized	T3	N0	M0	999	0	65	20	0	One primary only	30	No radiation and/or cancer-directed surgery	None/Unknown	Yes	Systemic therapy after surgery	Alive or dead of other cause	Alive or dead due to cancer	96	Alive
1183551	Married (including common law)	Other (American Indian/AK Native, Asian/Pacific Islander)	66	Female	2010	Sigmoid Colon	Moderately differentiated; Grade II	Positive histology	8140/3: Adenocarcinoma, NOS	Localized	T1	N0	M0	20	0	999	19	0	One primary only	30	No radiation and/or cancer-directed surgery	None/Unknown	No/Unknown	No systemic therapy and/or surgical procedures	Alive or dead of other cause	Alive or dead due to cancer	105	Alive
1183624	Married (including common law)	White	50	Male	2010	Rectosigmoid Junction	Moderately differentiated; Grade II	Positive histology	8480/3: Mucinous adenocarcinoma	Distant	T3	N2	M1	20	0	26	14	5	One primary only	30	No radiation and/or cancer-directed surgery	None/Unknown	Yes	Systemic therapy after surgery	Alive or dead of other cause	Alive or dead due to cancer	96	Alive
1183712	Divorced	White	43	Female	2010	Sigmoid Colon	Moderately differentiated; Grade II	Positive histology	8140/3: Adenocarcinoma, NOS	Regional	T3	N1	M0	20	0	28	14	1	One primary only	30	No radiation and/or cancer-directed surgery	None/Unknown	Yes	Systemic therapy after surgery	Alive or dead of other cause	Alive or dead due to cancer	79	Alive
1183980	Married (including common law)	Other (American Indian/AK Native, Asian/Pacific Islander)	53	Male	2010	Appendix	Moderately differentiated; Grade II	Positive histology	8480/3: Mucinous adenocarcinoma	Regional	T4	N0	M0	10	999	999	0	98	One primary only	32	No radiation and/or cancer-directed surgery	None/Unknown	No/Unknown	No systemic therapy and/or surgical procedures	Dead (attributable to this cancer dx)	Alive or dead due to cancer	26	Dead
1184101	Single (never married)	White	56	Female	2010	Sigmoid Colon	Moderately differentiated; Grade II	Positive histology	8140/3: Adenocarcinoma, NOS	Localized	T3	N0	M0	20	0	42	45	0	One primary only	30	No radiation and/or cancer-directed surgery	None/Unknown	No/Unknown	No systemic therapy and/or surgical procedures	Alive or dead of other cause	Dead (attributable to causes other than this cancer dx)	91	Dead
1184106	Single (never married)	Other (American Indian/AK Native, Asian/Pacific Islander)	57	Female	2010	Cecum	Poorly differentiated; Grade III	Positive histology	8140/3: Adenocarcinoma, NOS	Regional	T3	N1	M0	999	0	50	13	3	One primary only	40	No radiation and/or cancer-directed surgery	None/Unknown	Yes	Systemic therapy after surgery	Alive or dead of other cause	Alive or dead due to cancer	101	Alive
1184118	Married (including common law)	Other (American Indian/AK Native, Asian/Pacific Islander)	75	Female	2010	Transverse Colon	Moderately differentiated; Grade II	Positive histology	8263/3: Adenocarcinoma in tubulovillous adenoma	Regional	T3	N2	M0	20	990	48	12	4	One primary only	30	No radiation and/or cancer-directed surgery	None/Unknown	Yes	Systemic therapy after surgery	Alive or dead of other cause	Dead (attributable to causes other than this cancer dx)	54	Dead
1184228	Married (including common law)	White	45	Male	2010	Rectum	Moderately differentiated; Grade II	Positive histology	8140/3: Adenocarcinoma, NOS	Distant	T1	N0	M1	998	0	999	98	0	One primary only	0	No radiation and/or cancer-directed surgery	None/Unknown	No/Unknown	No systemic therapy and/or surgical procedures	Alive or dead of other cause	Alive or dead due to cancer	0	Alive
1184309	Married (including common law)	Other (American Indian/AK Native, Asian/Pacific Islander)	72	Female	2010	Cecum	Moderately differentiated; Grade II	Positive histology	8140/3: Adenocarcinoma, NOS	Distant	T4	N1	M1	10	0	40	18	1	One primary only	40	No radiation and/or cancer-directed surgery	None/Unknown	Yes	Systemic therapy after surgery	Dead (attributable to this cancer dx)	Alive or dead due to cancer	6	Dead
1184313	Married (including common law)	Other (American Indian/AK Native, Asian/Pacific Islander)	67	Male	2010	Cecum	Moderately differentiated; Grade II	Positive histology	8140/3: Adenocarcinoma, NOS	Regional	T4	N1	M0	999	0	50	43	2	One primary only	40	No radiation and/or cancer-directed surgery	None/Unknown	Yes	Systemic therapy after surgery	Alive or dead of other cause	Alive or dead due to cancer	103	Alive
1184314	Widowed	White	85	Female	2010	Cecum	Moderately differentiated; Grade II	Positive histology	8140/3: Adenocarcinoma, NOS	Localized	T1	N0	M0	10	999	20	0	98	One primary only	0	No radiation and/or cancer-directed surgery	None/Unknown	No/Unknown	No systemic therapy and/or surgical procedures	Alive or dead of other cause	Dead (attributable to causes other than this cancer dx)	1	Dead
1184318	Single (never married)	White	54	Female	2010	Splenic Flexure	Moderately differentiated; Grade II	Positive histology	8210/3: Adenocarcinoma in adenomatous polyp	Localized	T1	N0	M0	999	0	3	12	0	One primary only	30	No radiation and/or cancer-directed surgery	None/Unknown	No/Unknown	No systemic therapy and/or surgical procedures	Alive or dead of other cause	Alive or dead due to cancer	96	Alive
1184348	Single (never married)	Black	58	Male	2010	Hepatic Flexure	Moderately differentiated; Grade II	Positive histology	8140/3: Adenocarcinoma, NOS	Localized	T2	N0	M0	998	999	999	98	0	One primary only	40	No radiation and/or cancer-directed surgery	None/Unknown	No/Unknown	No systemic therapy and/or surgical procedures	Alive or dead of other cause	Alive or dead due to cancer	103	Alive
1184354	Widowed	Other (American Indian/AK Native, Asian/Pacific Islander)	56	Female	2010	Rectum	Moderately differentiated; Grade II	Positive histology	8140/3: Adenocarcinoma, NOS	Regional	T3	N1	M0	998	0	999	14	0	One primary only	30	Radiation prior to surgery	Beam radiation	Yes	Systemic therapy both before and after surgery	Alive or dead of other cause	Alive or dead due to cancer	99	Alive
1184355	Widowed	White	85	Female	2010	Sigmoid Colon	Well differentiated; Grade I	Positive histology	8140/3: Adenocarcinoma, NOS	Localized	T3	N0	M0	998	0	30	0	98	One primary only	0	No radiation and/or cancer-directed surgery	None/Unknown	No/Unknown	No systemic therapy and/or surgical procedures	Alive or dead of other cause	Dead (attributable to causes other than this cancer dx)	Unknown	Dead
1184414	Married (including common law)	White	73	Male	2010	Ascending Colon	Poorly differentiated; Grade III	Positive histology	8140/3: Adenocarcinoma, NOS	Localized	T1	N0	M0	20	0	10	13	0	One primary only	40	No radiation and/or cancer-directed surgery	None/Unknown	No/Unknown	No systemic therapy and/or surgical procedures	Alive or dead of other cause	Alive or dead due to cancer	96	Alive
1184571	Married (including common law)	White	74	Female	2010	Rectosigmoid Junction	Moderately differentiated; Grade II	Positive histology	8140/3: Adenocarcinoma, NOS	Regional	T4	N1	M0	10	999	100	9	0	One primary only	30	Radiation prior to surgery	Beam radiation	Yes	Systemic therapy both before and after surgery	Alive or dead of other cause	Alive or dead due to cancer	100	Alive
1184592	Married (including common law)	White	79	Male	2010	Rectum	Moderately differentiated; Grade II	Positive histology	8140/3: Adenocarcinoma, NOS	Distant	T4	N2	M1	999	990	50	15	8	One primary only	30	No radiation and/or cancer-directed surgery	None/Unknown	Yes	Systemic therapy after surgery	Dead (attributable to this cancer dx)	Alive or dead due to cancer	2	Dead
1184629	Married (including common law)	White	56	Male	2010	Splenic Flexure	Well differentiated; Grade I	Positive histology	8480/3: Mucinous adenocarcinoma	Regional	T3	N1	M0	20	0	45	40	1	One primary only	60	No radiation and/or cancer-directed surgery	None/Unknown	Yes	Systemic therapy after surgery	Alive or dead of other cause	Alive or dead due to cancer	98	Alive
1184854	Single (never married)	White	44	Male	2010	Rectum	Moderately differentiated; Grade II	Positive histology	8140/3: Adenocarcinoma, NOS	Localized	T3	N0	M0	998	0	35	9	0	One primary only	30	Radiation after surgery	Beam radiation	Yes	Systemic therapy after surgery	Alive or dead of other cause	Alive or dead due to cancer	97	Alive
1185065	Married (including common law)	White	70	Female	2010	Rectum	Moderately differentiated; Grade II	Positive histology	8140/3: Adenocarcinoma, NOS	Localized	T2	N0	M0	10	990	1	14	0	One primary only	30	Radiation prior to surgery	Beam radiation	Yes	Systemic therapy before surgery	Alive or dead of other cause	Alive or dead due to cancer	99	Alive
1185089	Widowed	Black	68	Female	2010	Ascending Colon	Moderately differentiated; Grade II	Positive histology	8140/3: Adenocarcinoma, NOS	Distant	T1	N1	M1	10	999	999	0	98	One primary only	0	No radiation and/or cancer-directed surgery	None/Unknown	Yes	No systemic therapy and/or surgical procedures	Dead (attributable to this cancer dx)	Alive or dead due to cancer	6	Dead
1185182	Unknown	White	85	Female	2010	Ascending Colon	Poorly differentiated; Grade III	Positive histology	8140/3: Adenocarcinoma, NOS	Regional	T3	N1	M0	998	0	100	12	1	One primary only	40	No radiation and/or cancer-directed surgery	None/Unknown	No/Unknown	No systemic therapy and/or surgical procedures	Dead (attributable to this cancer dx)	Alive or dead due to cancer	10	Dead
1185183	Divorced	White	79	Female	2010	Ascending Colon	Moderately differentiated; Grade II	Positive histology	8210/3: Adenocarcinoma in adenomatous polyp	Localized	T2	N0	M0	20	0	18	16	0	One primary only	40	No radiation and/or cancer-directed surgery	None/Unknown	No/Unknown	No systemic therapy and/or surgical procedures	Alive or dead of other cause	Alive or dead due to cancer	96	Alive
1185186	Married (including common law)	White	52	Female	2010	Ascending Colon	Moderately differentiated; Grade II	Positive histology	8140/3: Adenocarcinoma, NOS	Localized	T3	N0	M0	20	0	65	15	0	One primary only	40	No radiation and/or cancer-directed surgery	None/Unknown	No/Unknown	No systemic therapy and/or surgical procedures	Alive or dead of other cause	Alive or dead due to cancer	96	Alive
1185191	Married (including common law)	White	69	Male	2010	Sigmoid Colon	Moderately differentiated; Grade II	Positive histology	8263/3: Adenocarcinoma in tubulovillous adenoma	Localized	T1	N0	M0	998	0	999	0	98	One primary only	28	No radiation and/or cancer-directed surgery	None/Unknown	No/Unknown	No systemic therapy and/or surgical procedures	Alive or dead of other cause	Alive or dead due to cancer	98	Alive
1185192	Single (never married)	White	54	Female	2010	Rectum	Moderately differentiated; Grade II	Positive histology	8140/3: Adenocarcinoma, NOS	Regional	T2	N1	M0	10	0	46	14	0	One primary only	30	Radiation prior to surgery	Beam radiation	Yes	Systemic therapy both before and after surgery	Alive or dead of other cause	Alive or dead due to cancer	90	Alive
1185237	Married (including common law)	White	55	Male	2010	Descending Colon	Moderately differentiated; Grade II	Positive histology	8140/3: Adenocarcinoma, NOS	Localized	T3	N0	M0	20	0	57	21	0	One primary only	40	No radiation and/or cancer-directed surgery	None/Unknown	No/Unknown	No systemic therapy and/or surgical procedures	Alive or dead of other cause	Alive or dead due to cancer	100	Alive
1185272	Married (including common law)	White	85	Female	2010	Sigmoid Colon	Well differentiated; Grade I	Positive histology	8263/3: Adenocarcinoma in tubulovillous adenoma	Localized	T1	N0	M0	20	0	3	0	98	One primary only	30	No radiation and/or cancer-directed surgery	None/Unknown	No/Unknown	No systemic therapy and/or surgical procedures	Alive or dead of other cause	Alive or dead due to cancer	101	Alive
1185277	Married (including common law)	White	81	Male	2010	Sigmoid Colon	Moderately differentiated; Grade II	Positive histology	8140/3: Adenocarcinoma, NOS	Localized	T2	N0	M0	998	0	35	10	0	One primary only	30	No radiation and/or cancer-directed surgery	None/Unknown	No/Unknown	No systemic therapy and/or surgical procedures	Alive or dead of other cause	Alive or dead due to cancer	100	Alive
1185318	Married (including common law)	Other (American Indian/AK Native, Asian/Pacific Islander)	72	Male	2010	Hepatic Flexure	Moderately differentiated; Grade II	Positive histology	8140/3: Adenocarcinoma, NOS	Distant	T4	N0	M1	10	0	27	28	0	One primary only	40	No radiation and/or cancer-directed surgery	None/Unknown	Yes	Systemic therapy both before and after surgery	Dead (attributable to this cancer dx)	Alive or dead due to cancer	14	Dead
1185354	Married (including common law)	Black	65	Female	2010	Rectum	Well differentiated; Grade I	Positive histology	8263/3: Adenocarcinoma in tubulovillous adenoma	Regional	T3	N1	M0	998	1	75	12	0	One primary only	50	Radiation prior to surgery	Beam radiation	Yes	Systemic therapy before surgery	Alive or dead of other cause	Alive or dead due to cancer	98	Alive
1185441	Single (never married)	Other (American Indian/AK Native, Asian/Pacific Islander)	66	Female	2010	Cecum	Well differentiated; Grade I	Positive histology	8263/3: Adenocarcinoma in tubulovillous adenoma	Localized	T1	N0	M0	20	0	999	49	0	One primary only	30	No radiation and/or cancer-directed surgery	None/Unknown	No/Unknown	No systemic therapy and/or surgical procedures	Alive or dead of other cause	Alive or dead due to cancer	106	Alive
1185534	Married (including common law)	White	75	Male	2010	Transverse Colon	Poorly differentiated; Grade III	Positive histology	8140/3: Adenocarcinoma, NOS	Distant	T3	N0	M1	999	999	999	0	98	One primary only	0	No radiation and/or cancer-directed surgery	None/Unknown	No/Unknown	No systemic therapy and/or surgical procedures	Dead (attributable to this cancer dx)	Alive or dead due to cancer	0	Dead
1185630	Divorced	White	49	Male	2010	Rectum	Moderately differentiated; Grade II	Positive histology	8140/3: Adenocarcinoma, NOS	Localized	T3	N0	M0	999	999	20	20	0	One primary only	30	Radiation prior to surgery	Beam radiation	Yes	Systemic therapy both before and after surgery	Dead (attributable to this cancer dx)	Alive or dead due to cancer	64	Dead
1185649	Married (including common law)	White	69	Male	2010	Rectum	Moderately differentiated; Grade II	Positive histology	8140/3: Adenocarcinoma, NOS	Distant	T3	N0	M1	999	998	40	0	98	One primary only	0	No radiation and/or cancer-directed surgery	None/Unknown	Yes	No systemic therapy and/or surgical procedures	Dead (attributable to this cancer dx)	Alive or dead due to cancer	38	Dead
1185659	Single (never married)	White	56	Female	2010	Rectosigmoid Junction	Moderately differentiated; Grade II	Positive histology	8140/3: Adenocarcinoma, NOS	Distant	T1	N0	M1	10	998	999	0	98	One primary only	11	No radiation and/or cancer-directed surgery	None/Unknown	Yes	Systemic therapy before surgery	Dead (attributable to this cancer dx)	Alive or dead due to cancer	37	Dead
1185785	Married (including common law)	Other (American Indian/AK Native, Asian/Pacific Islander)	60	Female	2010	Rectum	Moderately differentiated; Grade II	Positive histology	8140/3: Adenocarcinoma, NOS	Regional	T3	N1	M0	999	0	18	16	1	One primary only	30	Radiation after surgery	Beam radiation	Yes	Systemic therapy after surgery	Alive or dead of other cause	Alive or dead due to cancer	82	Alive
1186027	Unknown	White	41	Male	2010	Cecum	Moderately differentiated; Grade II	Positive histology	8140/3: Adenocarcinoma, NOS	Regional	T3	N0	M0	998	0	115	37	0	One primary only	40	No radiation and/or cancer-directed surgery	None/Unknown	No/Unknown	No systemic therapy and/or surgical procedures	Alive or dead of other cause	Alive or dead due to cancer	98	Alive
1186158	Unknown	White	81	Female	2010	Sigmoid Colon	Moderately differentiated; Grade II	Positive histology	8210/3: Adenocarcinoma in adenomatous polyp	Localized	T1	N0	M0	20	999	999	17	0	One primary only	30	No radiation and/or cancer-directed surgery	None/Unknown	No/Unknown	No systemic therapy and/or surgical procedures	Alive or dead of other cause	Alive or dead due to cancer	97	Alive
1186188	Single (never married)	Unknown	42	Female	2010	Rectosigmoid Junction	Poorly differentiated; Grade III	Positive histology	8261/3: Adenocarcinoma in villous adenoma	Regional	T3	N0	M0	20	0	999	15	0	One primary only	40	No radiation and/or cancer-directed surgery	None/Unknown	No/Unknown	No systemic therapy and/or surgical procedures	Alive or dead of other cause	Alive or dead due to cancer	100	Alive
1186241	Married (including common law)	Other (American Indian/AK Native, Asian/Pacific Islander)	68	Male	2010	Descending Colon	Poorly differentiated; Grade III	Positive histology	8210/3: Adenocarcinoma in adenomatous polyp	Localized	T1	N0	M0	20	0	999	11	0	One primary only	30	No radiation and/or cancer-directed surgery	None/Unknown	No/Unknown	No systemic therapy and/or surgical procedures	Alive or dead of other cause	Alive or dead due to cancer	97	Alive
1186280	Single (never married)	White	66	Male	2010	Rectum	Well differentiated; Grade I	Positive histology	8263/3: Adenocarcinoma in tubulovillous adenoma	Localized	T1	N0	M0	20	999	4	0	98	One primary only	30	No radiation and/or cancer-directed surgery	None/Unknown	No/Unknown	No systemic therapy and/or surgical procedures	Alive or dead of other cause	Alive or dead due to cancer	105	Alive
1186283	Married (including common law)	White	70	Male	2010	Sigmoid Colon	Moderately differentiated; Grade II	Positive histology	8140/3: Adenocarcinoma, NOS	Localized	T3	N0	M0	10	0	22	8	0	One primary only	40	No radiation and/or cancer-directed surgery	None/Unknown	No/Unknown	No systemic therapy and/or surgical procedures	Alive or dead of other cause	Alive or dead due to cancer	101	Alive
1186402	Married (including common law)	White	70	Female	2010	Ascending Colon	Moderately differentiated; Grade II	Positive histology	8140/3: Adenocarcinoma, NOS	Localized	T2	N0	M0	10	0	20	52	0	One primary only	40	No radiation and/or cancer-directed surgery	None/Unknown	No/Unknown	No systemic therapy and/or surgical procedures	Alive or dead of other cause	Alive or dead due to cancer	91	Alive
1186412	Married (including common law)	Other (American Indian/AK Native, Asian/Pacific Islander)	48	Male	2010	Rectum	Moderately differentiated; Grade II	Positive histology	8140/3: Adenocarcinoma, NOS	Regional	T3	N1	M0	10	0	50	11	1	One primary only	50	Radiation prior to surgery	Beam radiation	Yes	Systemic therapy both before and after surgery	Alive or dead of other cause	Alive or dead due to cancer	97	Alive
1186461	Single (never married)	Black	56	Female	2011	Cecum	Moderately differentiated; Grade II	Positive histology	8140/3: Adenocarcinoma, NOS	Regional	T3	N0	M0	998	0	25	5	0	One primary only	32	No radiation and/or cancer-directed surgery	None/Unknown	No/Unknown	No systemic therapy and/or surgical procedures	Alive or dead of other cause	Alive or dead due to cancer	95	Alive
1186486	Widowed	Other (American Indian/AK Native, Asian/Pacific Islander)	70	Male	2010	Ascending Colon	Moderately differentiated; Grade II	Positive histology	8140/3: Adenocarcinoma, NOS	Regional	T4	N1	M0	20	0	50	22	1	One primary only	30	No radiation and/or cancer-directed surgery	None/Unknown	Yes	Systemic therapy after surgery	Alive or dead of other cause	Alive or dead due to cancer	96	Alive
1186554	Married (including common law)	Other (American Indian/AK Native, Asian/Pacific Islander)	65	Male	2010	Rectum	Well differentiated; Grade I	Positive histology	8261/3: Adenocarcinoma in villous adenoma	Localized	T1	N0	M0	999	999	999	0	98	One primary only	0	No radiation and/or cancer-directed surgery	None/Unknown	No/Unknown	No systemic therapy and/or surgical procedures	Alive or dead of other cause	Alive or dead due to cancer	98	Alive
1186570	Married (including common law)	White	75	Female	2010	Cecum	Moderately differentiated; Grade II	Positive histology	8140/3: Adenocarcinoma, NOS	Regional	T3	N1	M0	20	0	60	22	2	One primary only	40	No radiation and/or cancer-directed surgery	None/Unknown	Yes	Systemic therapy after surgery	Alive or dead of other cause	Alive or dead due to cancer	102	Alive
1186639	Married (including common law)	Other (American Indian/AK Native, Asian/Pacific Islander)	57	Male	2010	Rectum	Moderately differentiated; Grade II	Positive histology	8140/3: Adenocarcinoma, NOS	Regional	T3	N1	M0	10	0	40	14	0	One primary only	30	Radiation prior to surgery	Beam radiation	Yes	Systemic therapy before surgery	Alive or dead of other cause	Alive or dead due to cancer	99	Alive
1186719	Married (including common law)	White	53	Male	2011	Ascending Colon	Moderately differentiated; Grade II	Positive histology	8481/3: Mucin-producing adenocarcinoma	Localized	T2	N0	M0	10	0	40	25	0	One primary only	40	No radiation and/or cancer-directed surgery	None/Unknown	No/Unknown	No systemic therapy and/or surgical procedures	Alive or dead of other cause	Alive or dead due to cancer	95	Alive
1186735	Widowed	White	85	Female	2011	Rectum	Poorly differentiated; Grade III	Positive histology	8010/3: Carcinoma, NOS	Distant	T3	N1	M1	20	990	999	0	98	One primary only	0	No radiation and/or cancer-directed surgery	Beam radiation	Yes	No systemic therapy and/or surgical procedures	Dead (attributable to this cancer dx)	Alive or dead due to cancer	5	Dead
1186779	Single (never married)	White	80	Female	2011	Hepatic Flexure	Moderately differentiated; Grade II	Positive histology	8140/3: Adenocarcinoma, NOS	Distant	T3	N0	M1	10	0	75	24	0	One primary only	40	No radiation and/or cancer-directed surgery	None/Unknown	Yes	Systemic therapy after surgery	Dead (attributable to this cancer dx)	Alive or dead due to cancer	22	Dead
1186791	Married (including common law)	White	43	Female	2011	Sigmoid Colon	Moderately differentiated; Grade II	Positive histology	8140/3: Adenocarcinoma, NOS	Distant	T4	N2	M1	10	0	28	24	7	One primary only	30	No radiation and/or cancer-directed surgery	None/Unknown	Yes	Systemic therapy after surgery	Dead (attributable to this cancer dx)	Alive or dead due to cancer	66	Dead
1186810	Married (including common law)	Other (American Indian/AK Native, Asian/Pacific Islander)	60	Male	2011	Rectum	Moderately differentiated; Grade II	Positive histology	8140/3: Adenocarcinoma, NOS	Regional	T4	N0	M0	10	0	90	19	0	One primary only	30	Radiation after surgery	Beam radiation	Yes	Systemic therapy after surgery	Alive or dead of other cause	Alive or dead due to cancer	94	Alive
1186894	Married (including common law)	Black	79	Male	2011	Hepatic Flexure	Moderately differentiated; Grade II	Positive histology	8140/3: Adenocarcinoma, NOS	Localized	T3	N0	M0	20	0	35	16	0	One primary only	40	No radiation and/or cancer-directed surgery	None/Unknown	No/Unknown	No systemic therapy and/or surgical procedures	Dead (attributable to this cancer dx)	Alive or dead due to cancer	70	Dead
1186914	Single (never married)	White	41	Female	2011	Rectum	Moderately differentiated; Grade II	Positive histology	8140/3: Adenocarcinoma, NOS	Regional	T4	N2	M0	20	0	62	22	7	One primary only	30	No radiation and/or cancer-directed surgery	None/Unknown	No/Unknown	No systemic therapy and/or surgical procedures	Alive or dead of other cause	Dead (attributable to causes other than this cancer dx)	34	Dead
1186965	Unknown	Other (American Indian/AK Native, Asian/Pacific Islander)	59	Male	2011	Rectum	Moderately differentiated; Grade II	Positive histology	8140/3: Adenocarcinoma, NOS	Localized	T1	N0	M0	20	0	8	0	98	One primary only	30	No radiation and/or cancer-directed surgery	None/Unknown	No/Unknown	No systemic therapy and/or surgical procedures	Alive or dead of other cause	Alive or dead due to cancer	93	Alive
1186974	Unknown	Black	75	Female	2011	Sigmoid Colon	Undifferentiated; anaplastic; Grade IV	Positive histology	8263/3: Adenocarcinoma in tubulovillous adenoma	Regional	T2	N1	M0	20	0	45	20	1	One primary only	40	No radiation and/or cancer-directed surgery	None/Unknown	Yes	Systemic therapy after surgery	Alive or dead of other cause	Alive or dead due to cancer	95	Alive
1186998	Divorced	White	58	Female	2011	Ascending Colon	Moderately differentiated; Grade II	Positive histology	8140/3: Adenocarcinoma, NOS	Localized	T3	N0	M0	20	0	55	20	0	One primary only	40	No radiation and/or cancer-directed surgery	None/Unknown	No/Unknown	No systemic therapy and/or surgical procedures	Alive or dead of other cause	Alive or dead due to cancer	93	Alive
1187026	Unknown	White	71	Male	2010	Sigmoid Colon	Moderately differentiated; Grade II	Positive histology	8140/3: Adenocarcinoma, NOS	Regional	T3	N1	M0	998	0	34	16	1	One primary only	30	No radiation and/or cancer-directed surgery	None/Unknown	No/Unknown	No systemic therapy and/or surgical procedures	Alive or dead of other cause	Dead (attributable to causes other than this cancer dx)	87	Dead
1187056	Unknown	Other (American Indian/AK Native, Asian/Pacific Islander)	57	Male	2010	Sigmoid Colon	Moderately differentiated; Grade II	Positive histology	8140/3: Adenocarcinoma, NOS	Regional	T3	N0	M0	20	0	25	20	0	One primary only	30	No radiation and/or cancer-directed surgery	None/Unknown	No/Unknown	No systemic therapy and/or surgical procedures	Alive or dead of other cause	Alive or dead due to cancer	98	Alive
1187106	Married (including common law)	White	35	Female	2010	Splenic Flexure	Moderately differentiated; Grade II	Positive histology	8261/3: Adenocarcinoma in villous adenoma	Localized	T3	N0	M0	20	0	50	31	0	One primary only	32	No radiation and/or cancer-directed surgery	None/Unknown	No/Unknown	No systemic therapy and/or surgical procedures	Alive or dead of other cause	Alive or dead due to cancer	96	Alive
1187171	Divorced	Other (American Indian/AK Native, Asian/Pacific Islander)	85	Male	2011	Sigmoid Colon	Moderately differentiated; Grade II	Positive histology	8140/3: Adenocarcinoma, NOS	Localized	T2	N0	M0	998	0	31	13	0	One primary only	30	No radiation and/or cancer-directed surgery	None/Unknown	No/Unknown	No systemic therapy and/or surgical procedures	Dead (attributable to this cancer dx)	Alive or dead due to cancer	0	Dead
1187214	Single (never married)	Other (American Indian/AK Native, Asian/Pacific Islander)	57	Male	2011	Sigmoid Colon	Moderately differentiated; Grade II	Positive histology	8140/3: Adenocarcinoma, NOS	Localized	T3	N0	M0	20	0	45	10	0	One primary only	30	No radiation and/or cancer-directed surgery	None/Unknown	No/Unknown	No systemic therapy and/or surgical procedures	Dead (attributable to this cancer dx)	Alive or dead due to cancer	34	Dead
1187279	Married (including common law)	Other (American Indian/AK Native, Asian/Pacific Islander)	53	Female	2011	Transverse Colon	Moderately differentiated; Grade II	Positive histology	8140/3: Adenocarcinoma, NOS	Localized	T3	N0	M0	10	0	60	21	0	One primary only	30	No radiation and/or cancer-directed surgery	None/Unknown	No/Unknown	No systemic therapy and/or surgical procedures	Alive or dead of other cause	Alive or dead due to cancer	94	Alive
1187303	Married (including common law)	White	81	Female	2011	Sigmoid Colon	Moderately differentiated; Grade II	Positive histology	8210/3: Adenocarcinoma in adenomatous polyp	Localized	T1	N0	M0	998	0	12	6	0	One primary only	30	No radiation and/or cancer-directed surgery	None/Unknown	No/Unknown	No systemic therapy and/or surgical procedures	Alive or dead of other cause	Alive or dead due to cancer	95	Alive
1187412	Single (never married)	White	72	Female	2011	Cecum	Moderately differentiated; Grade II	Positive histology	8140/3: Adenocarcinoma, NOS	Distant	T3	N0	M1	10	0	999	12	0	One primary only	40	No radiation and/or cancer-directed surgery	None/Unknown	Yes	Systemic therapy after surgery	Dead (attributable to this cancer dx)	Alive or dead due to cancer	50	Dead
1187417	Unknown	White	83	Male	2011	Ascending Colon	Moderately differentiated; Grade II	Positive histology	8140/3: Adenocarcinoma, NOS	Localized	T2	N0	M0	20	0	999	6	0	One primary only	40	No radiation and/or cancer-directed surgery	None/Unknown	No/Unknown	No systemic therapy and/or surgical procedures	Alive or dead of other cause	Alive or dead due to cancer	59	Alive
1187422	Widowed	White	85	Female	2011	Cecum	Poorly differentiated; Grade III	Positive histology	8140/3: Adenocarcinoma, NOS	Regional	T3	N2	M0	10	0	999	6	4	One primary only	30	No radiation and/or cancer-directed surgery	None/Unknown	No/Unknown	No systemic therapy and/or surgical procedures	Dead (attributable to this cancer dx)	Alive or dead due to cancer	0	Dead
1187473	Married (including common law)	White	60	Female	2011	Ascending Colon	Moderately differentiated; Grade II	Positive histology	8210/3: Adenocarcinoma in adenomatous polyp	Localized	T1	N0	M0	20	0	25	15	0	One primary only	30	No radiation and/or cancer-directed surgery	None/Unknown	No/Unknown	No systemic therapy and/or surgical procedures	Alive or dead of other cause	Alive or dead due to cancer	95	Alive
1187475	Married (including common law)	Other (American Indian/AK Native, Asian/Pacific Islander)	51	Male	2011	Cecum	Poorly differentiated; Grade III	Positive histology	8140/3: Adenocarcinoma, NOS	Regional	T3	N2	M0	10	990	50	13	4	One primary only	40	No radiation and/or cancer-directed surgery	None/Unknown	Yes	Systemic therapy after surgery	Alive or dead of other cause	Alive or dead due to cancer	90	Alive
1187507	Widowed	Black	83	Female	2011	Sigmoid Colon	Moderately differentiated; Grade II	Positive histology	8140/3: Adenocarcinoma, NOS	Regional	T3	N0	M0	998	0	50	11	0	One primary only	30	No radiation and/or cancer-directed surgery	None/Unknown	No/Unknown	No systemic therapy and/or surgical procedures	Dead (attributable to this cancer dx)	Alive or dead due to cancer	33	Dead
1187559	Single (never married)	Other (American Indian/AK Native, Asian/Pacific Islander)	83	Female	2011	Cecum	Moderately differentiated; Grade II	Positive histology	8140/3: Adenocarcinoma, NOS	Regional	T4	N1	M0	10	0	90	14	1	One primary only	80	No radiation and/or cancer-directed surgery	None/Unknown	No/Unknown	No systemic therapy and/or surgical procedures	Dead (missing/unknown COD)	Dead (missing/unknown COD)	24	Dead
1187585	Married (including common law)	White	72	Male	2011	Ascending Colon	Moderately differentiated; Grade II	Positive histology	8140/3: Adenocarcinoma, NOS	Regional	T3	N1	M0	998	0	70	4	3	One primary only	40	No radiation and/or cancer-directed surgery	None/Unknown	No/Unknown	No systemic therapy and/or surgical procedures	Alive or dead of other cause	Alive or dead due to cancer	93	Alive
1187635	Divorced	White	55	Male	2010	Descending Colon	Moderately differentiated; Grade II	Positive histology	8140/3: Adenocarcinoma, NOS	Localized	T3	N0	M0	999	0	40	18	0	One primary only	40	No radiation and/or cancer-directed surgery	None/Unknown	No/Unknown	No systemic therapy and/or surgical procedures	Alive or dead of other cause	Alive or dead due to cancer	96	Alive
1187646	Married (including common law)	Other (American Indian/AK Native, Asian/Pacific Islander)	79	Male	2011	Sigmoid Colon	Moderately differentiated; Grade II	Positive histology	8140/3: Adenocarcinoma, NOS	Localized	T3	N0	M0	20	0	25	12	0	One primary only	30	No radiation and/or cancer-directed surgery	None/Unknown	No/Unknown	No systemic therapy and/or surgical procedures	Alive or dead of other cause	Alive or dead due to cancer	30	Alive
1187707	Married (including common law)	White	50	Male	2010	Ascending Colon	Poorly differentiated; Grade III	Positive histology	8140/3: Adenocarcinoma, NOS	Distant	T4	N1	M1	10	998	50	0	98	One primary only	0	No radiation and/or cancer-directed surgery	None/Unknown	Yes	No systemic therapy and/or surgical procedures	Dead (attributable to this cancer dx)	Alive or dead due to cancer	12	Dead
1187723	Married (including common law)	Other (American Indian/AK Native, Asian/Pacific Islander)	57	Female	2011	Sigmoid Colon	Moderately differentiated; Grade II	Positive histology	8140/3: Adenocarcinoma, NOS	Regional	T3	N1	M0	20	0	50	33	3	One primary only	30	No radiation and/or cancer-directed surgery	None/Unknown	Yes	Systemic therapy after surgery	Alive or dead of other cause	Alive or dead due to cancer	95	Alive
1187764	Unknown	White	45	Female	2010	Sigmoid Colon	Moderately differentiated; Grade II	Positive histology	8140/3: Adenocarcinoma, NOS	Regional	T3	N2	M0	20	0	65	39	4	One primary only	30	No radiation and/or cancer-directed surgery	None/Unknown	Yes	Systemic therapy after surgery	Alive or dead of other cause	Alive or dead due to cancer	94	Alive
1187767	Single (never married)	White	59	Male	2010	Sigmoid Colon	Well differentiated; Grade I	Positive histology	8140/3: Adenocarcinoma, NOS	Distant	T4	N1	M1	20	999	34	19	3	One primary only	30	No radiation and/or cancer-directed surgery	None/Unknown	Yes	Systemic therapy after surgery	Alive or dead of other cause	Alive or dead due to cancer	97	Alive
1187798	Single (never married)	Black	47	Female	2010	Sigmoid Colon	Moderately differentiated; Grade II	Positive histology	8140/3: Adenocarcinoma, NOS	Regional	T1	N1	M0	20	0	20	15	2	One primary only	30	No radiation and/or cancer-directed surgery	None/Unknown	Yes	Systemic therapy after surgery	Alive or dead of other cause	Alive or dead due to cancer	103	Alive
1187951	Married (including common law)	White	61	Female	2011	Rectum	Well differentiated; Grade I	Positive histology	8140/3: Adenocarcinoma, NOS	Localized	T3	N0	M0	20	0	70	8	0	One primary only	30	Radiation prior to surgery	Beam radiation	Yes	Systemic therapy before surgery	Alive or dead of other cause	Alive or dead due to cancer	94	Alive
1187975	Single (never married)	Other (American Indian/AK Native, Asian/Pacific Islander)	61	Male	2011	Rectosigmoid Junction	Well differentiated; Grade I	Positive histology	8140/3: Adenocarcinoma, NOS	Regional	T3	N1	M0	20	0	57	26	3	One primary only	30	No radiation and/or cancer-directed surgery	None/Unknown	No/Unknown	No systemic therapy and/or surgical procedures	Alive or dead of other cause	Alive or dead due to cancer	94	Alive
1187977	Widowed	White	73	Female	2011	Hepatic Flexure	Well differentiated; Grade I	Positive histology	8210/3: Adenocarcinoma in adenomatous polyp	Localized	T1	N0	M0	20	0	6	30	0	One primary only	40	No radiation and/or cancer-directed surgery	None/Unknown	No/Unknown	No systemic therapy and/or surgical procedures	Alive or dead of other cause	Alive or dead due to cancer	93	Alive
1187979	Single (never married)	White	67	Female	2011	Cecum	Moderately differentiated; Grade II	Positive histology	8263/3: Adenocarcinoma in tubulovillous adenoma	Localized	T1	N0	M0	20	0	25	21	0	One primary only	40	No radiation and/or cancer-directed surgery	None/Unknown	No/Unknown	No systemic therapy and/or surgical procedures	Alive or dead of other cause	Alive or dead due to cancer	94	Alive
1188038	Married (including common law)	Other (American Indian/AK Native, Asian/Pacific Islander)	46	Female	2010	Descending Colon	Moderately differentiated; Grade II	Positive histology	8140/3: Adenocarcinoma, NOS	Regional	T3	N0	M0	20	0	30	9	0	One primary only	40	No radiation and/or cancer-directed surgery	None/Unknown	No/Unknown	No systemic therapy and/or surgical procedures	Alive or dead of other cause	Alive or dead due to cancer	78	Alive
1188059	Unknown	Other (American Indian/AK Native, Asian/Pacific Islander)	69	Female	2010	Cecum	Moderately differentiated; Grade II	Positive histology	8210/3: Adenocarcinoma in adenomatous polyp	Distant	T1	N2	M1	10	0	28	13	6	One primary only	40	No radiation and/or cancer-directed surgery	None/Unknown	Yes	Systemic therapy after surgery	Dead (attributable to this cancer dx)	Alive or dead due to cancer	57	Dead
1188184	Married (including common law)	Other (American Indian/AK Native, Asian/Pacific Islander)	73	Male	2010	Sigmoid Colon	Moderately differentiated; Grade II	Positive histology	8140/3: Adenocarcinoma, NOS	Regional	T2	N1	M0	998	0	15	1	1	One primary only	30	No radiation and/or cancer-directed surgery	None/Unknown	No/Unknown	No systemic therapy and/or surgical procedures	Dead (attributable to this cancer dx)	Alive or dead due to cancer	1	Dead
1188314	Divorced	White	56	Female	2011	Appendix	Poorly differentiated; Grade III	Positive histology	8490/3: Signet ring cell carcinoma	Distant	T4	N1	M0	997	990	40	11	1	One primary only	40	No radiation and/or cancer-directed surgery	None/Unknown	Yes	Systemic therapy after surgery	Dead (attributable to this cancer dx)	Alive or dead due to cancer	14	Dead
1188336	Married (including common law)	Other (American Indian/AK Native, Asian/Pacific Islander)	50	Female	2011	Ascending Colon	Well differentiated; Grade I	Positive histology	8263/3: Adenocarcinoma in tubulovillous adenoma	Regional	T4	N0	M0	998	0	2	10	0	One primary only	40	No radiation and/or cancer-directed surgery	None/Unknown	No/Unknown	No systemic therapy and/or surgical procedures	Alive or dead of other cause	Alive or dead due to cancer	94	Alive
1188339	Married (including common law)	Other (American Indian/AK Native, Asian/Pacific Islander)	78	Male	2011	Cecum	Moderately differentiated; Grade II	Positive histology	8210/3: Adenocarcinoma in adenomatous polyp	Localized	T1	N0	M0	20	0	35	5	0	One primary only	40	No radiation and/or cancer-directed surgery	None/Unknown	No/Unknown	No systemic therapy and/or surgical procedures	Alive or dead of other cause	Alive or dead due to cancer	87	Alive
1188381	Divorced	White	59	Female	2011	Sigmoid Colon	Moderately differentiated; Grade II	Positive histology	8140/3: Adenocarcinoma, NOS	Localized	T1	N0	M0	998	0	999	3	0	One primary only	30	No radiation and/or cancer-directed surgery	None/Unknown	No/Unknown	No systemic therapy and/or surgical procedures	Alive or dead of other cause	Alive or dead due to cancer	91	Alive
1188386	Married (including common law)	Other (American Indian/AK Native, Asian/Pacific Islander)	73	Male	2011	Ascending Colon	Well differentiated; Grade I	Positive histology	8210/3: Adenocarcinoma in adenomatous polyp	Localized	T1	N0	M0	20	0	25	1	0	One primary only	30	No radiation and/or cancer-directed surgery	None/Unknown	No/Unknown	No systemic therapy and/or surgical procedures	Alive or dead of other cause	Alive or dead due to cancer	67	Alive
1188387	Married (including common law)	Other (American Indian/AK Native, Asian/Pacific Islander)	71	Male	2011	Sigmoid Colon	Moderately differentiated; Grade II	Positive histology	8210/3: Adenocarcinoma in adenomatous polyp	Localized	T1	N0	M0	998	0	999	6	0	One primary only	30	No radiation and/or cancer-directed surgery	None/Unknown	No/Unknown	No systemic therapy and/or surgical procedures	Alive or dead of other cause	Alive or dead due to cancer	91	Alive
1188557	Single (never married)	Black	46	Female	2011	Cecum	Moderately differentiated; Grade II	Positive histology	8140/3: Adenocarcinoma, NOS	Distant	T3	N1	M1	10	5	40	10	1	One primary only	90	No radiation and/or cancer-directed surgery	None/Unknown	Yes	Systemic therapy both before and after surgery	Dead (attributable to this cancer dx)	Alive or dead due to cancer	33	Dead
1188603	Married (including common law)	Other (American Indian/AK Native, Asian/Pacific Islander)	41	Female	2010	Sigmoid Colon	Moderately differentiated; Grade II	Positive histology	8140/3: Adenocarcinoma, NOS	Regional	T3	N0	M0	10	0	95	15	0	One primary only	32	No radiation and/or cancer-directed surgery	None/Unknown	No/Unknown	No systemic therapy and/or surgical procedures	Dead (attributable to this cancer dx)	Alive or dead due to cancer	87	Dead
1188606	Separated	Other (American Indian/AK Native, Asian/Pacific Islander)	74	Male	2010	Sigmoid Colon	Moderately differentiated; Grade II	Positive histology	8140/3: Adenocarcinoma, NOS	Localized	T3	N0	M0	10	0	22	10	0	One primary only	40	No radiation and/or cancer-directed surgery	None/Unknown	No/Unknown	No systemic therapy and/or surgical procedures	Alive or dead of other cause	Alive or dead due to cancer	102	Alive
1188608	Widowed	White	85	Male	2010	Transverse Colon	Well differentiated; Grade I	Positive histology	8263/3: Adenocarcinoma in tubulovillous adenoma	Localized	T3	N0	M0	20	0	30	12	0	One primary only	30	No radiation and/or cancer-directed surgery	None/Unknown	No/Unknown	No systemic therapy and/or surgical procedures	Alive or dead of other cause	Dead (attributable to causes other than this cancer dx)	26	Dead
1188610	Widowed	White	83	Female	2010	Ascending Colon	Moderately differentiated; Grade II	Positive histology	8140/3: Adenocarcinoma, NOS	Regional	T3	N1	M0	20	0	55	20	1	One primary only	30	No radiation and/or cancer-directed surgery	None/Unknown	No/Unknown	No systemic therapy and/or surgical procedures	Alive or dead of other cause	Alive or dead due to cancer	101	Alive
1188632	Married (including common law)	Black	67	Male	2010	Appendix	Moderately differentiated; Grade II	Positive histology	8140/3: Adenocarcinoma, NOS	Localized	T1	N0	M0	998	0	10	23	0	One primary only	30	No radiation and/or cancer-directed surgery	None/Unknown	No/Unknown	No systemic therapy and/or surgical procedures	Alive or dead of other cause	Alive or dead due to cancer	102	Alive
1188645	Single (never married)	Black	55	Male	2010	Rectum	Moderately differentiated; Grade II	Positive histology	8480/3: Mucinous adenocarcinoma	Regional	T1	N1	M0	20	1	17	9	2	One primary only	30	Radiation after surgery	Beam radiation	Yes	Systemic therapy both before and after surgery	Alive or dead of other cause	Alive or dead due to cancer	102	Alive
1188663	Widowed	White	80	Female	2011	Ascending Colon	Moderately differentiated; Grade II	Positive histology	8140/3: Adenocarcinoma, NOS	Regional	T3	N0	M0	10	0	58	29	0	One primary only	40	No radiation and/or cancer-directed surgery	None/Unknown	No/Unknown	No systemic therapy and/or surgical procedures	Alive or dead of other cause	Alive or dead due to cancer	36	Alive
1188665	Married (including common law)	Other (American Indian/AK Native, Asian/Pacific Islander)	66	Female	2011	Ascending Colon	Moderately differentiated; Grade II	Positive histology	8140/3: Adenocarcinoma, NOS	Regional	T3	N1	M0	10	0	25	19	2	One primary only	40	No radiation and/or cancer-directed surgery	None/Unknown	Yes	Systemic therapy after surgery	Alive or dead of other cause	Alive or dead due to cancer	95	Alive
1188678	Single (never married)	White	70	Male	2011	Splenic Flexure	Moderately differentiated; Grade II	Positive histology	8140/3: Adenocarcinoma, NOS	Distant	T3	N1	M1	999	998	79	0	98	One primary only	0	No radiation and/or cancer-directed surgery	None/Unknown	No/Unknown	No systemic therapy and/or surgical procedures	Dead (attributable to this cancer dx)	Alive or dead due to cancer	3	Dead
1188709	Single (never married)	White	73	Female	2010	Cecum	Moderately differentiated; Grade II	Positive histology	8140/3: Adenocarcinoma, NOS	Localized	T2	N0	M0	20	0	33	17	0	One primary only	40	No radiation and/or cancer-directed surgery	None/Unknown	No/Unknown	No systemic therapy and/or surgical procedures	Alive or dead of other cause	Alive or dead due to cancer	99	Alive
1188765	Married (including common law)	White	50	Male	2010	Rectosigmoid Junction	Moderately differentiated; Grade II	Positive histology	8263/3: Adenocarcinoma in tubulovillous adenoma	Localized	T1	N0	M0	20	0	2	12	0	One primary only	30	No radiation and/or cancer-directed surgery	None/Unknown	No/Unknown	No systemic therapy and/or surgical procedures	Alive or dead of other cause	Alive or dead due to cancer	99	Alive
1188803	Separated	White	68	Male	2010	Ascending Colon	Moderately differentiated; Grade II	Positive histology	8140/3: Adenocarcinoma, NOS	Regional	T3	N1	M0	10	1	36	14	2	One primary only	40	No radiation and/or cancer-directed surgery	None/Unknown	Yes	Systemic therapy after surgery	Dead (attributable to this cancer dx)	Alive or dead due to cancer	63	Dead
1188857	Widowed	White	85	Female	2010	Ascending Colon	Well differentiated; Grade I	Positive histology	8480/3: Mucinous adenocarcinoma	Distant	T3	N2	M1	999	999	45	12	6	One primary only	30	No radiation and/or cancer-directed surgery	None/Unknown	No/Unknown	No systemic therapy and/or surgical procedures	Alive or dead of other cause	Dead (attributable to causes other than this cancer dx)	1	Dead
1188912	Widowed	White	85	Female	2011	Cecum	Moderately differentiated; Grade II	Positive histology	8263/3: Adenocarcinoma in tubulovillous adenoma	Regional	T1	N1	M0	998	0	12	8	1	One primary only	40	No radiation and/or cancer-directed surgery	None/Unknown	No/Unknown	No systemic therapy and/or surgical procedures	Dead (attributable to this cancer dx)	Alive or dead due to cancer	18	Dead
1188984	Unknown	White	44	Female	2010	Sigmoid Colon	Well differentiated; Grade I	Positive histology	8263/3: Adenocarcinoma in tubulovillous adenoma	Localized	T1	N0	M0	20	0	999	9	0	One primary only	30	No radiation and/or cancer-directed surgery	None/Unknown	No/Unknown	No systemic therapy and/or surgical procedures	Alive or dead of other cause	Alive or dead due to cancer	16	Alive
1188993	Married (including common law)	White	64	Male	2010	Sigmoid Colon	Moderately differentiated; Grade II	Positive histology	8140/3: Adenocarcinoma, NOS	Localized	T3	N0	M0	10	0	60	21	0	One primary only	30	No radiation and/or cancer-directed surgery	None/Unknown	No/Unknown	No systemic therapy and/or surgical procedures	Alive or dead of other cause	Alive or dead due to cancer	105	Alive
1189110	Married (including common law)	White	57	Female	2011	Ascending Colon	Moderately differentiated; Grade II	Positive histology	8263/3: Adenocarcinoma in tubulovillous adenoma	Localized	T2	N0	M0	20	0	36	14	0	One primary only	40	No radiation and/or cancer-directed surgery	None/Unknown	No/Unknown	No systemic therapy and/or surgical procedures	Alive or dead of other cause	Alive or dead due to cancer	94	Alive
1189118	Married (including common law)	Other (American Indian/AK Native, Asian/Pacific Islander)	68	Male	2011	Transverse Colon	Moderately differentiated; Grade II	Positive histology	8140/3: Adenocarcinoma, NOS	Localized	T3	N0	M0	10	0	51	12	0	One primary only	40	No radiation and/or cancer-directed surgery	None/Unknown	No/Unknown	No systemic therapy and/or surgical procedures	Alive or dead of other cause	Alive or dead due to cancer	94	Alive
1189120	Separated	White	60	Male	2011	Sigmoid Colon	Moderately differentiated; Grade II	Positive histology	8261/3: Adenocarcinoma in villous adenoma	Localized	T3	N0	M0	20	0	35	18	0	One primary only	40	No radiation and/or cancer-directed surgery	None/Unknown	No/Unknown	No systemic therapy and/or surgical procedures	Alive or dead of other cause	Alive or dead due to cancer	95	Alive
1189136	Married (including common law)	Other (American Indian/AK Native, Asian/Pacific Islander)	61	Female	2011	Ascending Colon	Moderately differentiated; Grade II	Positive histology	8140/3: Adenocarcinoma, NOS	Localized	T2	N0	M0	10	0	30	17	0	One primary only	40	No radiation and/or cancer-directed surgery	None/Unknown	No/Unknown	No systemic therapy and/or surgical procedures	Alive or dead of other cause	Alive or dead due to cancer	94	Alive
1189191	Married (including common law)	White	68	Male	2010	Ascending Colon	Moderately differentiated; Grade II	Positive histology	8140/3: Adenocarcinoma, NOS	Localized	T1	N0	M0	20	0	18	19	0	One primary only	40	No radiation and/or cancer-directed surgery	None/Unknown	No/Unknown	No systemic therapy and/or surgical procedures	Alive or dead of other cause	Alive or dead due to cancer	96	Alive
1189232	Divorced	Other (American Indian/AK Native, Asian/Pacific Islander)	83	Male	2010	Cecum	Moderately differentiated; Grade II	Positive histology	8480/3: Mucinous adenocarcinoma	Localized	T3	N0	M0	10	0	50	14	0	One primary only	40	No radiation and/or cancer-directed surgery	None/Unknown	No/Unknown	No systemic therapy and/or surgical procedures	Alive or dead of other cause	Alive or dead due to cancer	103	Alive
1189263	Divorced	White	81	Male	2010	Cecum	Moderately differentiated; Grade II	Positive histology	8140/3: Adenocarcinoma, NOS	Localized	T3	N0	M0	10	0	60	19	0	One primary only	40	No radiation and/or cancer-directed surgery	None/Unknown	No/Unknown	No systemic therapy and/or surgical procedures	Alive or dead of other cause	Dead (attributable to causes other than this cancer dx)	37	Dead
1189382	Single (never married)	Black	85	Female	2011	Cecum	Moderately differentiated; Grade II	Positive histology	8140/3: Adenocarcinoma, NOS	Distant	T3	N2	M1	10	990	25	19	7	One primary only	40	No radiation and/or cancer-directed surgery	None/Unknown	No/Unknown	No systemic therapy and/or surgical procedures	Dead (attributable to this cancer dx)	Alive or dead due to cancer	1	Dead
1189450	Single (never married)	White	50	Male	2011	Sigmoid Colon	Moderately differentiated; Grade II	Positive histology	8140/3: Adenocarcinoma, NOS	Localized	T2	N0	M0	998	0	14	14	0	One primary only	30	No radiation and/or cancer-directed surgery	None/Unknown	No/Unknown	No systemic therapy and/or surgical procedures	Alive or dead of other cause	Alive or dead due to cancer	95	Alive
1189472	Separated	White	43	Male	2011	Ascending Colon	Moderately differentiated; Grade II	Positive histology	8140/3: Adenocarcinoma, NOS	Regional	T3	N1	M0	20	0	75	24	2	One primary only	30	No radiation and/or cancer-directed surgery	None/Unknown	Yes	Systemic therapy after surgery	Alive or dead of other cause	Alive or dead due to cancer	19	Alive
1189488	Single (never married)	White	42	Female	2011	Ascending Colon	Poorly differentiated; Grade III	Positive histology	8140/3: Adenocarcinoma, NOS	Regional	T3	N2	M0	20	999	25	20	7	One primary only	40	No radiation and/or cancer-directed surgery	None/Unknown	No/Unknown	No systemic therapy and/or surgical procedures	Alive or dead of other cause	Alive or dead due to cancer	17	Alive
1189521	Married (including common law)	Black	65	Male	2010	Sigmoid Colon	Moderately differentiated; Grade II	Positive histology	8140/3: Adenocarcinoma, NOS	Distant	T3	N0	M1	10	0	65	12	0	One primary only	30	No radiation and/or cancer-directed surgery	None/Unknown	No/Unknown	No systemic therapy and/or surgical procedures	Dead (attributable to this cancer dx)	Alive or dead due to cancer	10	Dead
1189527	Married (including common law)	White	52	Female	2010	Rectum	Moderately differentiated; Grade II	Positive histology	8140/3: Adenocarcinoma, NOS	Distant	T4	N0	M0	10	0	90	20	0	One primary only	70	No radiation and/or cancer-directed surgery	None/Unknown	Yes	Systemic therapy after surgery	Alive or dead of other cause	Alive or dead due to cancer	98	Alive
1189536	Married (including common law)	Other (American Indian/AK Native, Asian/Pacific Islander)	65	Male	2010	Sigmoid Colon	Moderately differentiated; Grade II	Positive histology	8210/3: Adenocarcinoma in adenomatous polyp	Localized	T1	N0	M0	999	0	15	9	0	One primary only	30	No radiation and/or cancer-directed surgery	None/Unknown	No/Unknown	No systemic therapy and/or surgical procedures	Alive or dead of other cause	Alive or dead due to cancer	96	Alive
1189586	Married (including common law)	Other (American Indian/AK Native, Asian/Pacific Islander)	54	Female	2010	Rectosigmoid Junction	Moderately differentiated; Grade II	Positive histology	8140/3: Adenocarcinoma, NOS	Regional	T3	N1	M0	999	0	30	10	1	One primary only	30	Radiation prior to surgery	Beam radiation	Yes	Systemic therapy before surgery	Dead (attributable to this cancer dx)	Alive or dead due to cancer	58	Dead
1189587	Married (including common law)	Other (American Indian/AK Native, Asian/Pacific Islander)	85	Male	2010	Rectosigmoid Junction	Moderately differentiated; Grade II	Positive histology	8140/3: Adenocarcinoma, NOS	Regional	T3	N0	M0	998	0	60	21	0	One primary only	30	No radiation and/or cancer-directed surgery	None/Unknown	No/Unknown	No systemic therapy and/or surgical procedures	Dead (attributable to this cancer dx)	Alive or dead due to cancer	10	Dead
1189602	Married (including common law)	White	40	Female	2010	Sigmoid Colon	Moderately differentiated; Grade II	Positive histology	8140/3: Adenocarcinoma, NOS	Distant	T3	N1	M1	10	0	59	13	2	One primary only	30	No radiation and/or cancer-directed surgery	None/Unknown	Yes	Systemic therapy after surgery	Dead (attributable to this cancer dx)	Alive or dead due to cancer	44	Dead
1189702	Married (including common law)	Other (American Indian/AK Native, Asian/Pacific Islander)	84	Male	2011	Ascending Colon	Moderately differentiated; Grade II	Positive histology	8140/3: Adenocarcinoma, NOS	Localized	T2	N0	M0	20	0	40	13	0	One primary only	40	No radiation and/or cancer-directed surgery	None/Unknown	No/Unknown	No systemic therapy and/or surgical procedures	Alive or dead of other cause	Alive or dead due to cancer	95	Alive
1189806	Married (including common law)	White	63	Female	2011	Descending Colon	Poorly differentiated; Grade III	Positive histology	8140/3: Adenocarcinoma, NOS	Regional	T4	N2	M0	20	990	170	33	11	One primary only	30	No radiation and/or cancer-directed surgery	None/Unknown	No/Unknown	No systemic therapy and/or surgical procedures	Dead (attributable to this cancer dx)	Alive or dead due to cancer	14	Dead
1189815	Married (including common law)	Black	66	Male	2011	Sigmoid Colon	Moderately differentiated; Grade II	Positive histology	8263/3: Adenocarcinoma in tubulovillous adenoma	Localized	T1	N0	M0	999	0	999	2	0	One primary only	30	No radiation and/or cancer-directed surgery	None/Unknown	No/Unknown	No systemic therapy and/or surgical procedures	Alive or dead of other cause	Alive or dead due to cancer	95	Alive
1189843	Married (including common law)	White	59	Male	2011	Rectosigmoid Junction	Moderately differentiated; Grade II	Positive histology	8140/3: Adenocarcinoma, NOS	Localized	T3	N0	M0	20	0	46	19	0	One primary only	30	No radiation and/or cancer-directed surgery	None/Unknown	No/Unknown	No systemic therapy and/or surgical procedures	Alive or dead of other cause	Alive or dead due to cancer	95	Alive
1189909	Widowed	White	85	Female	2011	Hepatic Flexure	Poorly differentiated; Grade III	Positive histology	8490/3: Signet ring cell carcinoma	Distant	T4	N1	M1	10	0	90	13	3	One primary only	40	No radiation and/or cancer-directed surgery	None/Unknown	No/Unknown	No systemic therapy and/or surgical procedures	Dead (attributable to this cancer dx)	Alive or dead due to cancer	6	Dead
1189968	Widowed	White	63	Female	2011	Sigmoid Colon	Moderately differentiated; Grade II	Positive histology	8140/3: Adenocarcinoma, NOS	Localized	T3	N0	M0	20	0	50	21	0	One primary only	30	No radiation and/or cancer-directed surgery	None/Unknown	No/Unknown	No systemic therapy and/or surgical procedures	Alive or dead of other cause	Alive or dead due to cancer	88	Alive
1189971	Single (never married)	White	54	Male	2011	Cecum	Moderately differentiated; Grade II	Positive histology	8261/3: Adenocarcinoma in villous adenoma	Regional	T3	N2	M0	20	0	70	38	4	One primary only	40	No radiation and/or cancer-directed surgery	None/Unknown	No/Unknown	No systemic therapy and/or surgical procedures	Dead (attributable to this cancer dx)	Alive or dead due to cancer	58	Dead
1189978	Married (including common law)	Other (American Indian/AK Native, Asian/Pacific Islander)	60	Female	2010	Sigmoid Colon	Moderately differentiated; Grade II	Positive histology	8140/3: Adenocarcinoma, NOS	Regional	T4	N1	M0	20	0	60	20	3	One primary only	30	No radiation and/or cancer-directed surgery	None/Unknown	Yes	Systemic therapy after surgery	Alive or dead of other cause	Alive or dead due to cancer	101	Alive
1189980	Unknown	White	85	Female	2010	Cecum	Undifferentiated; anaplastic; Grade IV	Positive histology	8010/3: Carcinoma, NOS	Distant	T3	N0	M1	10	998	999	0	98	One primary only	0	No radiation and/or cancer-directed surgery	None/Unknown	No/Unknown	No systemic therapy and/or surgical procedures	Dead (attributable to this cancer dx)	Alive or dead due to cancer	0	Dead
1190041	Divorced	Black	59	Male	2011	Cecum	Poorly differentiated; Grade III	Positive histology	8140/3: Adenocarcinoma, NOS	Regional	T3	N0	M0	20	0	38	17	0	One primary only	40	No radiation and/or cancer-directed surgery	None/Unknown	No/Unknown	No systemic therapy and/or surgical procedures	Dead (attributable to this cancer dx)	Alive or dead due to cancer	50	Dead
1190192	Widowed	Black	85	Female	2011	Cecum	Moderately differentiated; Grade II	Positive histology	8480/3: Mucinous adenocarcinoma	Localized	T3	N0	M0	999	0	65	15	0	One primary only	40	No radiation and/or cancer-directed surgery	None/Unknown	No/Unknown	No systemic therapy and/or surgical procedures	Alive or dead of other cause	Dead (attributable to causes other than this cancer dx)	74	Dead
1190248	Unknown	Other (American Indian/AK Native, Asian/Pacific Islander)	70	Female	2010	Cecum	Moderately differentiated; Grade II	Positive histology	8140/3: Adenocarcinoma, NOS	Regional	T2	N1	M0	20	0	25	12	2	One primary only	30	No radiation and/or cancer-directed surgery	None/Unknown	Yes	Systemic therapy after surgery	Alive or dead of other cause	Alive or dead due to cancer	96	Alive
1190260	Married (including common law)	White	74	Female	2010	Cecum	Moderately differentiated; Grade II	Positive histology	8263/3: Adenocarcinoma in tubulovillous adenoma	Localized	T1	N0	M0	20	0	990	45	0	One primary only	32	No radiation and/or cancer-directed surgery	None/Unknown	No/Unknown	No systemic therapy and/or surgical procedures	Alive or dead of other cause	Alive or dead due to cancer	97	Alive
1190302	Married (including common law)	White	59	Male	2010	Rectum	Moderately differentiated; Grade II	Positive histology	8140/3: Adenocarcinoma, NOS	Regional	T3	N1	M0	998	0	999	8	0	One primary only	50	Radiation prior to surgery	Beam radiation	Yes	Systemic therapy before surgery	Dead (attributable to this cancer dx)	Alive or dead due to cancer	73	Dead
1190304	Married (including common law)	Other (American Indian/AK Native, Asian/Pacific Islander)	62	Male	2010	Rectum	Moderately differentiated; Grade II	Positive histology	8140/3: Adenocarcinoma, NOS	Regional	T3	N0	M0	10	999	40	0	98	One primary only	30	Radiation prior to surgery	Beam radiation	Yes	Systemic therapy before surgery	Alive or dead of other cause	Alive or dead due to cancer	101	Alive
1190314	Married (including common law)	White	78	Male	2010	Splenic Flexure	Moderately differentiated; Grade II	Positive histology	8140/3: Adenocarcinoma, NOS	Distant	T1	N1	M1	10	0	20	0	98	One primary only	0	No radiation and/or cancer-directed surgery	None/Unknown	Yes	No systemic therapy and/or surgical procedures	Dead (attributable to this cancer dx)	Alive or dead due to cancer	3	Dead
1190434	Widowed	Black	67	Female	2011	Hepatic Flexure	Moderately differentiated; Grade II	Positive histology	8255/3: Adenocarcinoma with mixed subtypes	Distant	T4	N2	M1	10	0	52	9	8	One primary only	41	No radiation and/or cancer-directed surgery	None/Unknown	Yes	Systemic therapy after surgery	Dead (missing/unknown COD)	Dead (missing/unknown COD)	5	Dead
1190435	Married (including common law)	White	44	Female	2011	Sigmoid Colon	Moderately differentiated; Grade II	Positive histology	8140/3: Adenocarcinoma, NOS	Localized	T2	N0	M0	20	0	41	40	0	One primary only	30	No radiation and/or cancer-directed surgery	None/Unknown	No/Unknown	No systemic therapy and/or surgical procedures	Alive or dead of other cause	Alive or dead due to cancer	85	Alive
1190463	Married (including common law)	White	62	Female	2011	Ascending Colon	Well differentiated; Grade I	Positive histology	8140/3: Adenocarcinoma, NOS	Localized	T2	N0	M0	10	0	40	23	0	One primary only	30	No radiation and/or cancer-directed surgery	None/Unknown	No/Unknown	No systemic therapy and/or surgical procedures	Alive or dead of other cause	Alive or dead due to cancer	93	Alive
1190483	Married (including common law)	White	71	Female	2011	Cecum	Moderately differentiated; Grade II	Positive histology	8140/3: Adenocarcinoma, NOS	Localized	T2	N0	M0	998	0	42	4	0	One primary only	40	No radiation and/or cancer-directed surgery	None/Unknown	No/Unknown	No systemic therapy and/or surgical procedures	Alive or dead of other cause	Alive or dead due to cancer	94	Alive
1190488	Married (including common law)	Black	75	Female	2011	Cecum	Moderately differentiated; Grade II	Positive histology	8140/3: Adenocarcinoma, NOS	Distant	T3	N2	M1	10	0	50	11	8	One primary only	40	No radiation and/or cancer-directed surgery	None/Unknown	Yes	Systemic therapy after surgery	Dead (attributable to this cancer dx)	Alive or dead due to cancer	17	Dead
1190534	Single (never married)	White	78	Female	2011	Ascending Colon	Moderately differentiated; Grade II	Positive histology	8140/3: Adenocarcinoma, NOS	Localized	T3	N0	M0	998	0	35	21	0	One primary only	40	No radiation and/or cancer-directed surgery	None/Unknown	No/Unknown	No systemic therapy and/or surgical procedures	Alive or dead of other cause	Dead (attributable to causes other than this cancer dx)	41	Dead
1190597	Widowed	Other (American Indian/AK Native, Asian/Pacific Islander)	85	Female	2011	Transverse Colon	Moderately differentiated; Grade II	Positive histology	8140/3: Adenocarcinoma, NOS	Regional	T3	N1	M0	998	1	55	4	1	One primary only	30	No radiation and/or cancer-directed surgery	None/Unknown	No/Unknown	No systemic therapy and/or surgical procedures	Alive or dead of other cause	Dead (attributable to causes other than this cancer dx)	23	Dead
1190599	Married (including common law)	Black	67	Male	2010	Rectum	Moderately differentiated; Grade II	Positive histology	8140/3: Adenocarcinoma, NOS	Localized	T1	N0	M0	998	0	6	0	98	One primary only	30	Radiation prior to surgery	Beam radiation	Yes	Systemic therapy before surgery	Dead (attributable to this cancer dx)	Alive or dead due to cancer	47	Dead
1190681	Married (including common law)	White	50	Female	2011	Sigmoid Colon	Poorly differentiated; Grade III	Positive histology	8140/3: Adenocarcinoma, NOS	Regional	T1	N1	M0	999	0	6	13	1	One primary only	30	No radiation and/or cancer-directed surgery	None/Unknown	Yes	Systemic therapy after surgery	Alive or dead of other cause	Alive or dead due to cancer	68	Alive
1190694	Single (never married)	White	50	Female	2011	Rectum	Moderately differentiated; Grade II	Positive histology	8140/3: Adenocarcinoma, NOS	Distant	T3	N2	M1	10	2	20	24	6	One primary only	30	Radiation after surgery	Beam radiation	Yes	Systemic therapy both before and after surgery	Alive or dead of other cause	Alive or dead due to cancer	94	Alive
1190708	Single (never married)	White	39	Female	2011	Cecum	Moderately differentiated; Grade II	Positive histology	8263/3: Adenocarcinoma in tubulovillous adenoma	Localized	T1	N0	M0	20	0	48	13	0	One primary only	40	No radiation and/or cancer-directed surgery	None/Unknown	No/Unknown	No systemic therapy and/or surgical procedures	Alive or dead of other cause	Alive or dead due to cancer	75	Alive
1190728	Married (including common law)	White	50	Female	2011	Ascending Colon	Moderately differentiated; Grade II	Positive histology	8140/3: Adenocarcinoma, NOS	Distant	T4	N1	M1	998	0	36	25	0	One primary only	40	No radiation and/or cancer-directed surgery	None/Unknown	No/Unknown	No systemic therapy and/or surgical procedures	Dead (attributable to this cancer dx)	Alive or dead due to cancer	2	Dead
1190739	Married (including common law)	White	62	Female	2010	Rectosigmoid Junction	Moderately differentiated; Grade II	Positive histology	8140/3: Adenocarcinoma, NOS	Regional	T3	N1	M0	998	990	40	14	0	One primary only	30	Radiation prior to surgery	Beam radiation	Yes	Systemic therapy before surgery	Dead (attributable to this cancer dx)	Alive or dead due to cancer	38	Dead
1190749	Single (never married)	White	45	Female	2011	Ascending Colon	Moderately differentiated; Grade II	Positive histology	8140/3: Adenocarcinoma, NOS	Localized	T3	N0	M0	20	0	60	27	0	One primary only	40	No radiation and/or cancer-directed surgery	None/Unknown	No/Unknown	No systemic therapy and/or surgical procedures	Alive or dead of other cause	Alive or dead due to cancer	95	Alive
1190944	Widowed	Black	80	Female	2011	Cecum	Poorly differentiated; Grade III	Positive histology	8140/3: Adenocarcinoma, NOS	Distant	T4	N1	M1	10	0	60	2	2	One primary only	40	No radiation and/or cancer-directed surgery	None/Unknown	No/Unknown	No systemic therapy and/or surgical procedures	Dead (attributable to this cancer dx)	Alive or dead due to cancer	1	Dead
1190950	Single (never married)	White	85	Female	2011	Ascending Colon	Well differentiated; Grade I	Positive histology	8263/3: Adenocarcinoma in tubulovillous adenoma	Localized	T2	N0	M0	998	0	75	13	0	One primary only	40	No radiation and/or cancer-directed surgery	None/Unknown	No/Unknown	No systemic therapy and/or surgical procedures	Alive or dead of other cause	Alive or dead due to cancer	95	Alive
1190974	Single (never married)	Black	59	Male	2011	Rectosigmoid Junction	Well differentiated; Grade I	Positive histology	8140/3: Adenocarcinoma, NOS	Regional	T3	N1	M0	998	0	56	30	1	One primary only	31	No radiation and/or cancer-directed surgery	None/Unknown	No/Unknown	No systemic therapy and/or surgical procedures	Dead (attributable to this cancer dx)	Alive or dead due to cancer	37	Dead
1190977	Single (never married)	White	66	Male	2010	Cecum	Moderately differentiated; Grade II	Positive histology	8263/3: Adenocarcinoma in tubulovillous adenoma	Localized	T2	N0	M0	20	0	25	18	0	One primary only	40	No radiation and/or cancer-directed surgery	None/Unknown	No/Unknown	No systemic therapy and/or surgical procedures	Dead (missing/unknown COD)	Dead (missing/unknown COD)	41	Dead
1191077	Divorced	White	85	Female	2011	Cecum	Well differentiated; Grade I	Positive histology	8140/3: Adenocarcinoma, NOS	Regional	T4	N1	M0	20	0	60	15	1	One primary only	80	No radiation and/or cancer-directed surgery	None/Unknown	No/Unknown	No systemic therapy and/or surgical procedures	Dead (attributable to this cancer dx)	Alive or dead due to cancer	11	Dead
1191113	Married (including common law)	White	40	Female	2011	Rectosigmoid Junction	Moderately differentiated; Grade II	Positive histology	8140/3: Adenocarcinoma, NOS	Distant	T3	N2	M1	998	0	54	22	10	One primary only	30	Radiation prior to surgery	Beam radiation	Yes	Systemic therapy both before and after surgery	Dead (attributable to this cancer dx)	Alive or dead due to cancer	69	Dead
1191167	Married (including common law)	White	84	Female	2010	Rectum	Moderately differentiated; Grade II	Positive histology	8140/3: Adenocarcinoma, NOS	Regional	T3	N0	M0	10	0	14	20	0	One primary only	30	Radiation prior to surgery	Beam radiation	Yes	Systemic therapy before surgery	Dead (attributable to this cancer dx)	Alive or dead due to cancer	52	Dead
1191188	Unknown	White	85	Female	2010	Ascending Colon	Moderately differentiated; Grade II	Positive histology	8140/3: Adenocarcinoma, NOS	Regional	T4	N0	M0	20	0	30	16	0	One primary only	40	No radiation and/or cancer-directed surgery	None/Unknown	No/Unknown	No systemic therapy and/or surgical procedures	Dead (attributable to this cancer dx)	Alive or dead due to cancer	5	Dead
1191329	Married (including common law)	White	63	Male	2011	Rectosigmoid Junction	Moderately differentiated; Grade II	Positive histology	8140/3: Adenocarcinoma, NOS	Regional	T3	N0	M0	20	0	24	1	0	One primary only	30	Radiation after surgery	Beam radiation	Yes	Systemic therapy after surgery	Alive or dead of other cause	Alive or dead due to cancer	95	Alive
1191400	Married (including common law)	Other (American Indian/AK Native, Asian/Pacific Islander)	64	Male	2011	Sigmoid Colon	Moderately differentiated; Grade II	Positive histology	8140/3: Adenocarcinoma, NOS	Distant	T3	N1	M1	998	0	37	21	3	One primary only	30	No radiation and/or cancer-directed surgery	None/Unknown	Yes	Systemic therapy after surgery	Dead (attributable to this cancer dx)	Alive or dead due to cancer	45	Dead
1191446	Single (never married)	White	41	Female	2010	Sigmoid Colon	Moderately differentiated; Grade II	Positive histology	8140/3: Adenocarcinoma, NOS	Regional	T2	N1	M0	20	0	46	20	1	One primary only	30	No radiation and/or cancer-directed surgery	None/Unknown	Yes	Systemic therapy after surgery	Alive or dead of other cause	Alive or dead due to cancer	93	Alive
1191451	Married (including common law)	Other (American Indian/AK Native, Asian/Pacific Islander)	34	Female	2010	Rectum	Moderately differentiated; Grade II	Positive histology	8140/3: Adenocarcinoma, NOS	Localized	T2	N0	M0	20	0	15	17	0	One primary only	30	Radiation prior to surgery	Beam radiation	Yes	Systemic therapy both before and after surgery	Alive or dead of other cause	Alive or dead due to cancer	91	Alive
1191468	Single (never married)	White	58	Female	2010	Rectum	Moderately differentiated; Grade II	Positive histology	8210/3: Adenocarcinoma in adenomatous polyp	Regional	T2	N1	M0	20	6	18	39	0	One primary only	30	No radiation and/or cancer-directed surgery	None/Unknown	No/Unknown	No systemic therapy and/or surgical procedures	Alive or dead of other cause	Alive or dead due to cancer	86	Alive
1191596	Unknown	Other (American Indian/AK Native, Asian/Pacific Islander)	53	Male	2011	Rectum	Moderately differentiated; Grade II	Positive histology	8140/3: Adenocarcinoma, NOS	Regional	T2	N1	M0	20	0	17	15	1	One primary only	30	No radiation and/or cancer-directed surgery	None/Unknown	No/Unknown	No systemic therapy and/or surgical procedures	Alive or dead of other cause	Alive or dead due to cancer	94	Alive
1191779	Married (including common law)	White	68	Female	2010	Sigmoid Colon	Moderately differentiated; Grade II	Positive histology	8140/3: Adenocarcinoma, NOS	Distant	T4	N1	M1	10	990	47	29	3	One primary only	40	No radiation and/or cancer-directed surgery	None/Unknown	Yes	Systemic therapy after surgery	Dead (attributable to this cancer dx)	Alive or dead due to cancer	22	Dead
1191801	Married (including common law)	Black	62	Female	2010	Hepatic Flexure	Poorly differentiated; Grade III	Positive histology	8140/3: Adenocarcinoma, NOS	Regional	T3	N1	M0	998	0	6	10	1	One primary only	40	No radiation and/or cancer-directed surgery	None/Unknown	No/Unknown	No systemic therapy and/or surgical procedures	Dead (attributable to this cancer dx)	Alive or dead due to cancer	5	Dead
1191913	Married (including common law)	Other (American Indian/AK Native, Asian/Pacific Islander)	61	Female	2011	Rectum	Moderately differentiated; Grade II	Positive histology	8140/3: Adenocarcinoma, NOS	Regional	T3	N1	M0	998	0	50	0	98	One primary only	30	Radiation prior to surgery	Beam radiation	Yes	Systemic therapy before surgery	Alive or dead of other cause	Alive or dead due to cancer	55	Alive
1191925	Married (including common law)	Other (American Indian/AK Native, Asian/Pacific Islander)	54	Male	2011	Rectum	Moderately differentiated; Grade II	Positive histology	8480/3: Mucinous adenocarcinoma	Localized	T3	N0	M0	998	0	25	6	0	One primary only	50	Radiation before and after surgery	Beam radiation	Yes	Systemic therapy both before and after surgery	Alive or dead of other cause	Alive or dead due to cancer	92	Alive
1192117	Married (including common law)	White	84	Male	2010	Cecum	Poorly differentiated; Grade III	Positive histology	8140/3: Adenocarcinoma, NOS	Localized	T2	N0	M0	20	0	47	17	0	One primary only	50	No radiation and/or cancer-directed surgery	None/Unknown	No/Unknown	No systemic therapy and/or surgical procedures	Alive or dead of other cause	Dead (attributable to causes other than this cancer dx)	49	Dead
1192123	Single (never married)	White	85	Female	2010	Ascending Colon	Poorly differentiated; Grade III	Positive histology	8140/3: Adenocarcinoma, NOS	Localized	T3	N0	M0	999	0	57	26	0	One primary only	40	No radiation and/or cancer-directed surgery	None/Unknown	No/Unknown	No systemic therapy and/or surgical procedures	Dead (attributable to this cancer dx)	Alive or dead due to cancer	7	Dead
1192124	Unknown	White	85	Male	2010	Transverse Colon	Moderately differentiated; Grade II	Positive histology	8140/3: Adenocarcinoma, NOS	Localized	T3	N0	M0	20	0	65	14	0	One primary only	30	No radiation and/or cancer-directed surgery	None/Unknown	No/Unknown	No systemic therapy and/or surgical procedures	Alive or dead of other cause	Dead (attributable to causes other than this cancer dx)	45	Dead
1192127	Married (including common law)	Other (American Indian/AK Native, Asian/Pacific Islander)	47	Female	2010	Sigmoid Colon	Moderately differentiated; Grade II	Positive histology	8140/3: Adenocarcinoma, NOS	Distant	T4	N1	M1	10	2	42	6	0	One primary only	30	No radiation and/or cancer-directed surgery	None/Unknown	Yes	Systemic therapy after surgery	Dead (attributable to this cancer dx)	Alive or dead due to cancer	24	Dead
1192129	Married (including common law)	Other (American Indian/AK Native, Asian/Pacific Islander)	84	Female	2010	Sigmoid Colon	Moderately differentiated; Grade II	Positive histology	8140/3: Adenocarcinoma, NOS	Localized	T2	N0	M0	20	0	18	10	0	One primary only	30	No radiation and/or cancer-directed surgery	None/Unknown	No/Unknown	No systemic therapy and/or surgical procedures	Alive or dead of other cause	Alive or dead due to cancer	89	Alive
1192224	Single (never married)	White	47	Male	2011	Rectum	Moderately differentiated; Grade II	Positive histology	8140/3: Adenocarcinoma, NOS	Regional	T3	N1	M0	10	0	35	9	2	One primary only	30	Radiation prior to surgery	Beam radiation	Yes	Systemic therapy both before and after surgery	Alive or dead of other cause	Alive or dead due to cancer	92	Alive
1192228	Married (including common law)	White	73	Female	2011	Rectum	Moderately differentiated; Grade II	Positive histology	8140/3: Adenocarcinoma, NOS	Localized	T1	N0	M0	20	0	12	14	0	One primary only	30	No radiation and/or cancer-directed surgery	None/Unknown	No/Unknown	No systemic therapy and/or surgical procedures	Alive or dead of other cause	Alive or dead due to cancer	91	Alive
1192253	Married (including common law)	Other (American Indian/AK Native, Asian/Pacific Islander)	61	Female	2011	Rectum	Moderately differentiated; Grade II	Positive histology	8140/3: Adenocarcinoma, NOS	Distant	T4	N1	M0	998	998	999	0	98	One primary only	0	No radiation and/or cancer-directed surgery	Beam radiation	Yes	No systemic therapy and/or surgical procedures	Dead (attributable to this cancer dx)	Alive or dead due to cancer	18	Dead
1192292	Unknown	White	65	Female	2011	Rectum	Moderately differentiated; Grade II	Positive histology	8140/3: Adenocarcinoma, NOS	Localized	T3	N0	M0	999	0	28	6	0	One primary only	50	Radiation prior to surgery	Beam radiation	Yes	Systemic therapy both before and after surgery	Alive or dead of other cause	Alive or dead due to cancer	95	Alive
[truncated: 149,276 more rows]
